# Supplementary material for: Metallo-β-Lactamase Inhibitor Phosphonamidate Monoesters
Source: PubMed Central journal article supplement (PMC8830069; doi:10.1021/acsomega.1c06527), 2022-01-25
Supplement: ao1c06527_si_001.pdf [file ao1c06527_si_001.pdf]

# Supporting Information

## **Metallo- $\beta$ -lactamase inhibitor phosphoramidate monoesters**

Katarzyna Palica,<sup>†</sup> Manuela Voráčová,<sup>†</sup> Susann Skagseth,<sup>‡</sup> Anna Andersson Rasmussen,<sup>†</sup> Lisa Allander,<sup>±</sup> Madlen Hubert,<sup>‡</sup> Linus Sandegren,<sup>±</sup> Hanna-Kirsti Schröder Leiros,<sup>‡</sup> Hanna Andersson,<sup>\*,†</sup> and Máté Erdélyi<sup>\*,†</sup>

<sup>†</sup> Department of Chemistry - BMC, Organic Chemistry; Uppsala University, Husargatan 3, 752 37 Uppsala, Sweden

<sup>‡</sup> The Norwegian Structural Biology Centre (NorStruct), Department of Chemistry, Faculty of Science and Technology, UiT The Arctic University of Norway, N-9037 Tromsø, Norway

<sup>±</sup> Department of Medical Biochemistry and Microbiology – BMC, Uppsala University, Husargatan 3, 752 37 Uppsala, Sweden

<sup>‡</sup> Department of Pharmacy – BMC, Uppsala University, Husargatan 3, 752 37 Uppsala, Sweden

**Table of contents**

|                                                                    |    |
|--------------------------------------------------------------------|----|
| 1. Dose-response graphs.....                                       | 3  |
| 3. MIC studies for NDM-1 .....                                     | 6  |
| 4. Cytotoxicity assay .....                                        | 7  |
| 5. NMR assignment of NDM-1, chemical shift titration and NOE ..... | 8  |
| 6. The protein sequence of NDM-1 .....                             | 15 |
| 7. NMR spectra of the synthesized compounds .....                  | 19 |

The protein NMR data has been deposited to the Biological Magnetic Resonance Bank with BMRB ID 50945. The original NMR FIDs for all compounds are available free of charge on Zenodo as DOI:10.5281/zenodo.4773990.

# 1. Dose-response graphs

Table S1. The dose-response graphs.

| Inhibitors | NDM-1                                                            | GIM-1                                                            | VIM-2                                                                 |
|------------|------------------------------------------------------------------|------------------------------------------------------------------|-----------------------------------------------------------------------|
| 1a         | <p><b>191113 NDM-1 KAT-A-142-H2</b></p>                          | <p><b>KAT-A-142-H1 GIM-1</b></p> <p>IC<sub>50</sub> = 86 μM</p>  | <p><b>191031 VIM-2 KAT-A-142-H2</b></p>                               |
| 1b         | <p><b>KAT-A-139-H1 NDM-1</b></p> <p>IC<sub>50</sub> = 356 μM</p> | <p><b>KAT-A-139-H1 GIM-1</b></p> <p>IC<sub>50</sub> = 109 μM</p> | <p><b>KAT-A-139-H1 VIM-2</b></p> <p>IC<sub>50</sub> = &gt;1400 μM</p> |

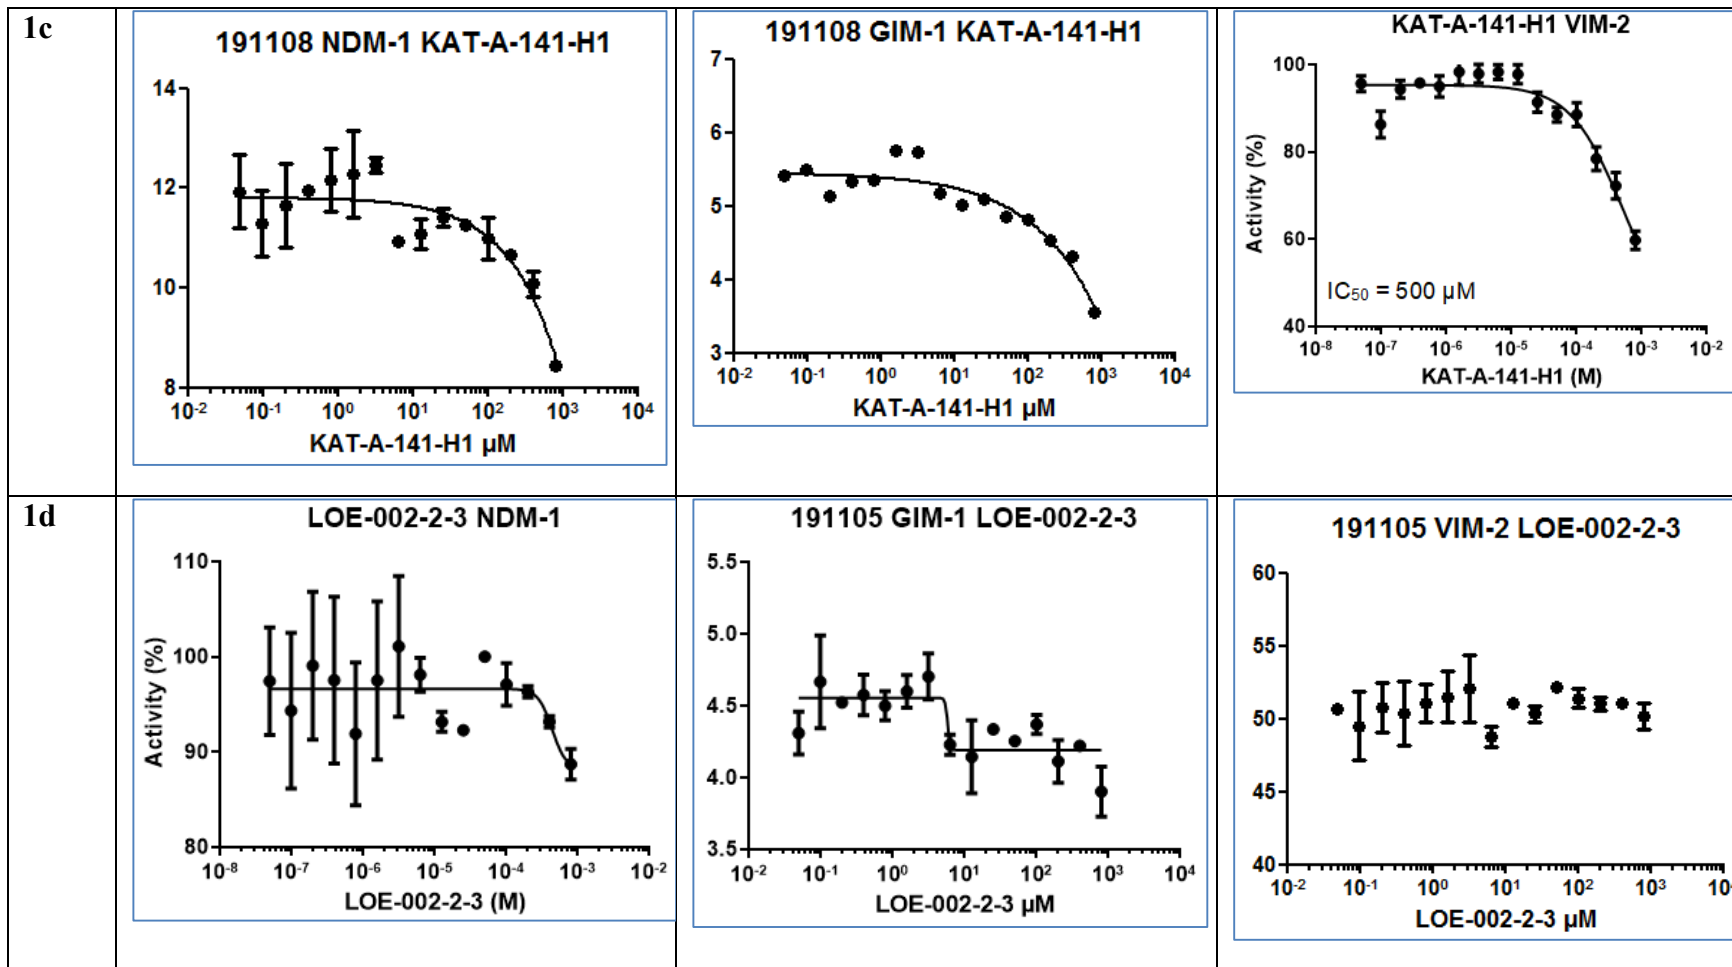

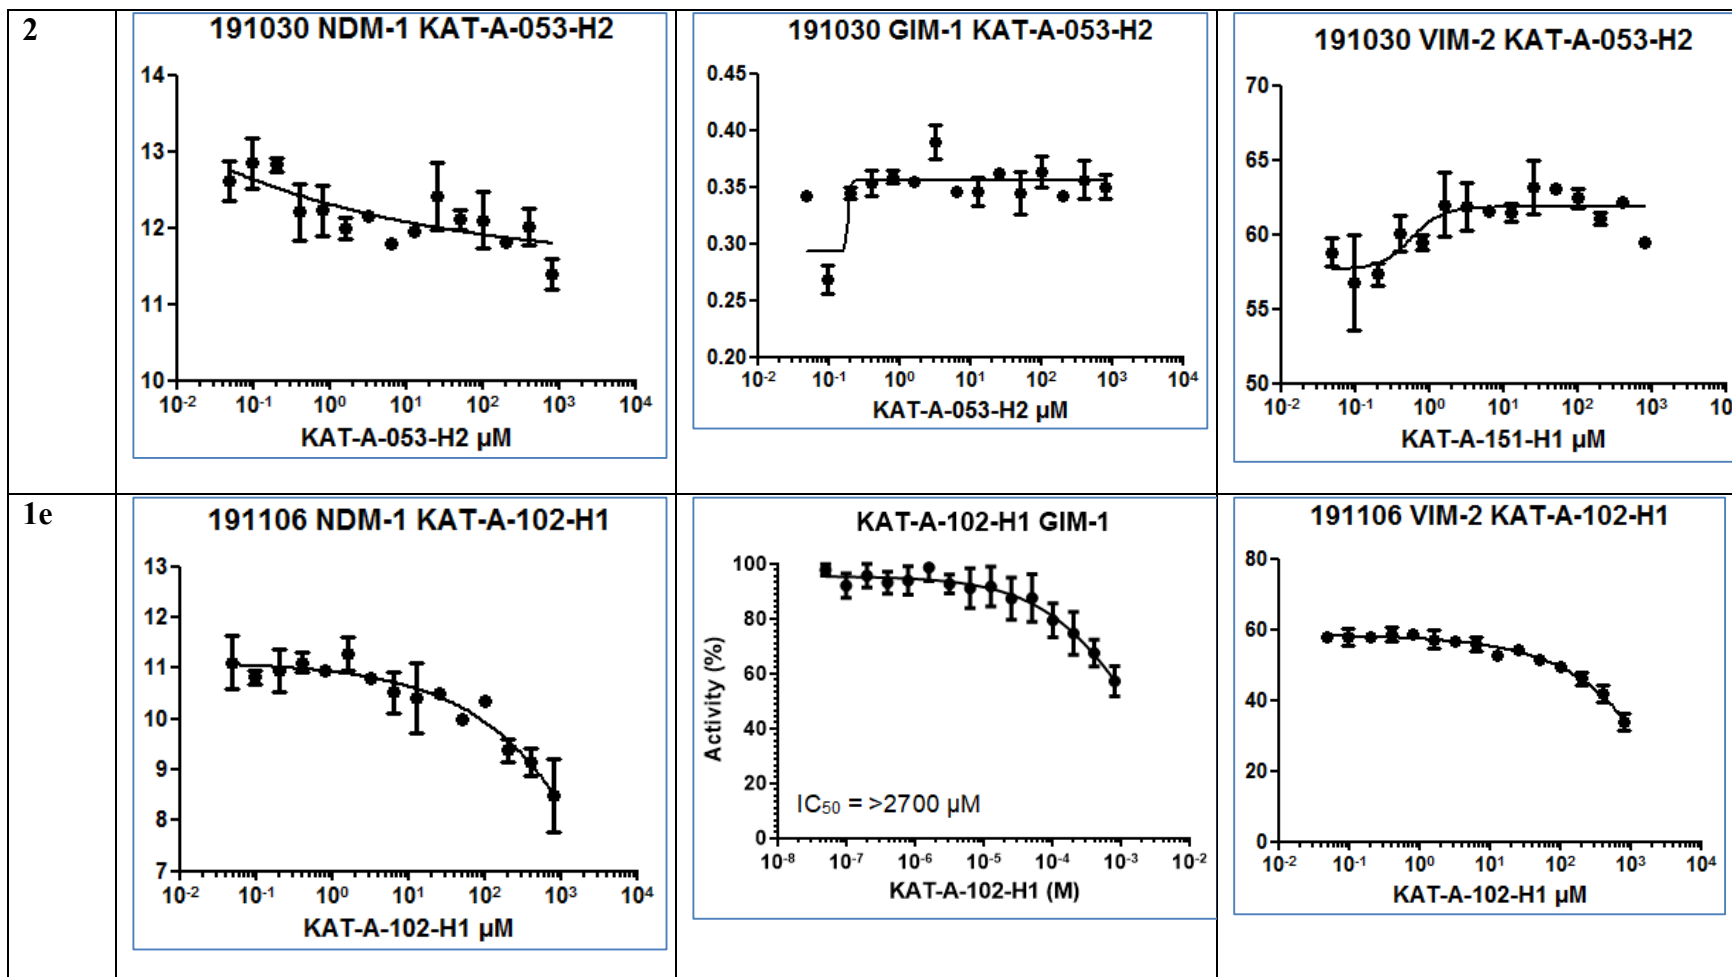

### 3. MIC studies for NDM-1

**Table S2.** Susceptibility assay with *E. coli* ATCC 25922 NDM-1

| Compound         | Minimum inhibitory concentration (mg/L) |        |           |
|------------------|-----------------------------------------|--------|-----------|
|                  | Meropenem:compound ratio                |        | Meropenem |
| No compound      |                                         |        | 32        |
| EDTA 100 $\mu$ M |                                         |        | < 2       |
| <b>1c</b>        | 8:1024                                  | 4:1024 | 2:1024    |
| <b>1b</b>        | 8:1024                                  | 4:1024 | 2:1024    |
| <b>1d</b>        | 8:1024                                  | 4:1024 | > 2:1024  |
| <b>1a</b>        | 8:1024                                  | 4:1024 | 2:1024    |
| <b>1h</b>        | 8:1024                                  | 4:1024 | 2:1024    |

\***1e**, **1g** and **1f** could not be dissolved in MIC assay.

## 4. Cytotoxicity assay

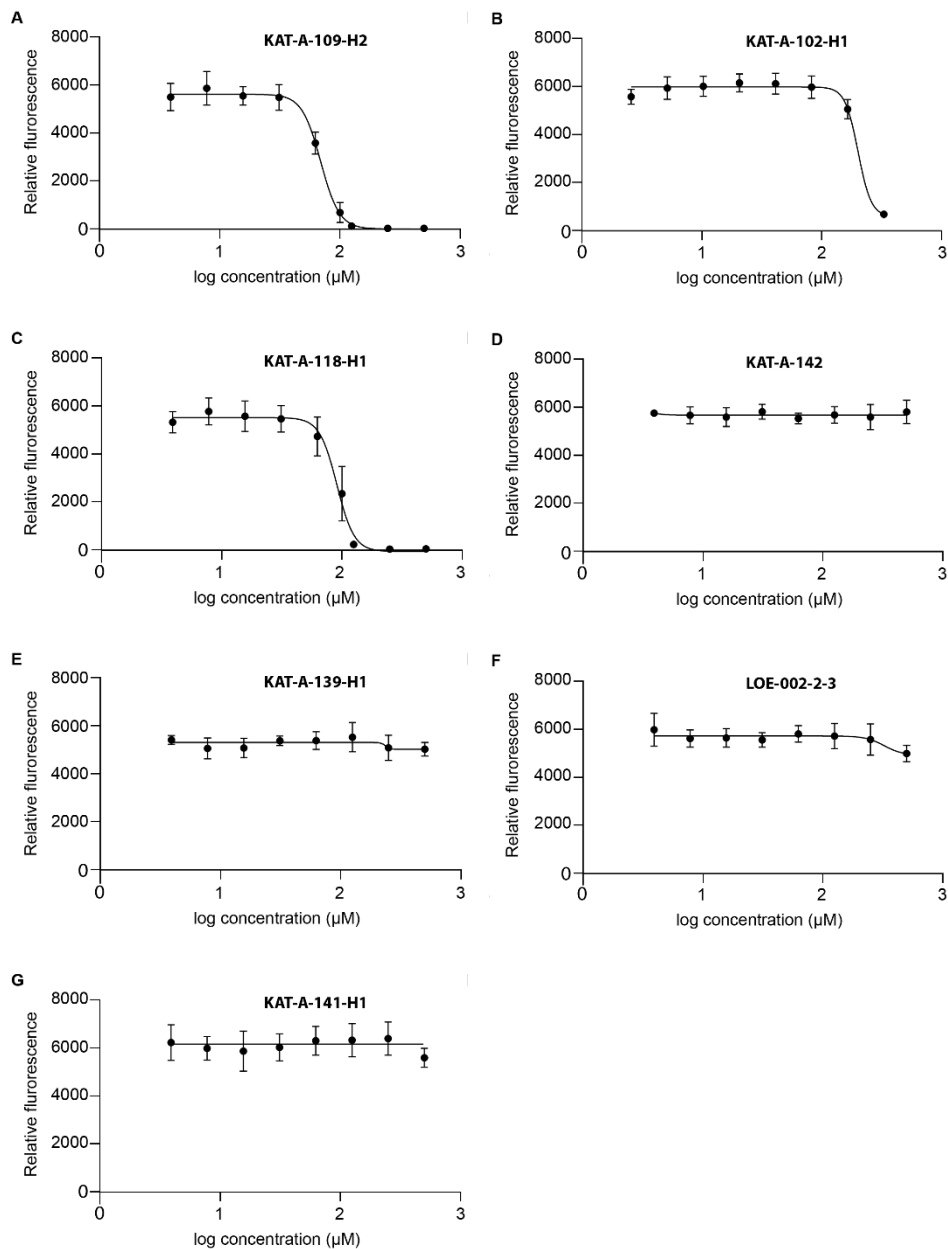

**Figure S1.** Cytotoxicity dose-response curves of phosphoramidate monoesters as determined in HeLa cells. The cells were treated with the compounds at the indicated concentrations, and cell viability was measured after 24 hours incubation. The following IC<sub>50</sub> values were determined to be (A) 69.2 μM (SD = 1.0) for KAT-A-109-H2, (B) 201.4 μM (SD = 4.4) for KAT-A-102-H1 and (C) 90.7 μM (SD = 1.0) for KAT-A-118-H1. All remaining compounds (D-H) had IC<sub>50</sub> values above 500 μM. Data is shown as mean ± SD of at least two independent experiments.

\*A **1h**, B **1e**, C **1f**, D **1a**, E **1b**, F **1d**, G **1c**.

## 5. NMR assignment of NDM-1, chemical shift titration and NOE

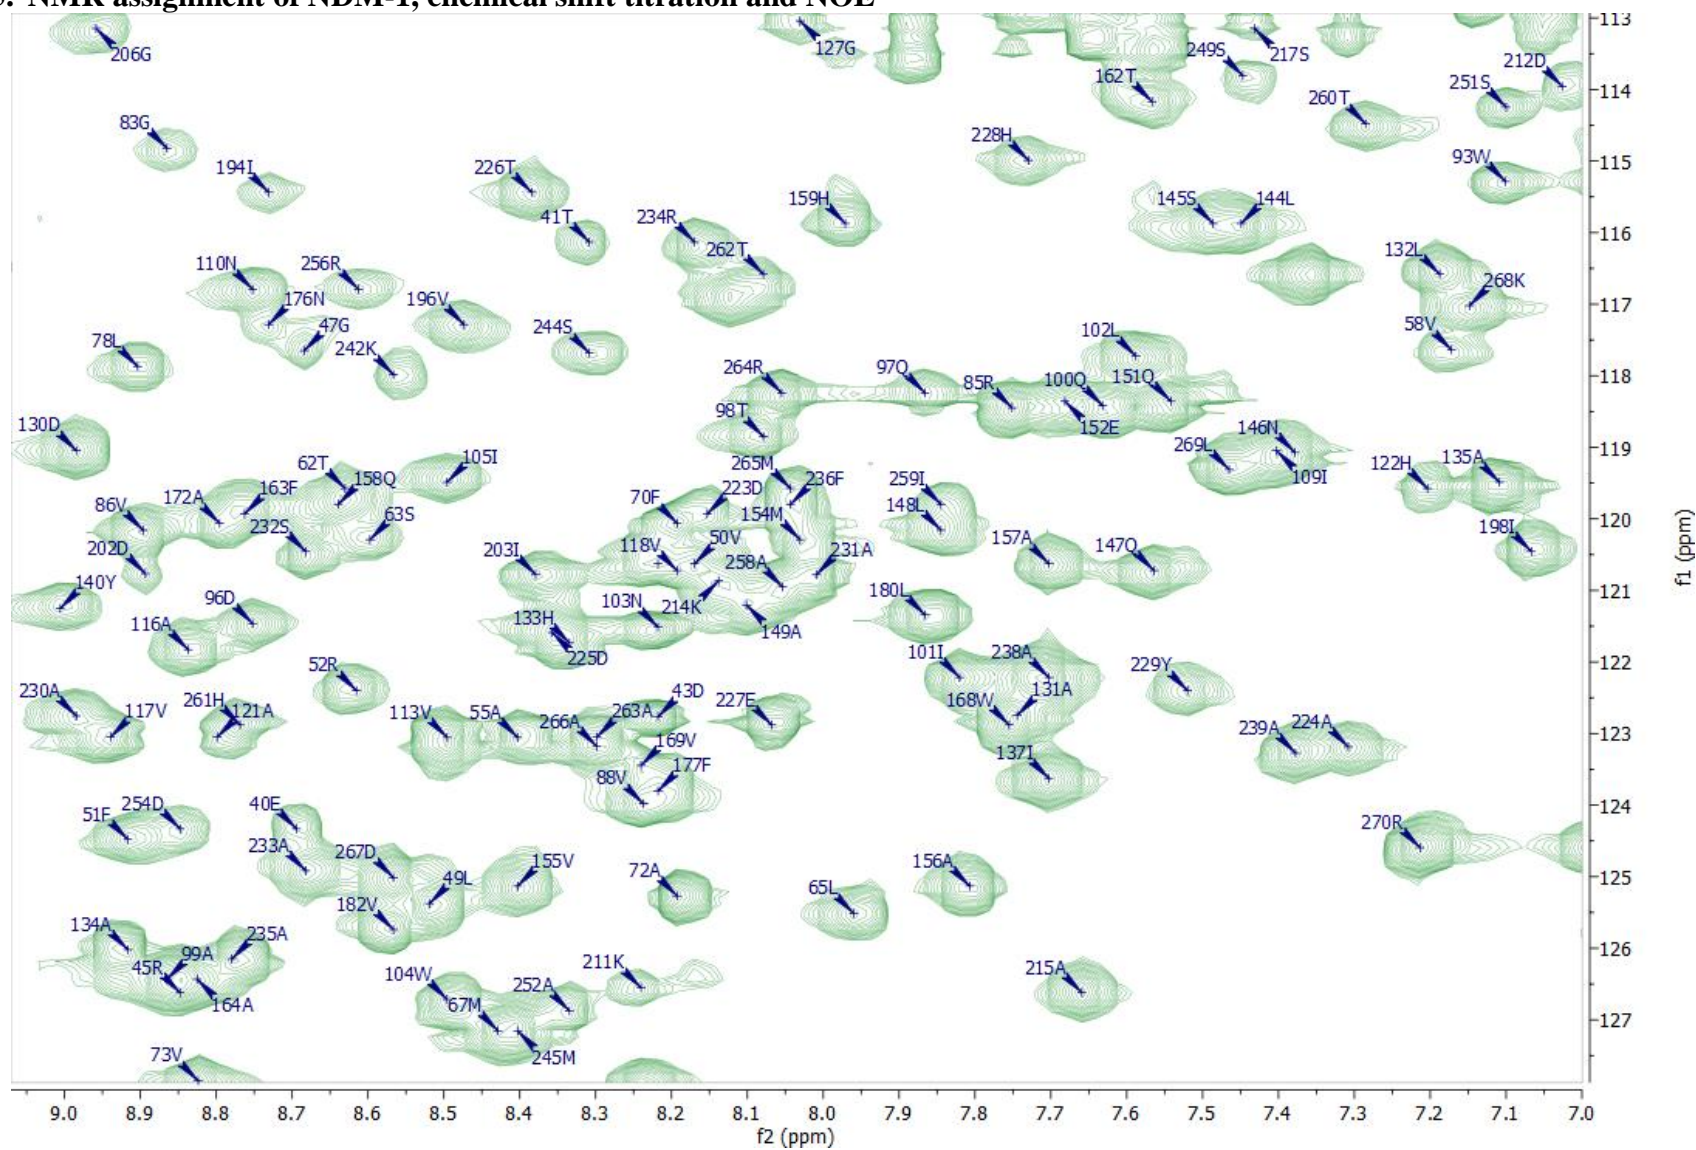

**Figure S2.** Expansion of the overlapping area of  $^1\text{H}$ ,  $^{15}\text{N}$  HSQC with assignment of chemical shift of NDM-1



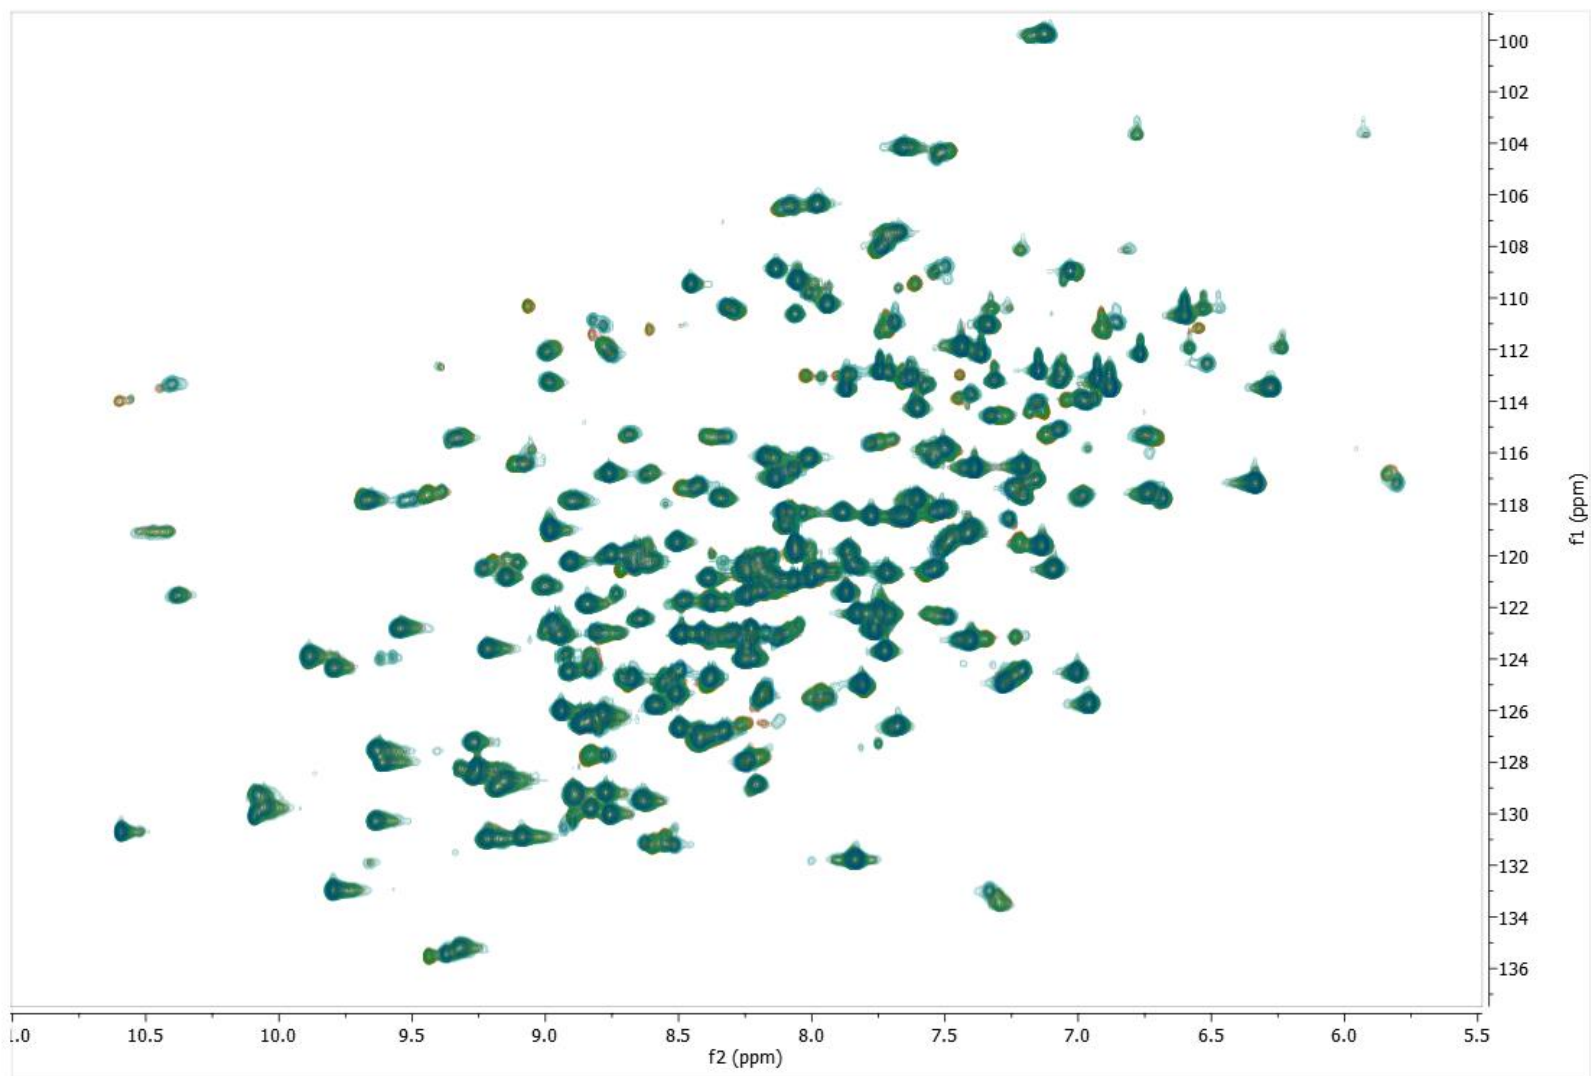

**Figure S3.** Superposition of the full  $^1\text{H}$ ,  $^{15}\text{N}$  HSQC spectrum of free NDM-1 (titration step 0 in red), and NDM-1 bound to **1d** (last step 10 eq blue)

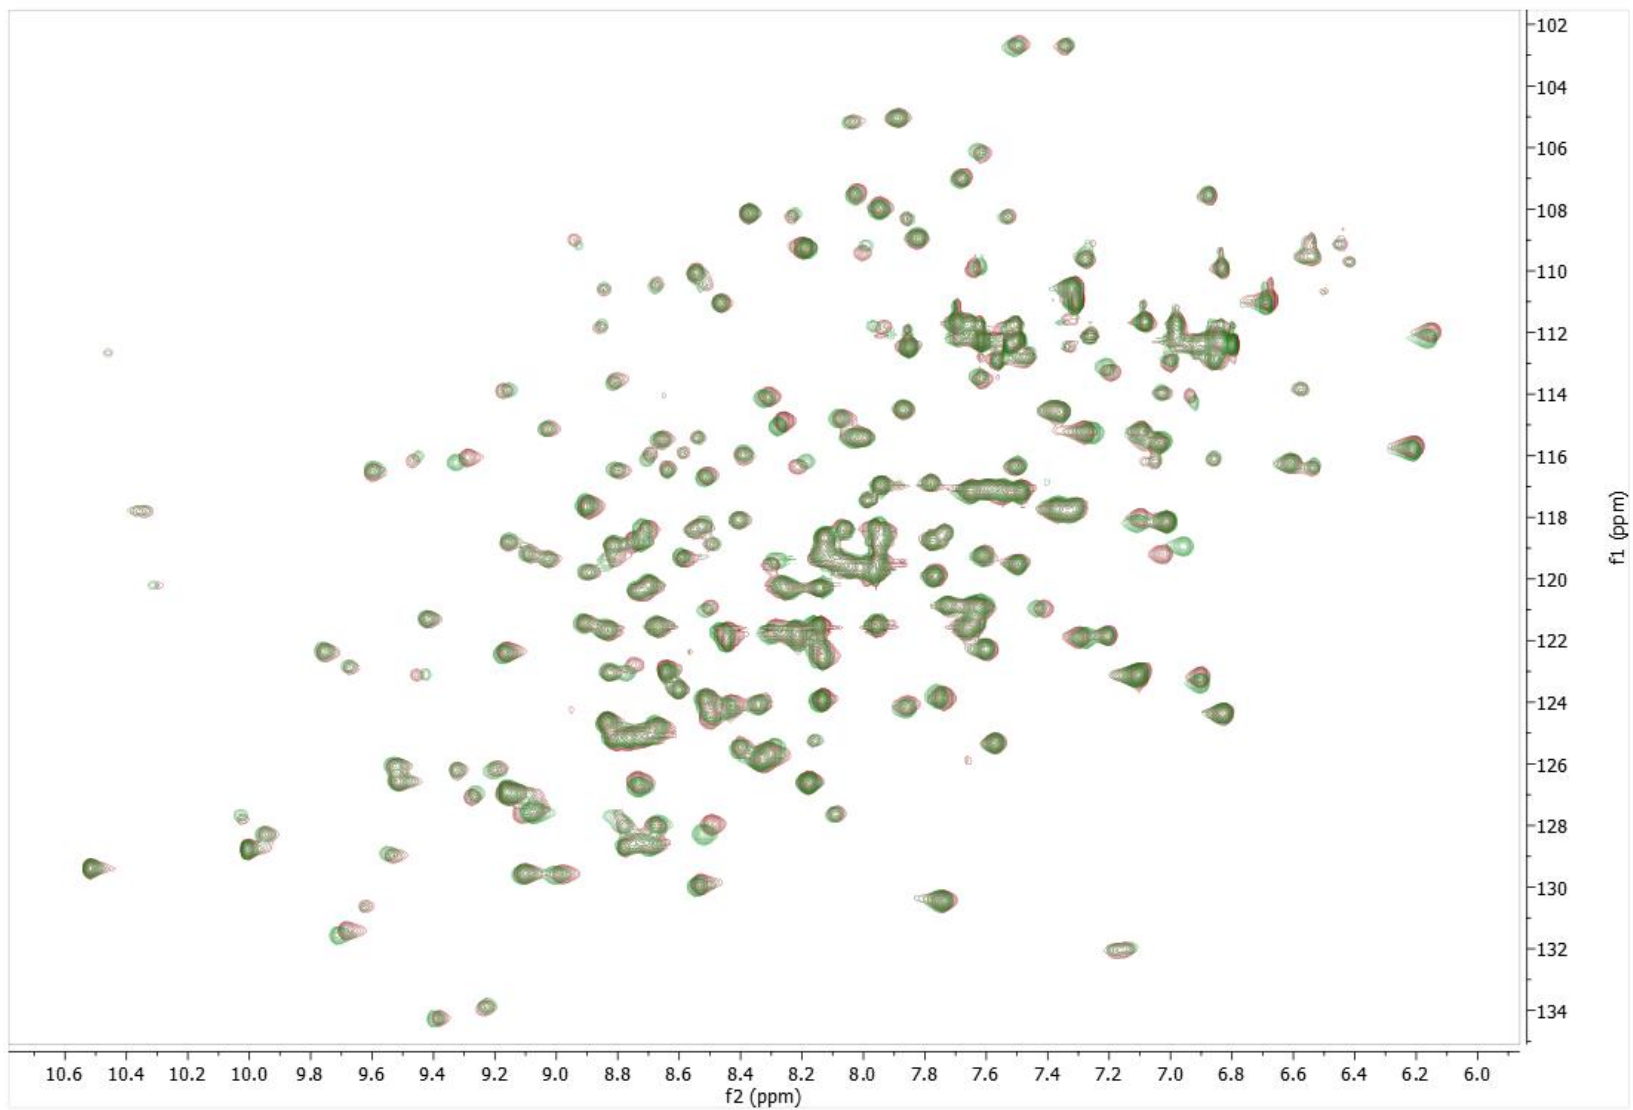

**Figure S4.**  $^1\text{H}$ ,  $^{15}\text{N}$  HSQC of NDM-1 (green) with 5% EtOH (red).

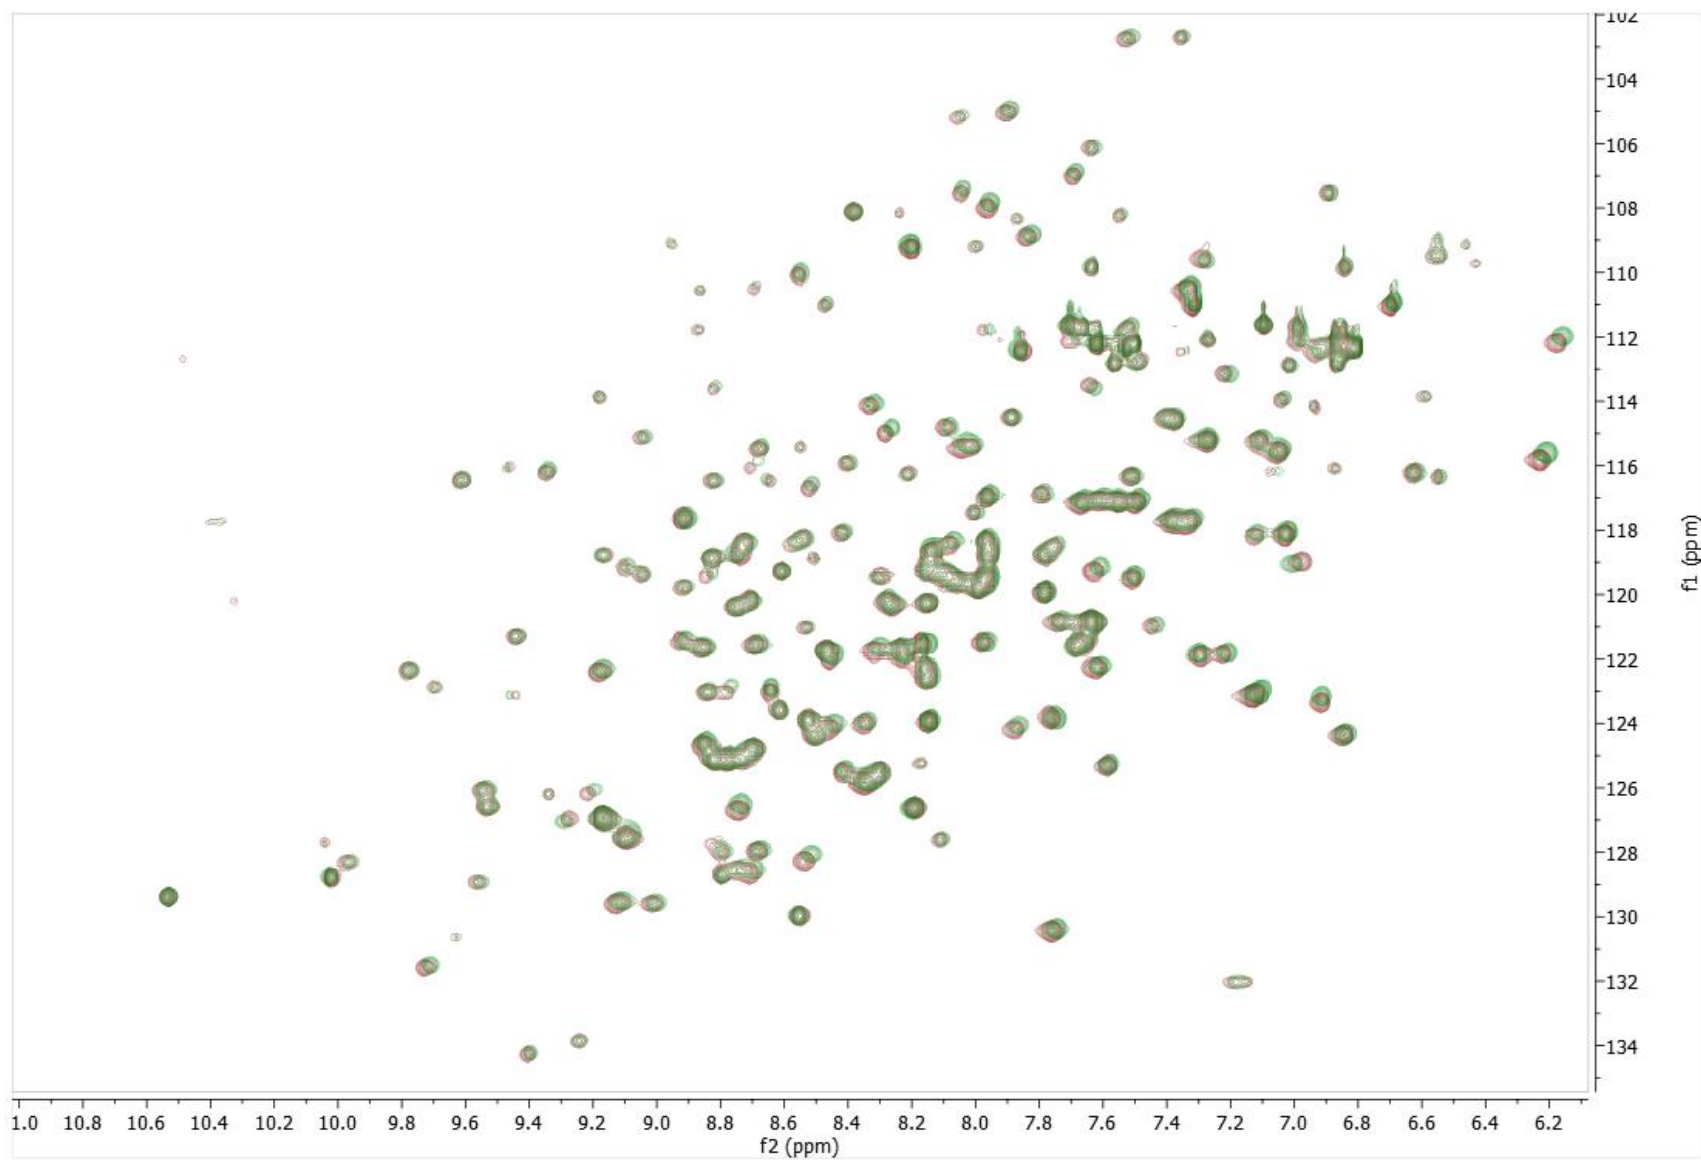

**Figure S5.**  $^1\text{H}$ - $^{15}\text{N}$  HSQC of NDM-1 (red) with 5% DMSO (green).

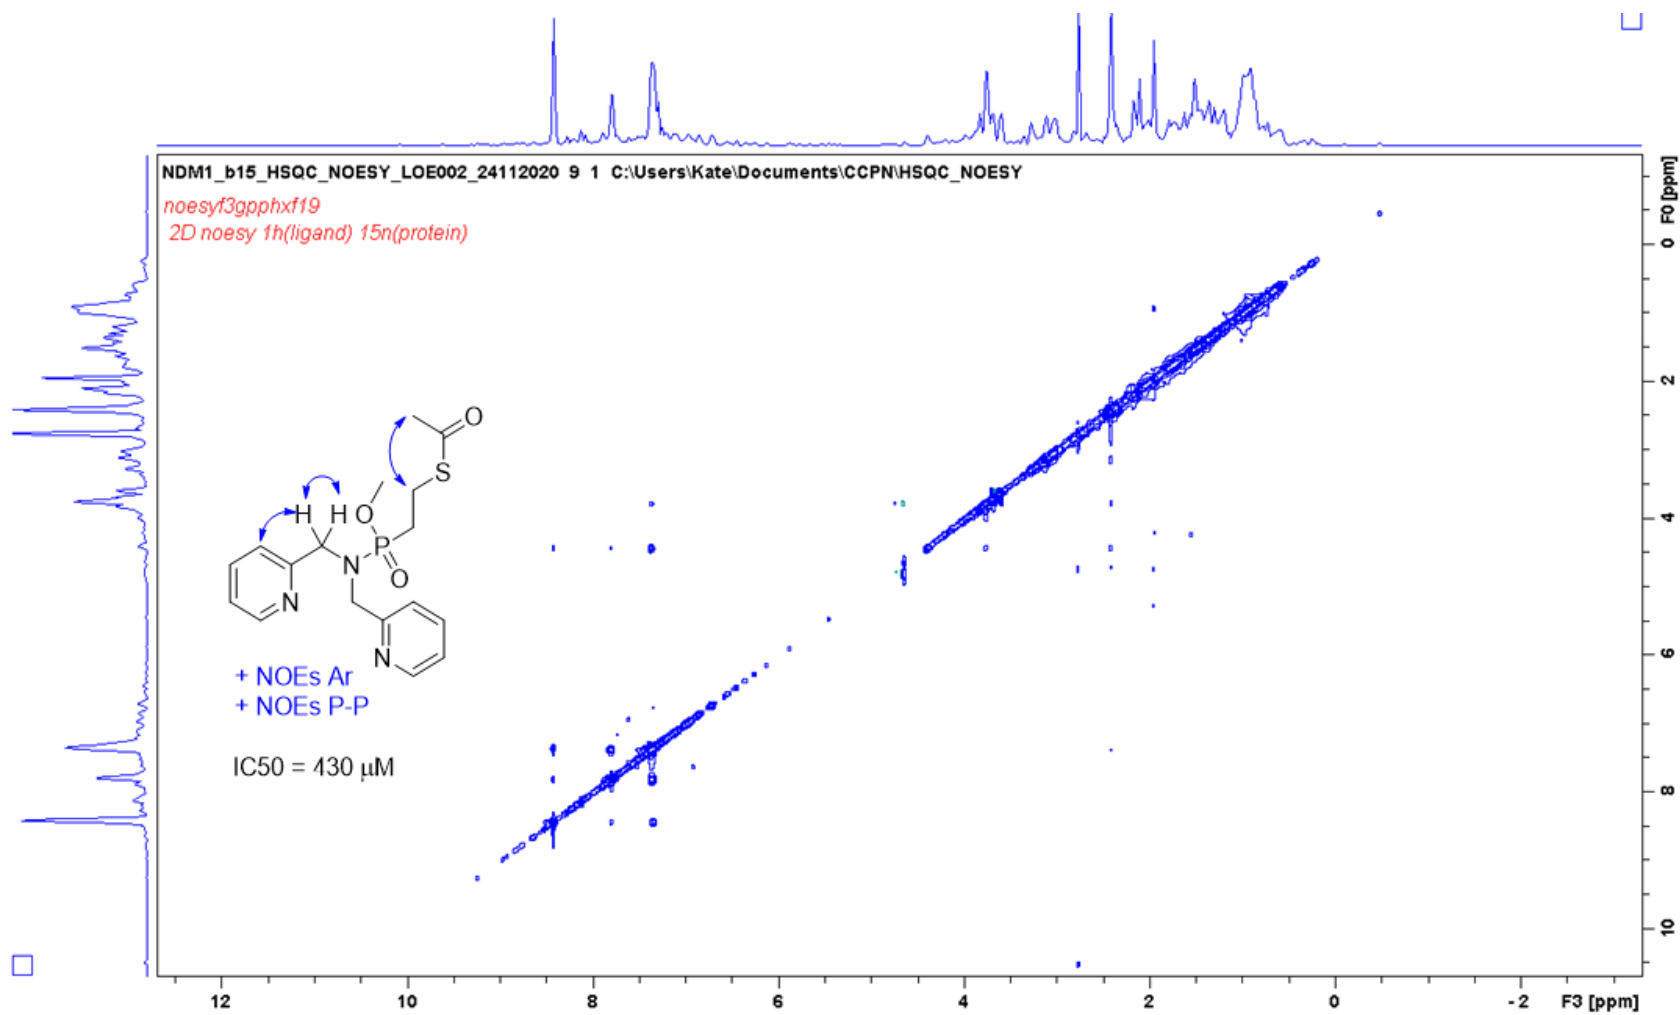

**Figure S6.** 2D  $^{15}\text{N}$ -filtered NOESY for NDM-1 with **1d** (8 eq).

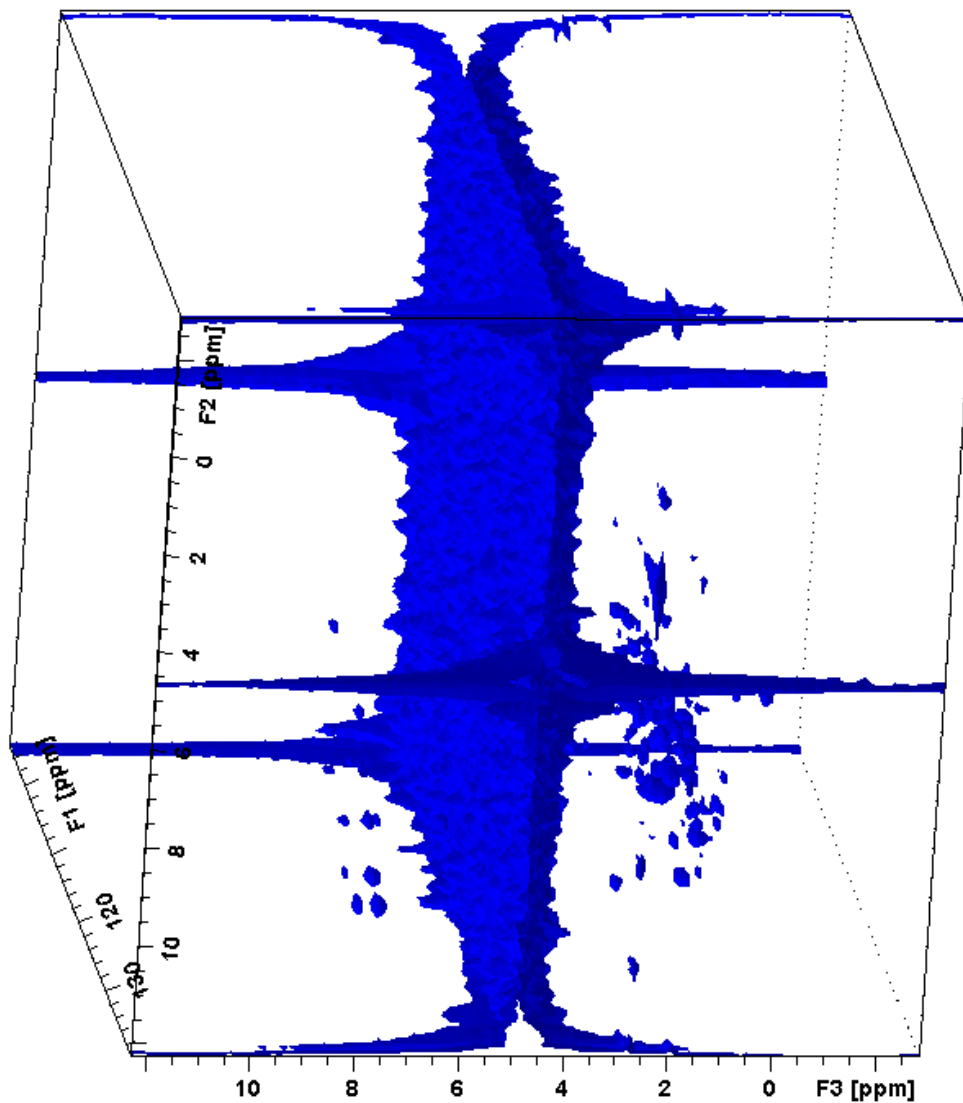

**Figure S7.** 3D  $^{15}\text{N}$ -filtred HSQC-NOESY in 3D cube mode for NDM-1 and **1d** (8eq). Dimensions: F1 = chemical shift of  $^{15}\text{N}$  protein; F2 = chemical shift of  $^1\text{H}$  protein, F3 = chemical shift of  $^1\text{H}$  ligand.

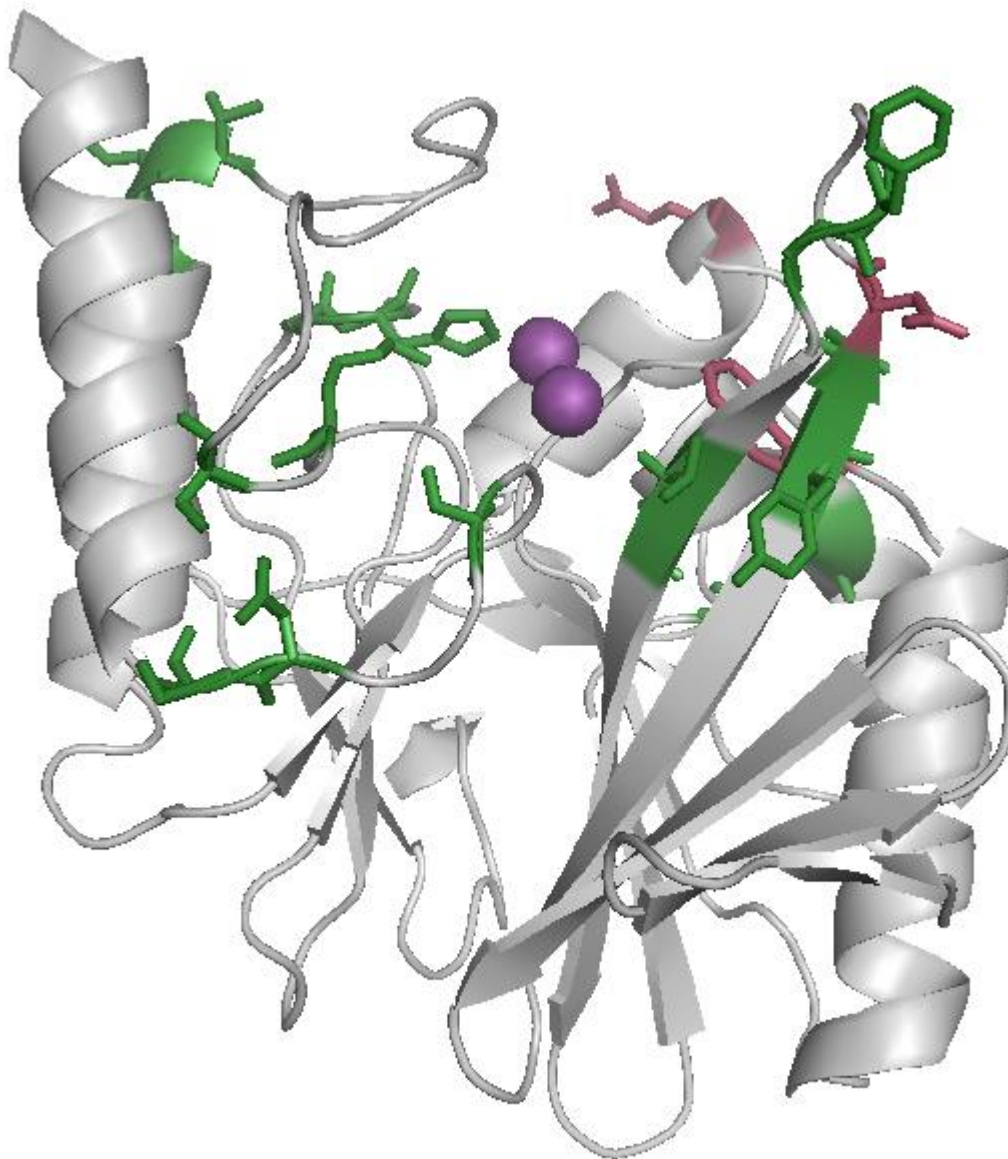

**Figure S8.** Highlighted green and pink amino acid residues on the NDM-1 (*PDB:4exs*) secondary structure with SSP corresponding to weighted average ( $^1\text{H}, ^{15}\text{N } \Delta\delta$ ) greater than the population mean plus standard deviation ( $\mu+1\sigma$ ). Pink colored residues are highlighted due to additional NOE correlations detected in the 3D  $^{15}\text{N}$ -filtered HSQC-NOESY.

## 6. The protein sequence of NDM-1

Figure S9. Sequence of pET27b(+)\_His-NDM-1

LacI

LacI promoter

T7 promoter

Lac operator

Ribosome binding site

PelB sequence

NDM-1 gene

TEV site encoding bases

His-tag

```
TGGCGAATGGGACGCGCCCTGTAGCGGCGCATTAAAGCGCGGCGGGTGTGGTGGTTA
CGCGCAGCGTGACCGCTACACTTGCCAGCGCCCTAGCGCCCCTCCTTTTCGCTTTCTT
CCCTTCCTTTCTCGCCACGTTTCGCCGGCTTTCCCCGTCAAGCTCTAAATCGGGGGCTC
CCTTTAGGGTTCCGATTTAGTGCTTTACGGCACCTCGACCCCAAAAACTTGATTAG
GGTGATGGTTCACGTAGTGGGCCATCGCCCTGATAGACGGTTTTTTCGCCCTTTGACG
TTGGAGTCCACGTTCTTTAATAGTGGACTCTTGTTCCAACTGGAACAACACTCAAC
CCTATCTCGGTCTATTCTTTTGATTTATAAGGGATTTTGCCGATTTTCGGCCTATTGGTT
AAAAAATGAGCTGATTTAACAAAAATTTAACCGGAATTTAACAAAATATTAACGTT
TACAATTCAGGTGGCACTTTTCGGGGAAATGTGCGCGGAACCCCTATTTGTTTATTT
TTCTAAATACATTCAAATATGTATCCGCTCATGAATTAATTCTTAGAAAACTCATC
GAGCATCAAATGAACTGCAATTTATTCATATCAGGATTATCAATACCATATTTTTG
AAAAGCCGTTTCTGTAATGAAGGAGAAAACCTACCGAGGCAGTTCCATAGGATGG
CAAGATCCTGGTATCGGTCTGCGATTCCGACTCGTCCAACATCAATACAACCTATTA
ATTTCCCTCGTCAAAAATAAGGTTATCAAGTGAGAAATCACCATGAGTGACGACTG
AATCCGGTGAGAATGGCAAAAGTTTATGCATTTCTTTCCAGACTTGTTCAACAGGCC
AGCCATTACGCTCGTCATCAAATCACTCGCATCAACCAAACCGTTATTCATTCGTG
ATTGCGCCTGAGCGAGACGAAATACGCGATCGCTGTTAAAAGGACAATTACAAACA
GGAATCGAATGCAACCGGCGCAGGAACACTGCCAGCGCATCAACAATATTTTCACC
TGAATCAGGATATTCTTCTAATACTGGAATGCTGTTTTCCCGGGGATCGCAGTGGT
GAGTAACCATGCATCATCAGGAGTACGGATAAAATGCTTGATGGTCGGAAGAGGCA
TAAATTCGTCAGCCAGTTTAGTCTGACCATCTCATCTGTAACATCATTGGCAACGCT
ACCTTTGCCATGTTTCAGAAACAACACTCTGGCGCATCGGGCTTCCCATAACAATCGATA
GATTGTCGCACCTGATTGCCCGACATTATCGCGAGCCATTTATACCCATATAAATC
AGCATCCATGTTGGAATTTAATCGCGGCCTAGAGCAAGACGTTTCCCGTTGAATATG
GCTCATAACACCCCTTGTATTACTGTTTATGTAAGCAGACAGTTTTATTGTTTCATGAC
```

CAAAATCCCTTAACGTGAGTTTTTCGTTCCACTGAGCGTCAGACCCCGTAGAAAAGAT  
CAAAGGATCTTCTTGAGATCCTTTTTTTCTGCGCGTAATCTGCTGCTTGCAAACAAAA  
AAACCACCGCTACCAGCGGTGGTTTTGTTGCCGGATCAAGAGCTACCAACTCTTTTT  
CCGAAGGTAACCTGGCTTCAGCAGAGCGCAGATACCAAATACTGTCCTTCTAGTGTAG  
CCGTAGTTAGGCCACCACTTCAAGAACTCTGTAGCACCGCCTACATACCTCGCTCTG  
CTAATCCTGTTACCAGTGGCTGCTGCCAGTGGCGATAAGTCGTGTCTTACCGGGTTG  
GACTCAAGACGATAGTTACCGGATAAGGCGCAGCGGTTCGGGCTGAACGGGGGGTTC  
GTGCACACAGCCAGCTTGGAGCGAACGACCTACACCGAACTGAGATACCTACAGC  
GTGAGCTATGAGAAAGCGCCACGCTTCCCGAAGGGAGAAAGGCGGACAGGTATCCG  
GTAAGCGGCAGGGTCGGAACAGGAGAGCGCACGAGGGAGCTTCCAGGGGGAAACG  
CCTGGTATCTTTATAGTCCTGTGCGGTTTTCGCCACCTCTGACTTGAGCGTCGATTTTT  
GTGATGCTCGTCAGGGGGGCGGAGCCTATGGAAAACGCCAGCAACGCGGCCTTTT  
TACGGTTCCTGGCCTTTTGTGCTGGCCTTTTGTCTACATGTTCTTTCCTGCGTTATCCCCT  
GATTCTGTGGATAACCGTATTACCGCCTTTGAGTGAGCTGATACCGCTCGCCGCAGC  
CGAACGACCGAGCGCAGCGAGTCAGTGAGCGAGGAAGCGGAAGAGCGCCTGATGC  
GGTATTTTTCTCCTTACGCATCTGTGCGGTATTTACACCGCATATATGGTGCACCTCTC  
AGTACAATCTGCTCTGATGCCGCATAGTTAAGCCAGTATACTCCGCTATCGCTAC  
GTGACTGGGTCATGGCTGCGCCCCGACACCCGCCAACACCCGCTGACGCGCCCTGA  
CGGGCTTGTCTGCTCCCGGCATCCGCTTACAGACAAGCTGTGACCGTCTCCGGGAGC  
TGCATGTGTCAGAGGTTTTACCGTCATCACCGAAACGCGCGAGGCAGCTGCGGTAA  
AGCTCATCAGCGTGGTCGTGAAGCGATTACAGATGTCTGCCTGTTTATCCGCGTCC  
AGCTCGTTGAGTTTCTCCAGAAGCGTTAATGTCTGGCTTCTGATAAAGCGGGCCATG  
TTAAGGGCGGTTTTTTCCTGTTTGGTCACTGATGCCTCCGTGTAAGGGGGATTTCTGT  
TCATGGGGGTAATGATACCGATGAAACGAGAGAGGATGCTCACGATACGGGTTACT  
GATGATGAACATGCCCGTTACTGGAACGTTGTGAGGGTAAACAACCTGGCGGTATG  
GATGCGGCGGGACCAGAGAAAAATCACTCAGGGTCAATGCCAGCGCTTCGTTAATA  
CAGATGTAGGTGTTCCACAGGGTAGCCAGCAGCATCCTGCGATGCAGATCCGGAAC  
ATAATGGTGCAGGGCGCTGACTTCCGCGTTTCCAGACTTTACGAAACACGGAAACCG  
AAGACCATTGATGTTGTTGCTCAGGTCGCAGACGTTTTTGCAGCAGCAGTCGCTTAC  
GTTTCGCTCGCGTATCGGTGATTCATTCTGCTAACCAGTAAGGCAACCCCGCCAGCCT  
AGCCGGGTCTCAACGACAGGAGCAGATCATGCGCACCCGTGGGGCCGCCATGCC  
GGCGATAATGGCCTGCTTCTCGCCGAAACGTTTTGGTGGCGGGACCAGTGACGAAGG  
CTTGAGCGAGGGCGTGCAAGATTCCGAATACCGCAAGCGACAGGCCGATCATCGTC  
GCGCTCCAGCGAAAGCGGTCTCGCCGAAAATGACCCAGAGCGCTGCCGGCACCTG  
TCCTACGAGTTGCATGATAAAGAAGACAGTCATAAGTGCGGGCAGCAGATAGTCATGC  
CCC GCGCCACCGGAAGGAGCTGACTGGGTTGAAGGCTCTCAAGGGCATCGGTGCA  
GATCCCGGTGCCTAATGAGTGAGCTAACTTACATTAATTGCGTTGCGCTCACTGCCC  
GCTTTCAGTCGGGAAACCTGTCGTGCCAGCTGCATTAATGAATCGGCCAACGCGCG  
GGGAGAGGCGGTTTTGCGTATTGGGCGCCAGGGTGGTTTTTCTTTTACCAGTGAGAC  
GGGCAACAGCTGATTGCCCTTACCGCCTGGCCCTGAGAGAGTTGCAGCAAGCGGT  
CCACGCTGGTTTTGCCCCAGCAGGCGAAAATCCTGTTTGATGGTGGTTAACGGCGGGA  
TATAACATGAGCTGTCTTCGGTATCGTCGTATCCC ACTACCGAGATATCCGCACCAA  
CGCGCAGCCCGACTCGGTAATGGCGCGCATTGCGCCAGCGCCATCTGATCGTTGG  
CAACCAGCATCGCAGTGGGAACGATGCCCTCATTGAGCATTGTCATGGTTTTGTTGAA  
AACCGGACATGGCACTCCAGTCGCCTTCCC GTTCCGCTATCGGCTGAATTTGATTGC  
GAGTGAGATATTTATGCCAGCCAGCCAGACGCGAGACGCGCCGAGACAGAACTAAT



GGGCCCCGCTAACAGCGCGATTTGCTGGTGACCCAATGCGACCAGATGCTCCACGCC  
CAGTCGCGTACCGTCTTCATGGGAGAAAATAATACTGTTGATGGGTGTCTGGTCAGA  
GACATCAAGAAATAACGCCGGAACATTAGTGCAGGCAGCTTCCACAGCAATGGCAT  
CCTGGTCATCCAGCGGATAGTTAATGATCAGCCCACTGACGCGTTGCGCGAGAAGAT  
TGTGCACCGCCGCTTTACAGGCTTCGACGCCGCTTCGTTCTACCATCGACACCACCA  
CGCTGGCACCCAGTTGATCGGCGCGAGATTTAATCGCCGCGACAATTTGCGACGGC  
GCGTGCAGGGCCAGACTGGAGGTGGCAACGCCAATCAGCAACGACTGTTTGCCCGC  
CAGTTGTTGTGCCACGCGGTTGGGAATGTAATTCAGCTCCGCCATCGCCGCTTCCAC  
TTTTCCCGCGTTTTTCGCAGAAACGTGGCTGGCCTGGTTCACCACGCGGGAACGGT  
CTGATAAGAGACACCGGCATACTCTGCGACATCGTATAACGTTACTGGTTTACATT  
CACCACCCTGAATTGACTCTCTTCCGGGCGCTATCATGCCATACCGCGAAAGGTTTT  
GCGCCATTTCGATGGTGTCCGGGATCTCGACGCTCTCCCTTATGCGACTCCTGCATTA  
GGAAGCAGCCCAGTAGTAGGTTGAGGCCGTTGAGCACCGCCGCCGCAAGGAATGGT  
GCATGCAAGGAGATGGCGCCCAACAGTCCCCCGGCCACGGGGCCTGCCACCATAACC  
CACGCCGAAACAAGCGCTCATGAGCCCGAAGTGGCGAGCCCGATCTTCCCCATCGG  
TGATGTCGGCGATATAGGCGCCAGCAACCGCACCTGTGGCGCCGGTGATGCCGGCC  
ACGATGCGTCCGGCGTAGAGGATCGAGATCTCGATCCCGCGAAATTAATACGACTC  
ACTATAGGGGAATTGTGAGCGGATAACAATTCCCTCTAGAAATAATTTTGTTTAAC  
TTAAGAGGAGATATACATATGAAATACCTGCTGCCGACCGCTGCTGCTGGTCTGC  
TGCTCCTCGCTGCCAGCCGGCGATGGCCATGgctgcaaccatcatcatcatcttctggttagatctgg  
gtaccgagaacctgtaactccaaggCAGCAAATGGAACTGGCGACCAACGGTTTGGCGATCTGG  
TTTTCCGCCAGCTCGCACCGAATGTCTGGCAGCACACTTCCTATCTCGACATGCCGG  
GTTTCGGGGCAGTCGCTTCCAACGGTTTGATCGTCAGGGATGGCGGCCGCGTGCTGG  
TGGTCGATACCGCCTGGACCGATGACCAGACCGCCAGATCCTCAACTGGATCAAG  
CAGGAGATCAACCTGCCGGTCGCGCTGGCGGTGGTGACTCACGCGCATCAGGACAA  
GATGGGCGGTATGGACGCGCTGCATGCGGCGGGGATTGCGACTTATGCCAATGCGT  
TGTCGAACCAGCTTGCCCCGCAAGAGGGGATGGTTGCGGCGCAACACAGCCTGACT  
TTCGCCGCCAATGGCTGGGTGGAACCAGCAACCGCGCCCACTTTGGCCCCGCTCAAG  
GTATTTTACCCCGGCCCGGCCACACCAGTGACAATATCACCGTTGGGATCGACGGC  
ACCGACATCGCTTTTGGTGGCTGCCTGATCAAGGACAGCAAGGCCAAGTCGCTCGG  
CAATCTCGGTGATGCCGACACTGAGCACTACGCCGCGTCAGCGCGCGCTTTGGTGC  
GGCGTTCCCAAGGCCAGCATGATCGTGATGAGCCATTCGCCCCCGATAGCCGCGC  
CGCAATCACTCATACGGCCCGCATGGCCGACAAGCTGCGCTAATGAGGATCCGAAT  
TCGAGCTCCGTCGACAAGCTTGCGGCCGCACTCGAGATCAAACGGGCTAGCCAGCC  
AGAACTCGCCCCGGAAGACCCCGAGGATGTCGAGCACCACCACCACCACCTGAG  
ATCCGGCTGCTAACAAAGCCCGAAAGGAAGCTGAGTTGGCTGCTGCCACCGCTGAG  
CAATAACTAGCATAAACCCTTGGGGCCTCTAAACGGGTCTTGAGGGGTTTTTTGCTG  
AAAGGAGGAACTATATCCGGAT

**Figure S10.** Protein sequence of the produced NDM-1 after TEV cleavage:

GQQMETGDQRFGDLVFRQLAPNVWQHTSYLDMPGFGAVASNGLIVRDGGRVLVVDTA  
WTDDQTAQILNWIKEINLPVALAVVTHAHQDKMGGMDALHAAGIATYANALSNQLA  
PQEGMVAAQHSLTFAANGWVEPATAPNFGPLKVFYPPGHTSDNITVGIDGTDIAFGGC  
LIKDSKAKSLGNLGDADTEHYAASARAFGAAFP KASMIVMSHSAPDSRAAITHARMA  
DKLR

## 7. NMR spectra of the synthesized compounds

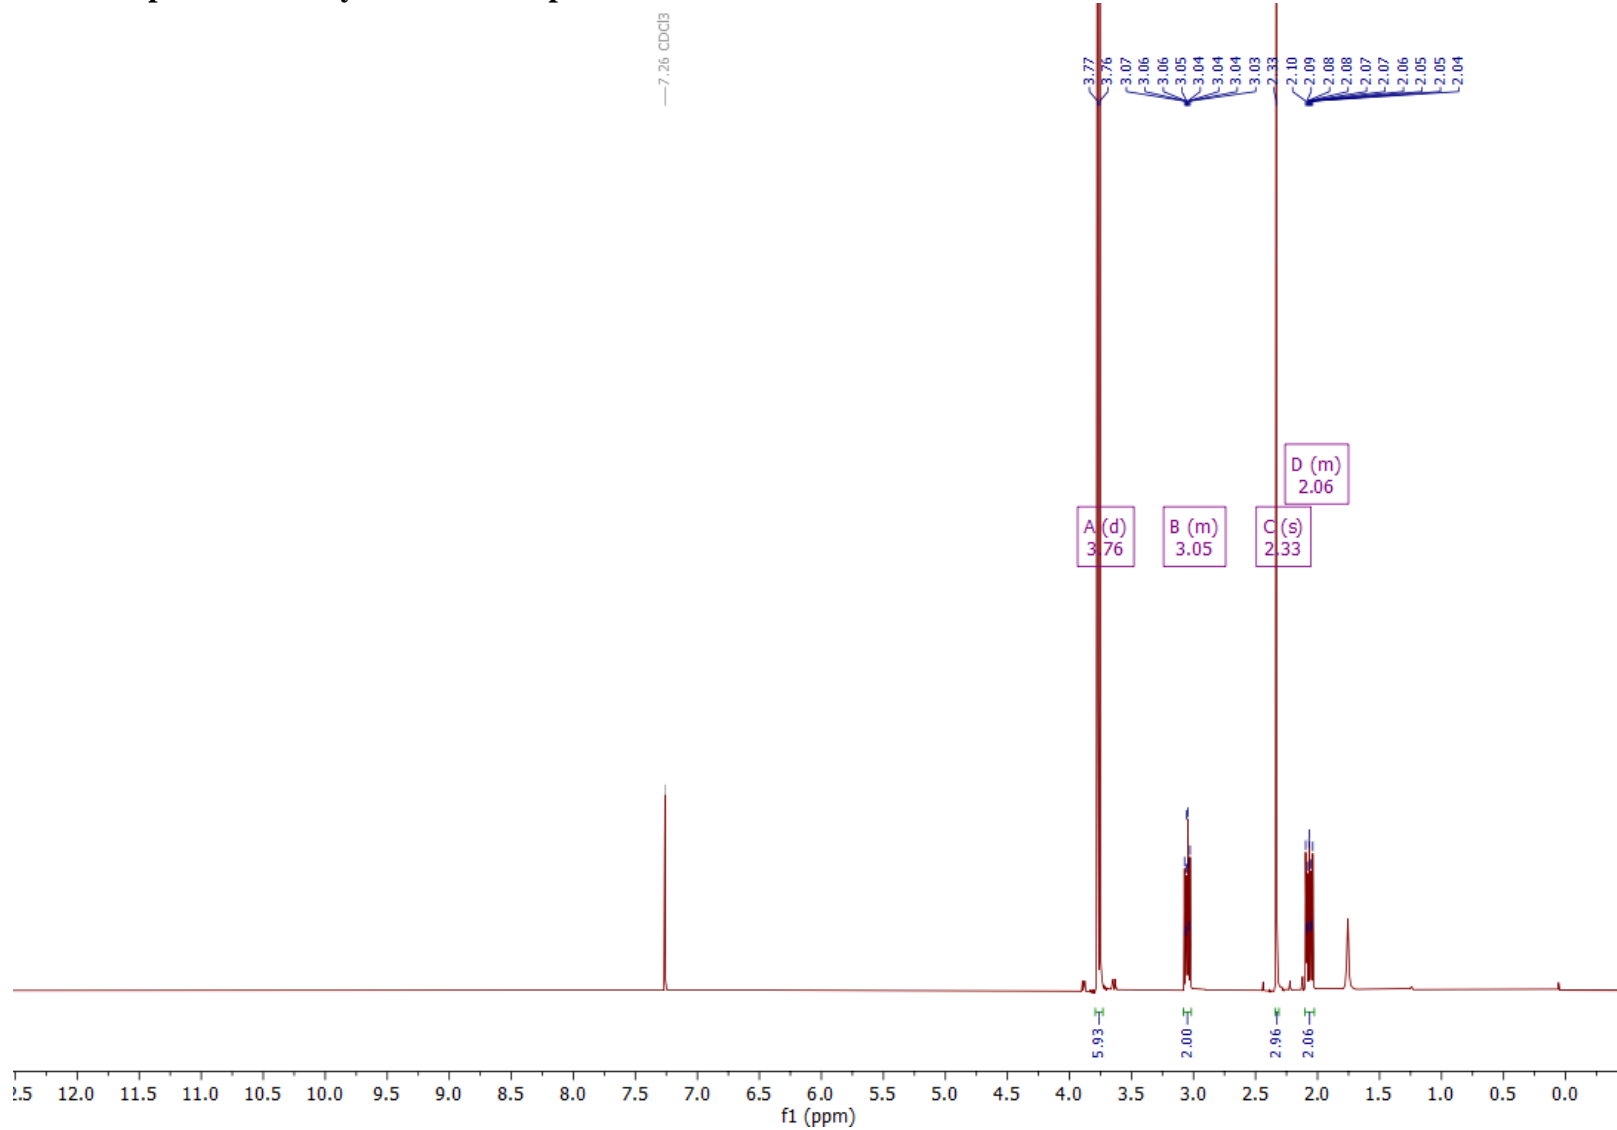

Figure S11. <sup>1</sup>H NMR spectrum of 4.

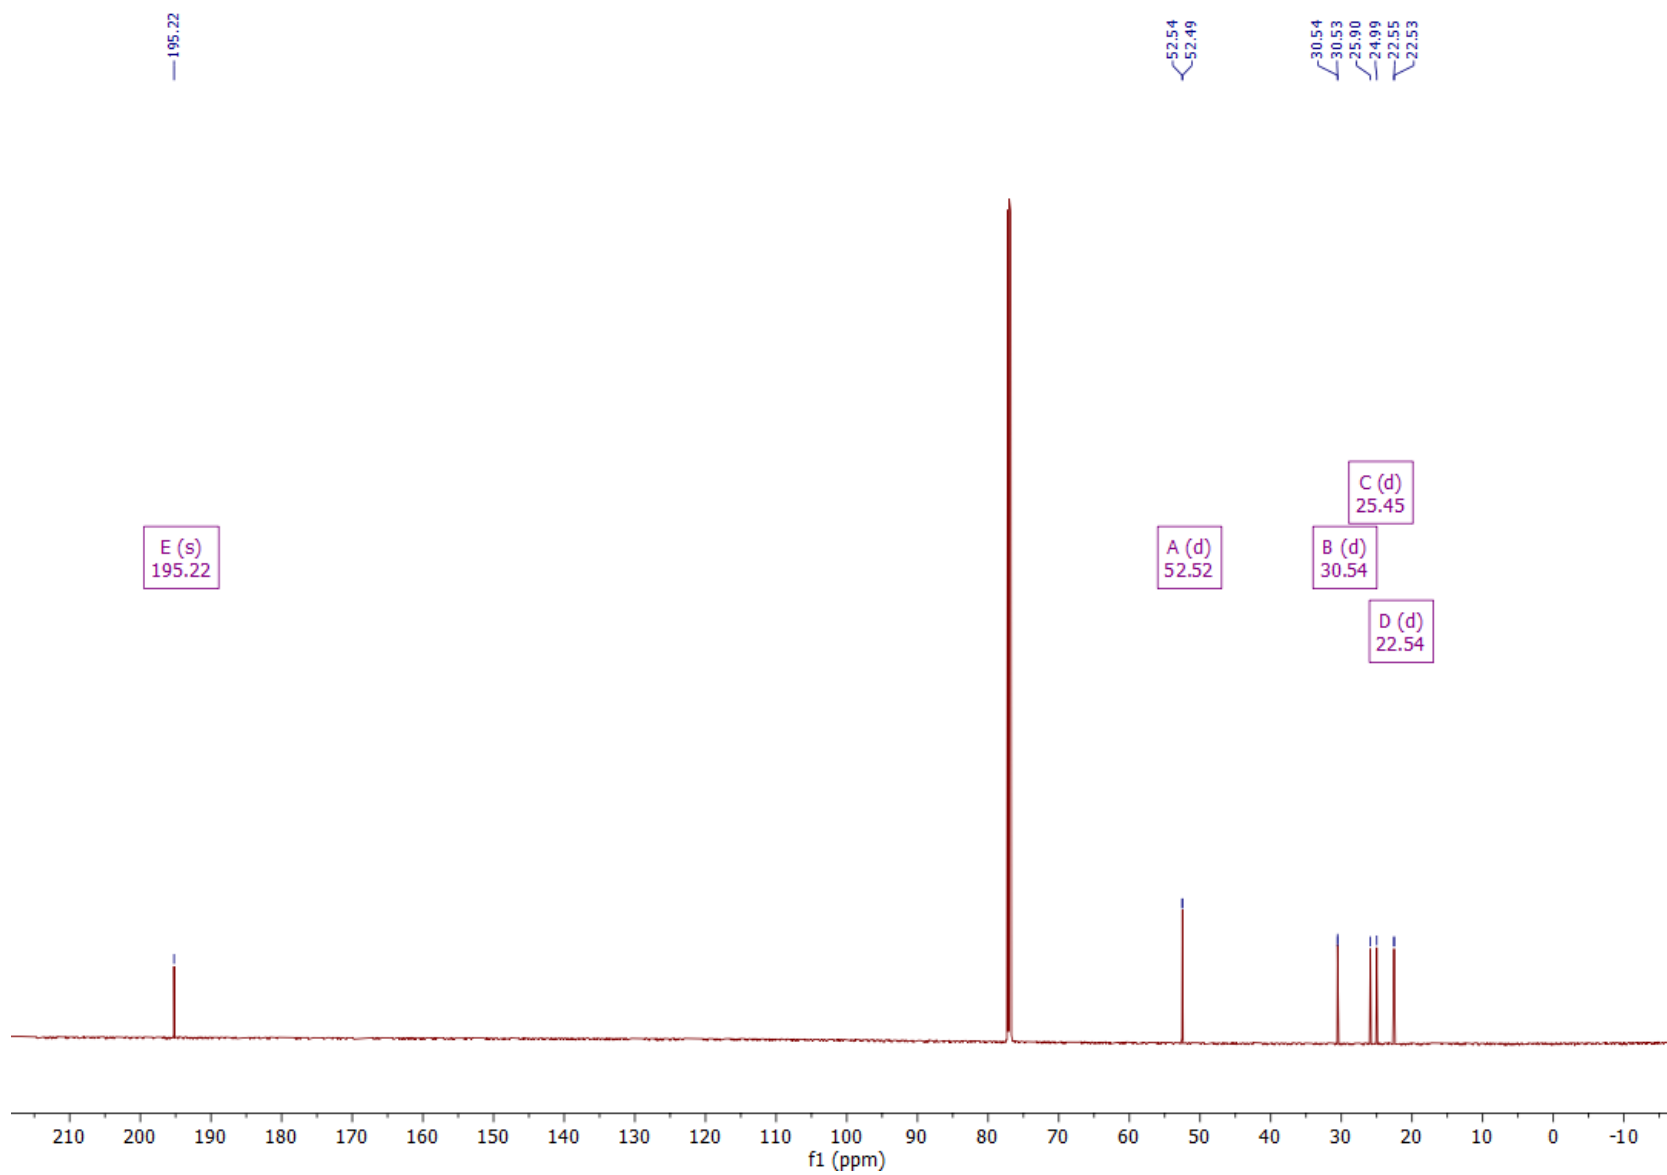

**Figure S12.**  $^{13}\text{C}$  NMR spectrum of **4**.

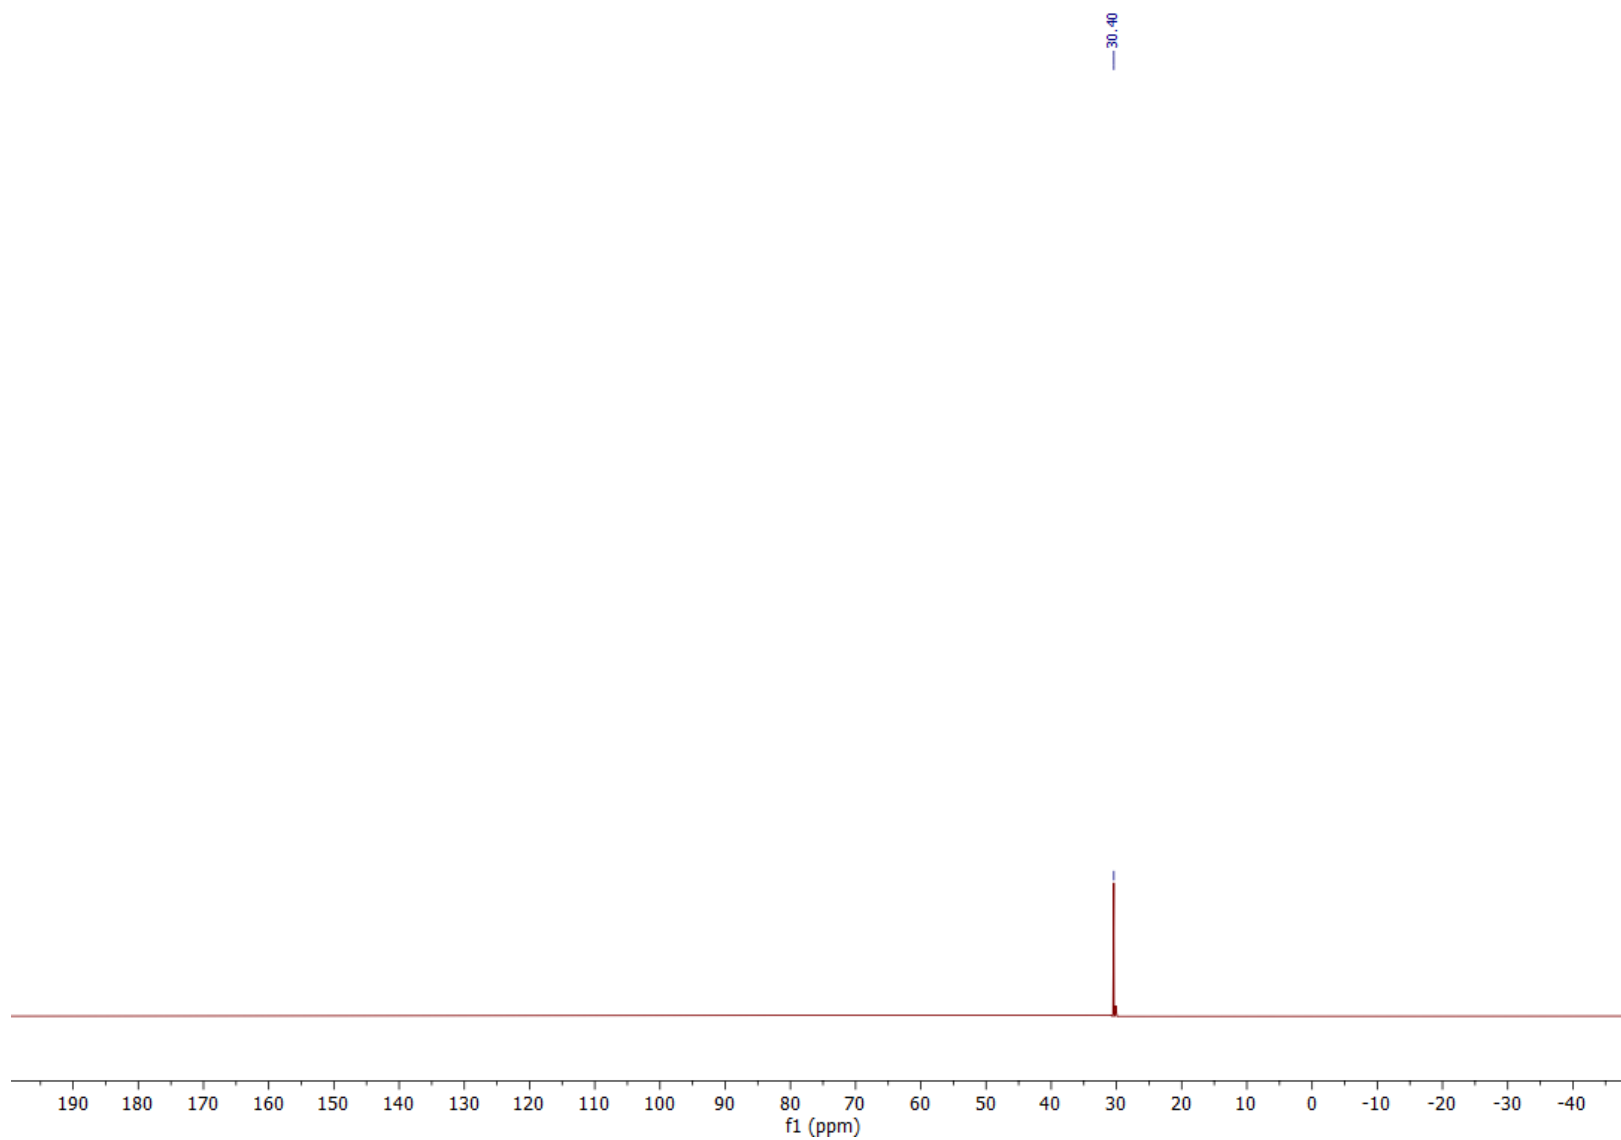

**Figure S13.**  $^{31}\text{P}$  NMR spectrum of **4**.

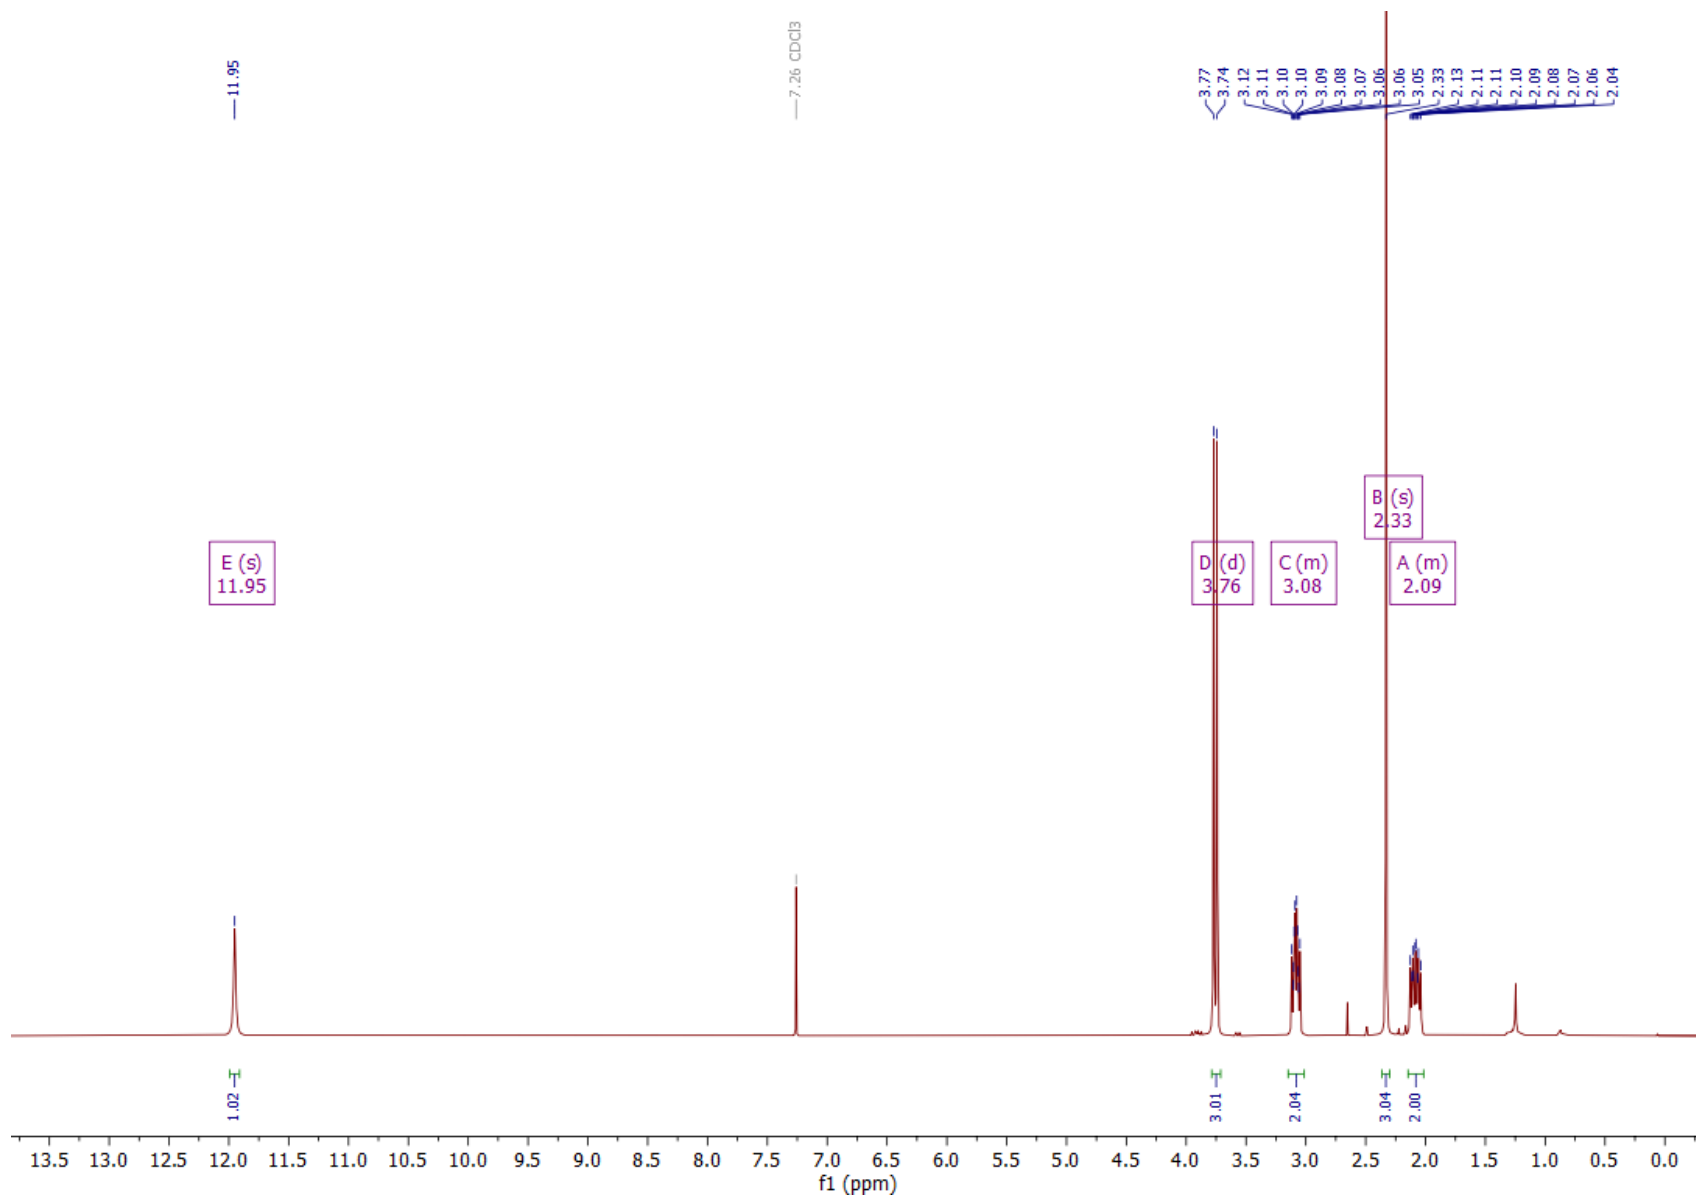

Figure S14. <sup>1</sup>H NMR spectrum of **5**.

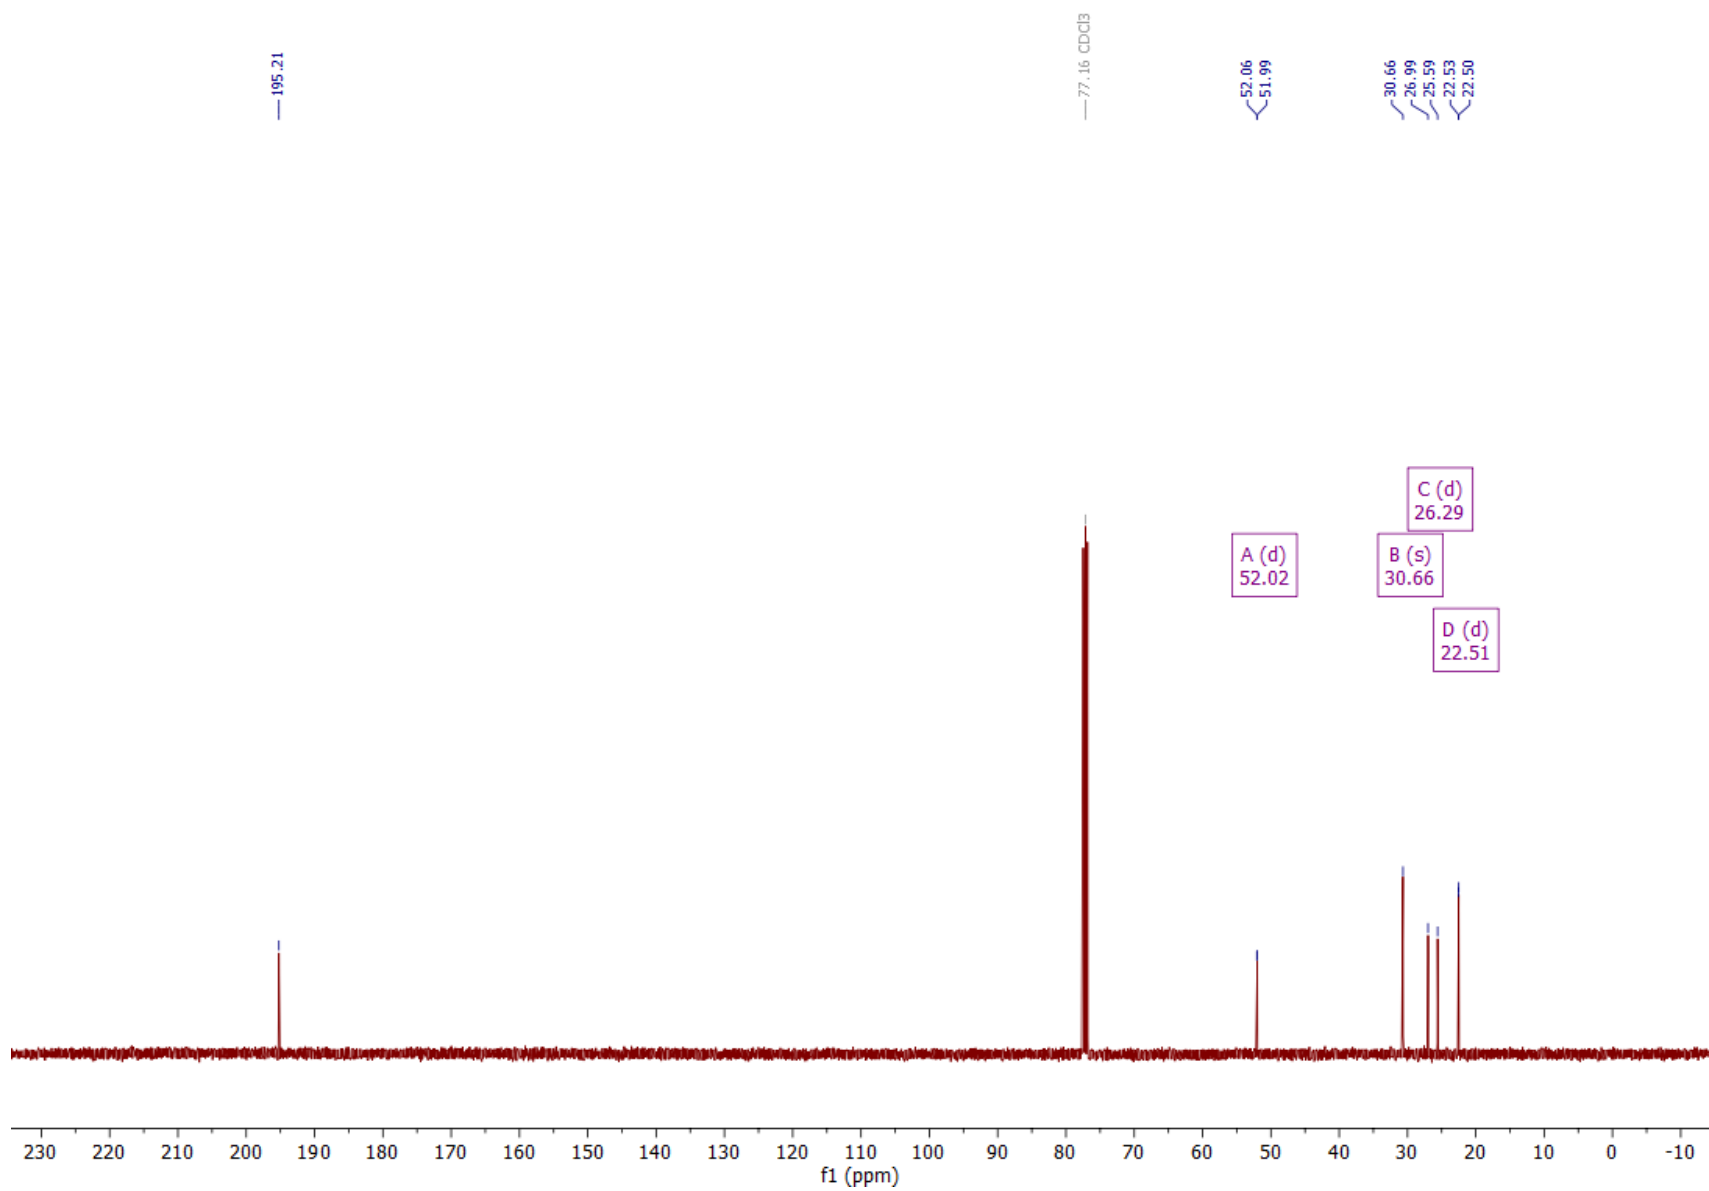

Figure S15.  $^{13}\text{C}$  NMR spectrum of **5**.

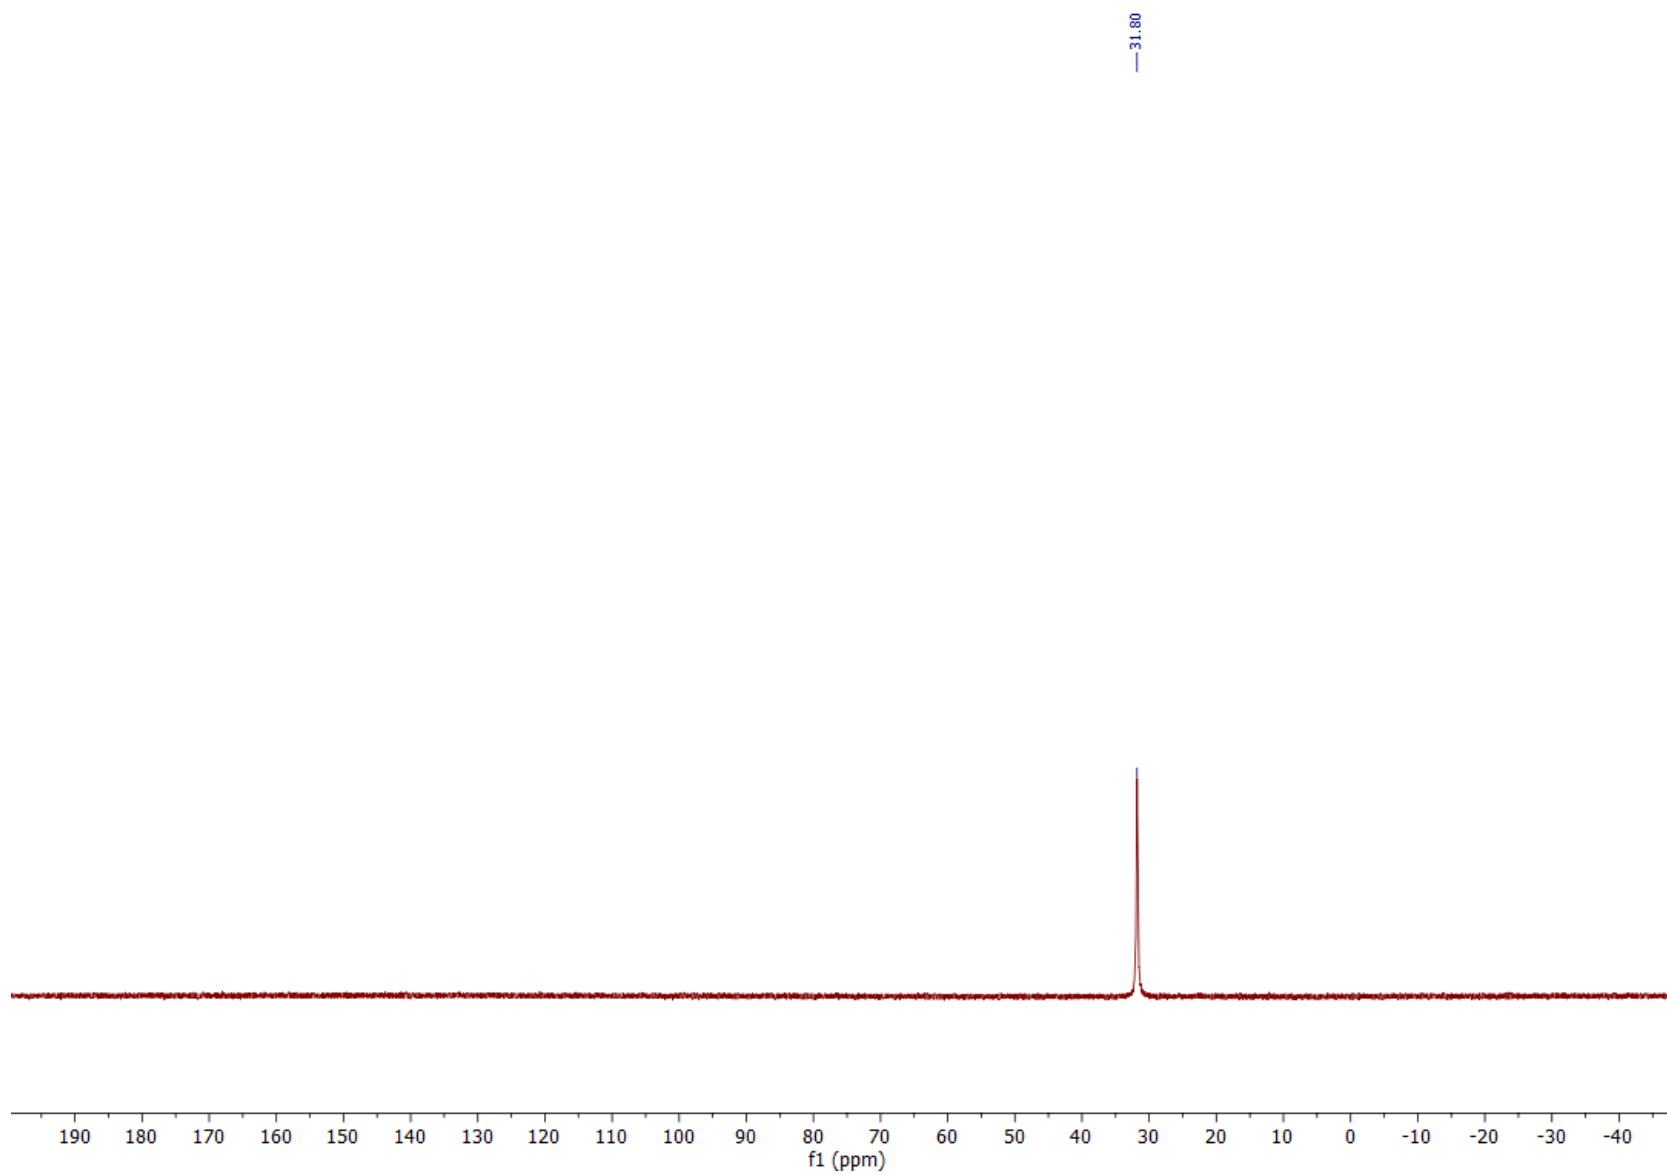

**Figure S16.**  $^{31}\text{P}$  NMR spectrum of **5**.



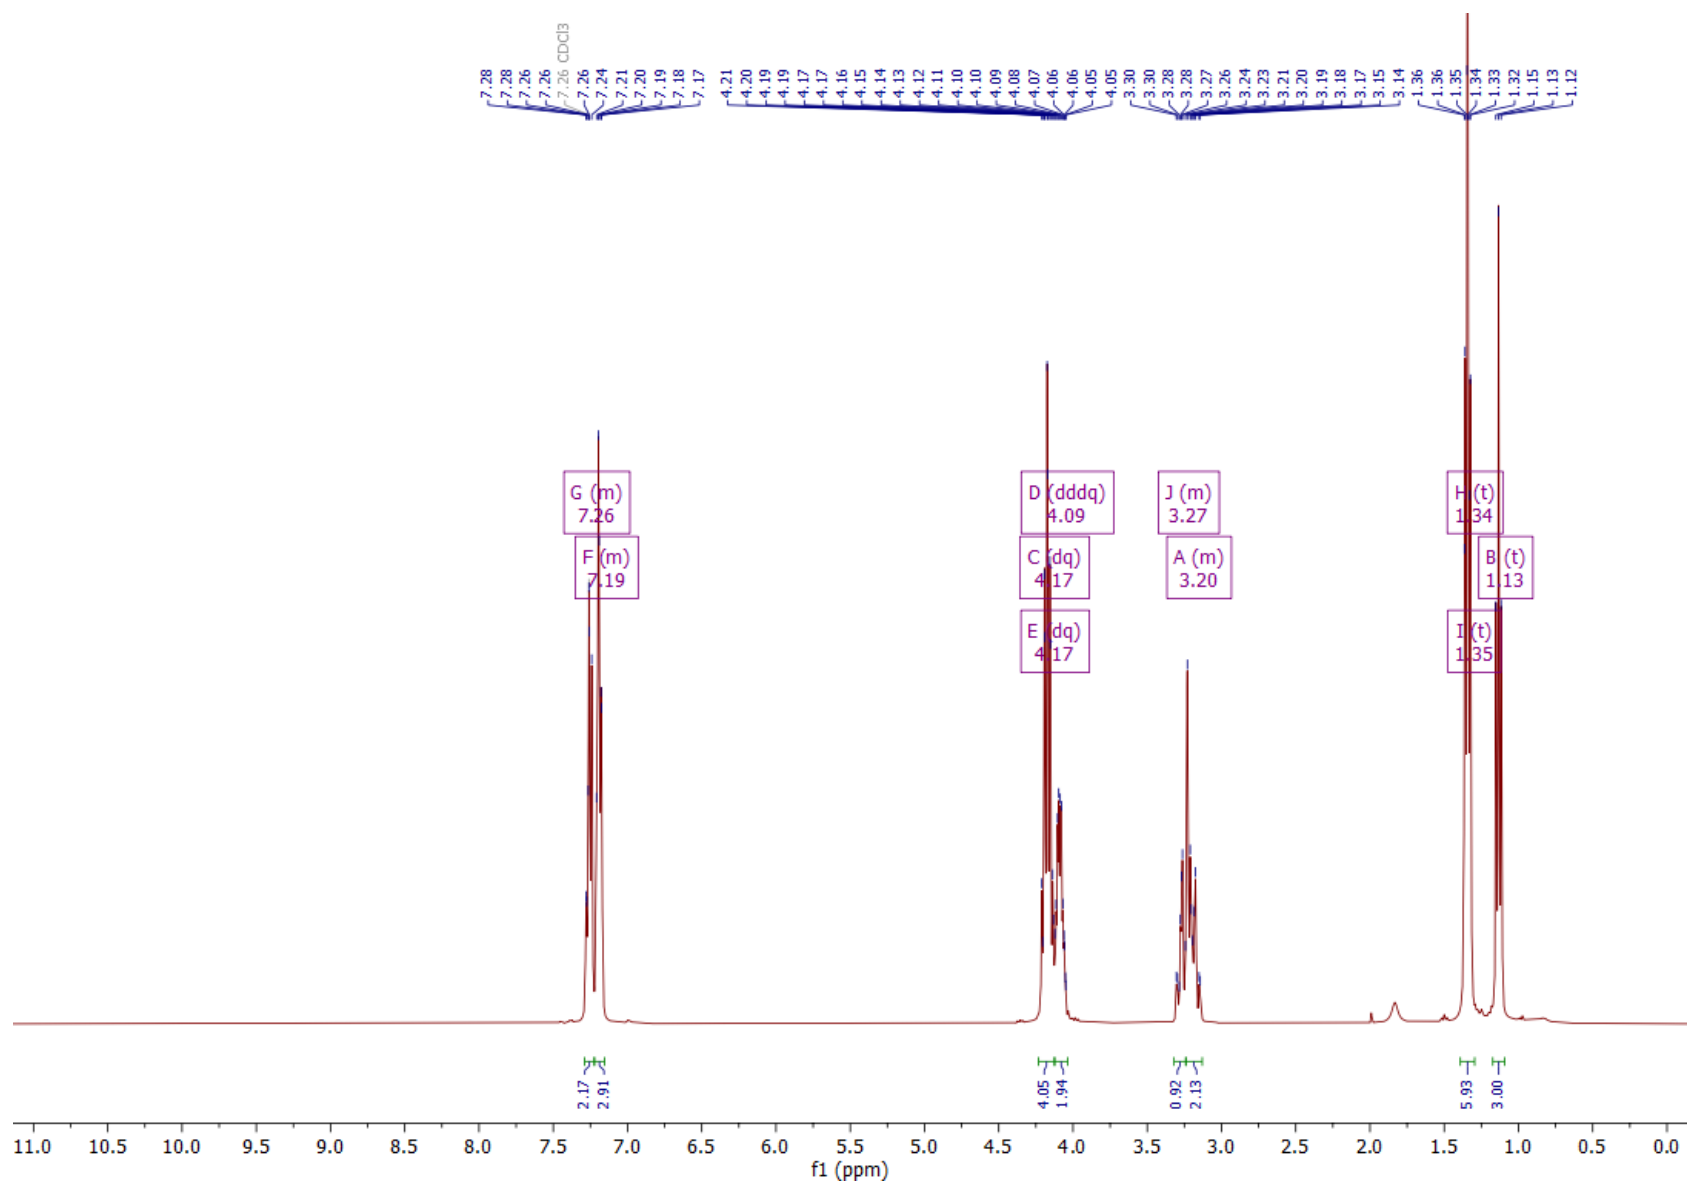

Figure S17.  $^1\text{H}$  NMR spectrum of 7.

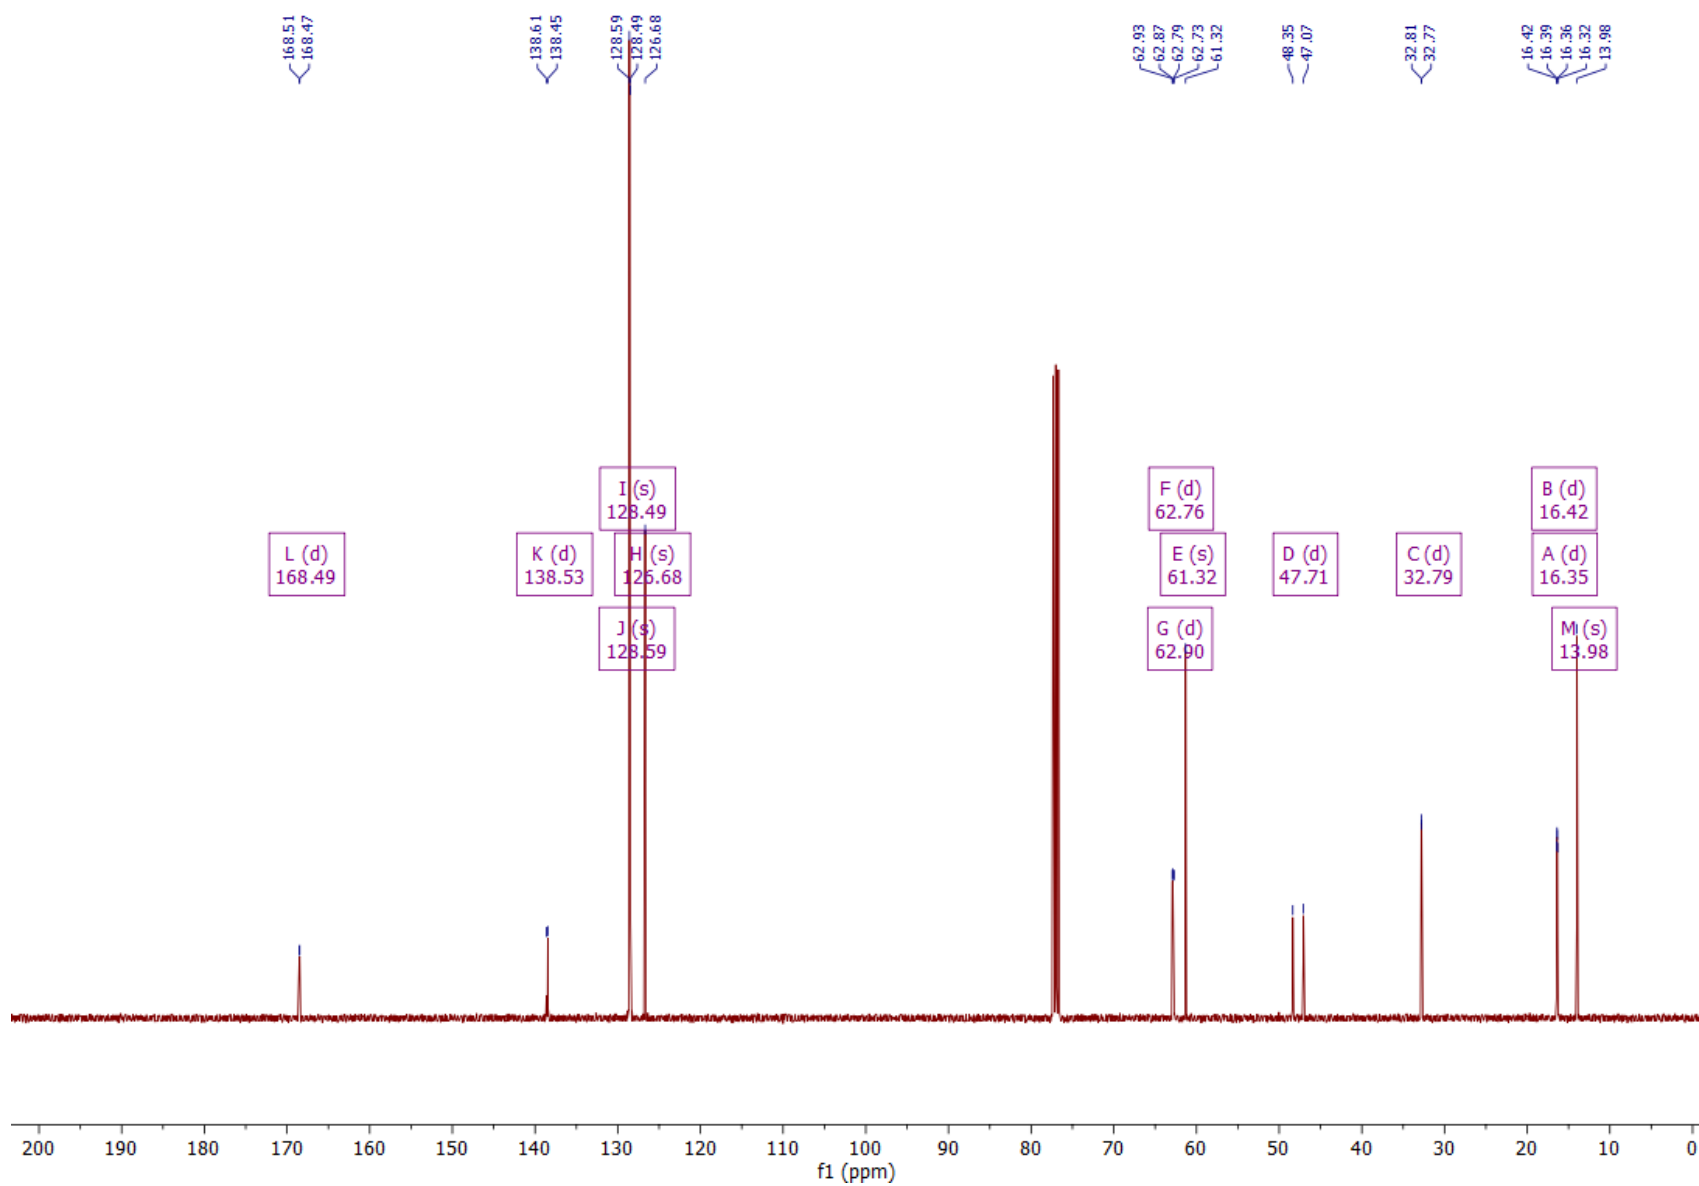

Figure S18.  $^{13}\text{C}$  NMR spectrum of 7.

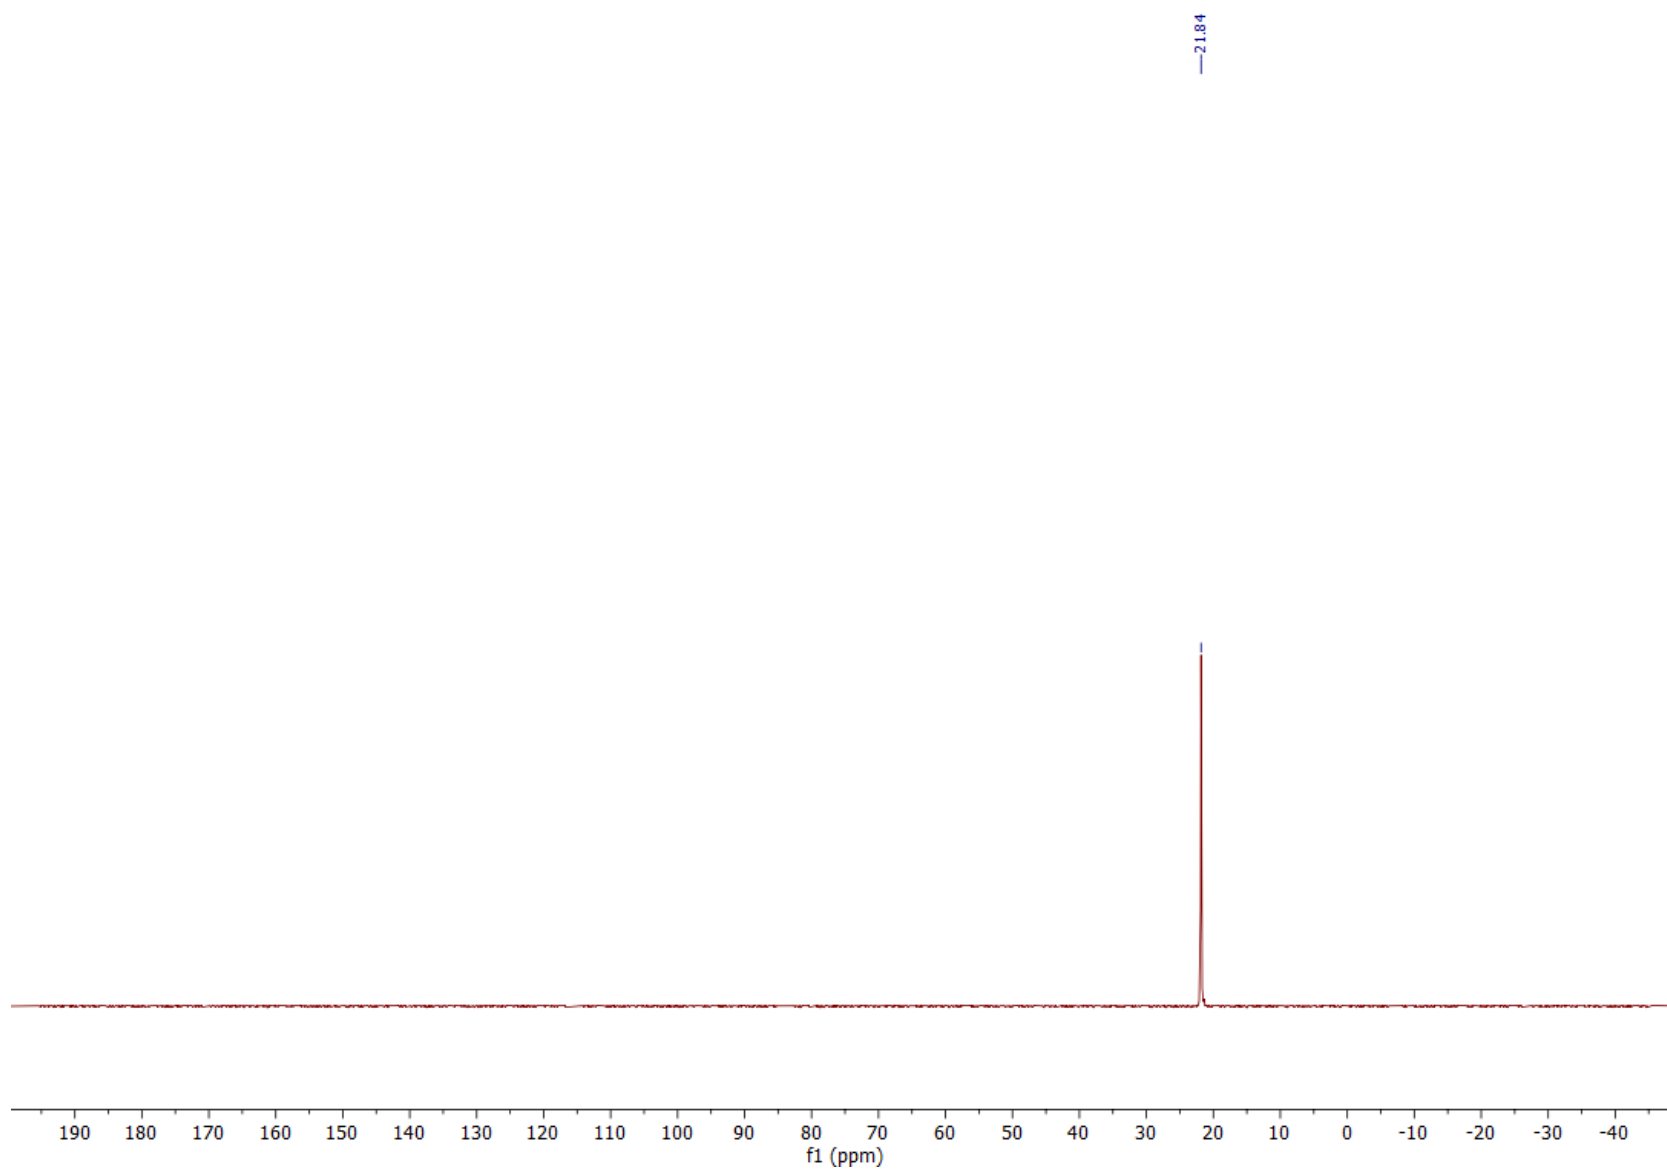

**Figure S19.**  $^{31}\text{P}$  NMR spectrum of **7**.

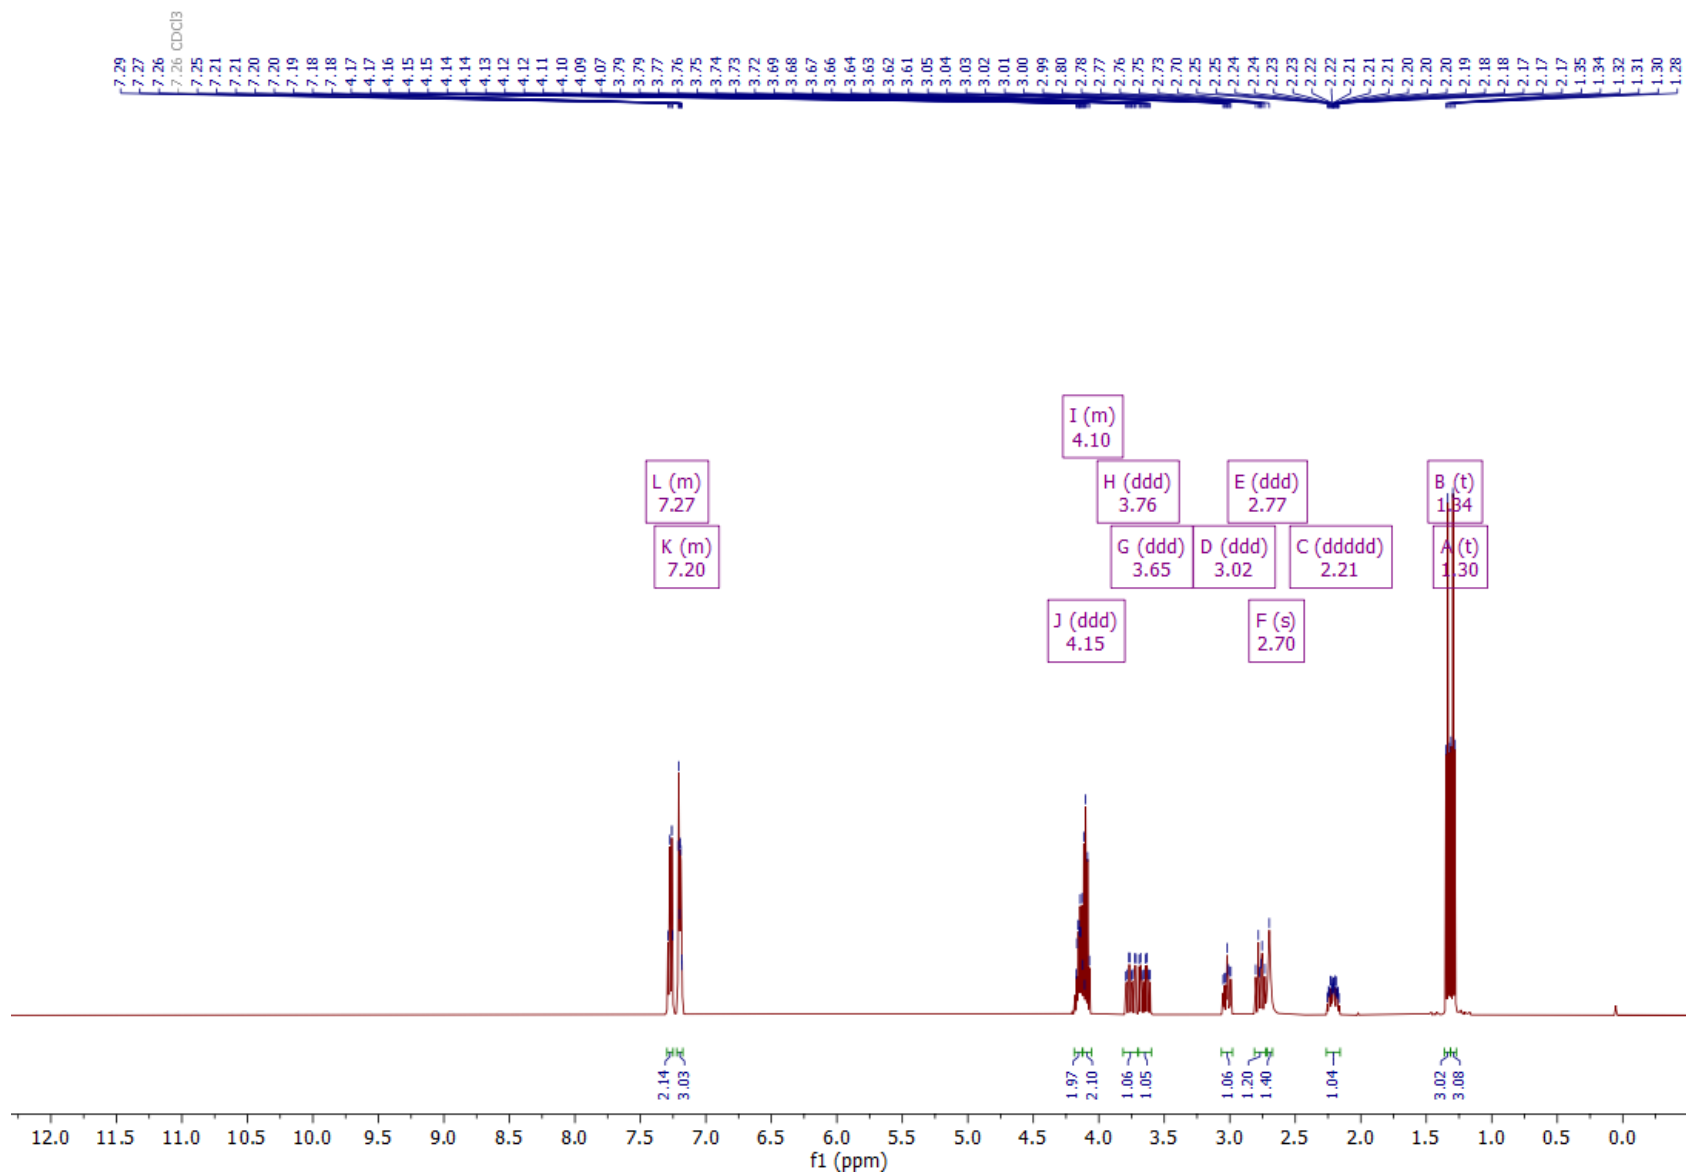

Figure S20. <sup>1</sup>H NMR spectrum of **8**.

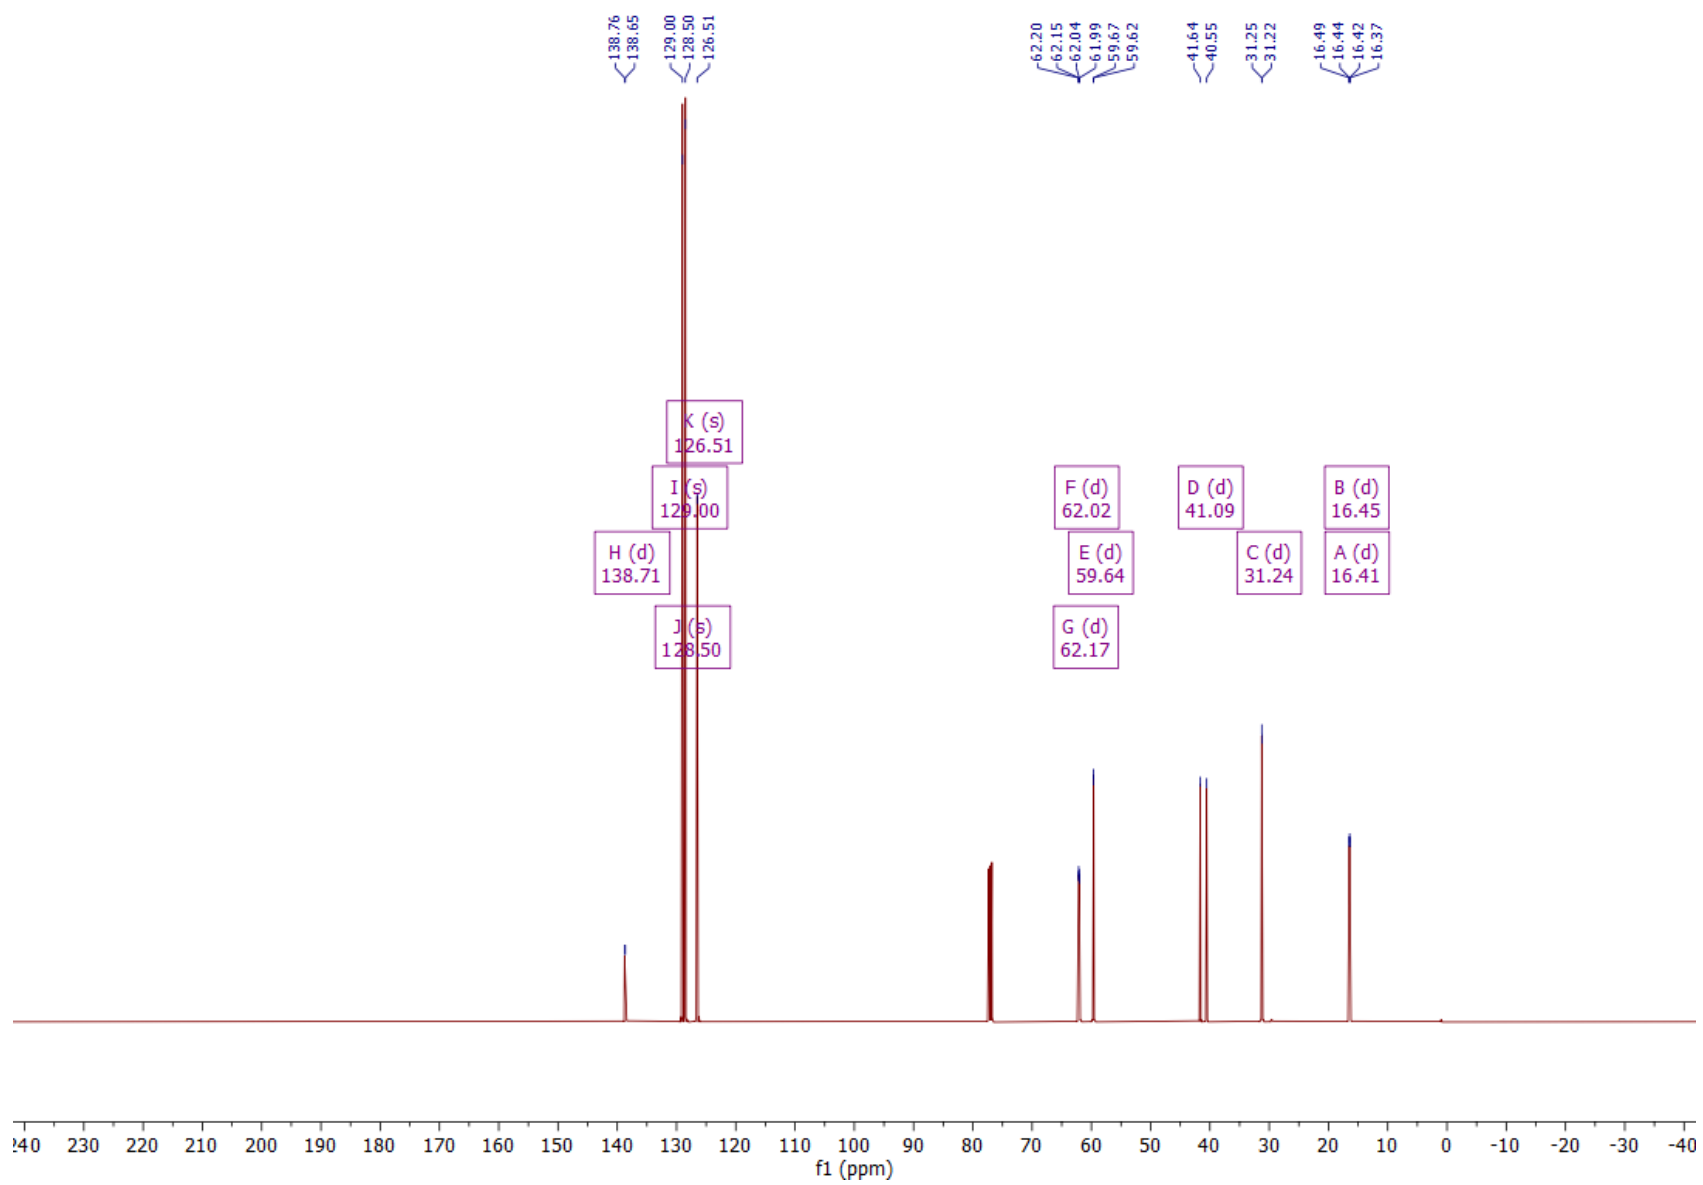

**Figure S21.** <sup>13</sup>C NMR spectrum of **8**.

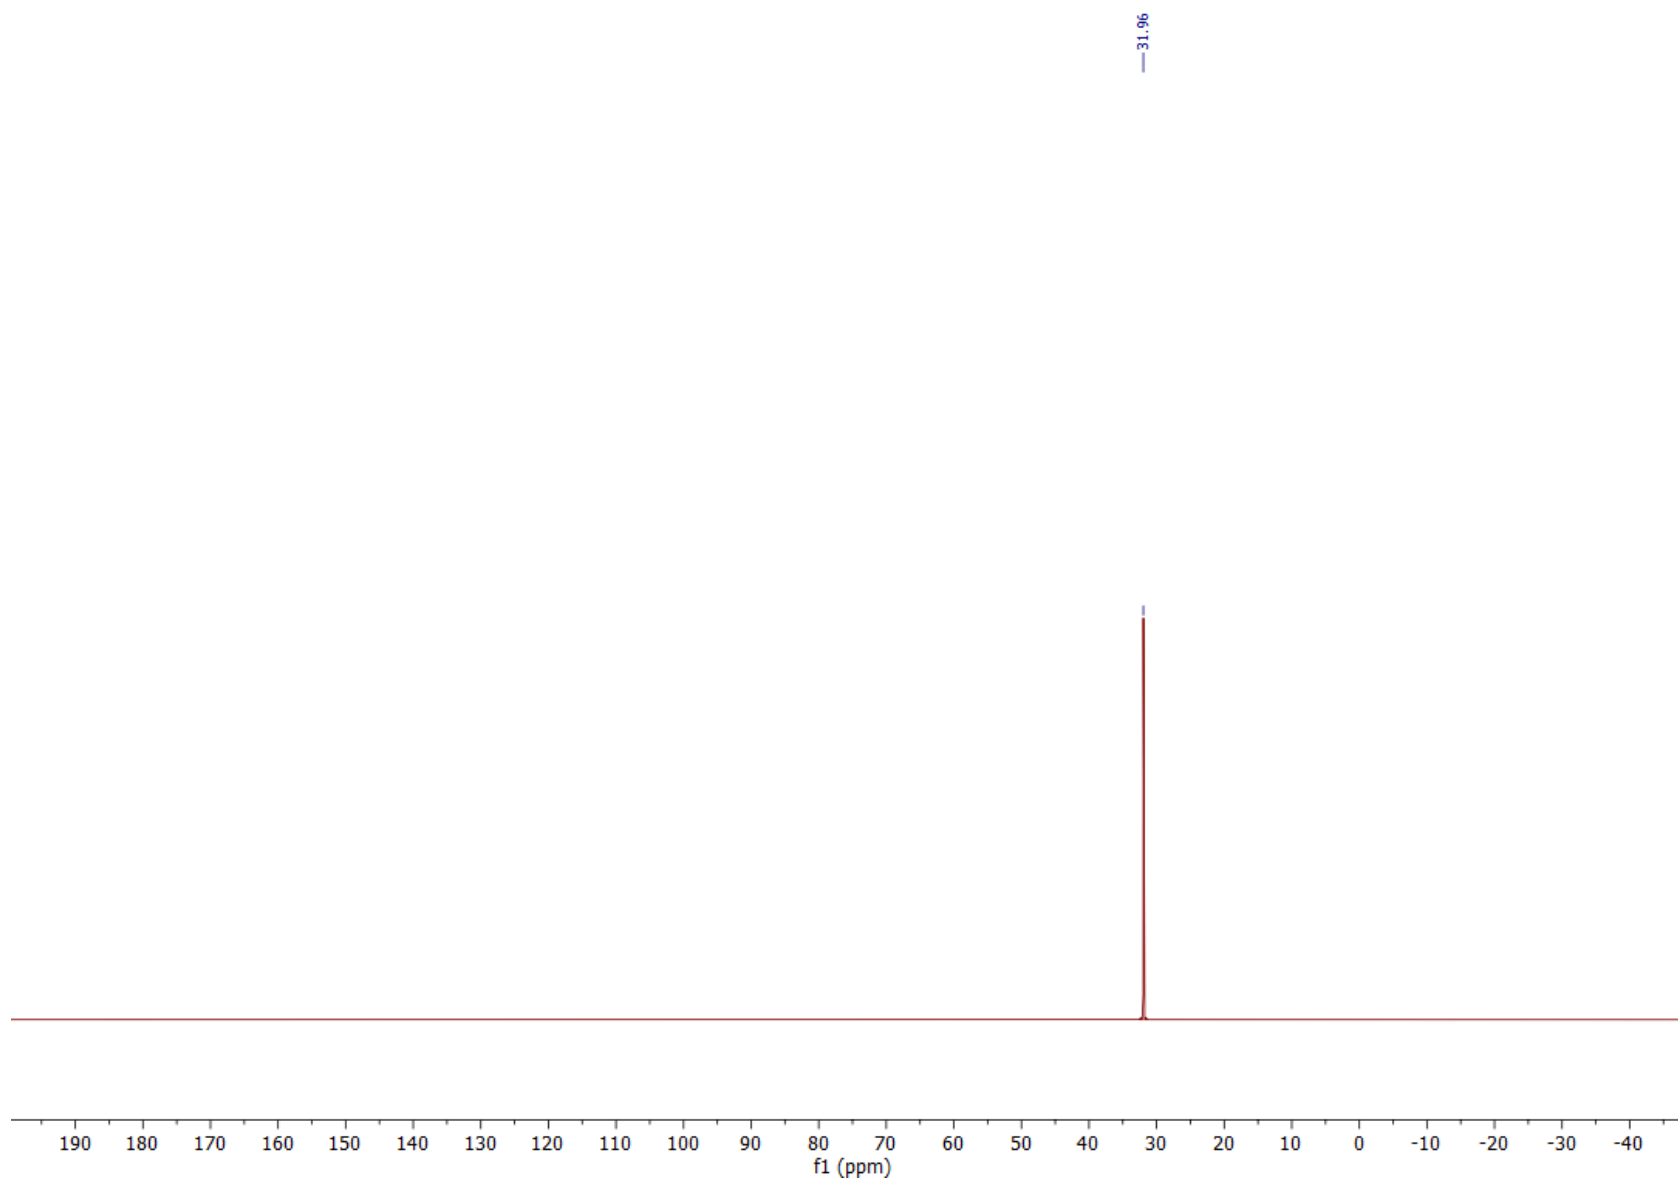

**Figure S22.**  $^{31}\text{P}$  NMR spectrum of **8**.

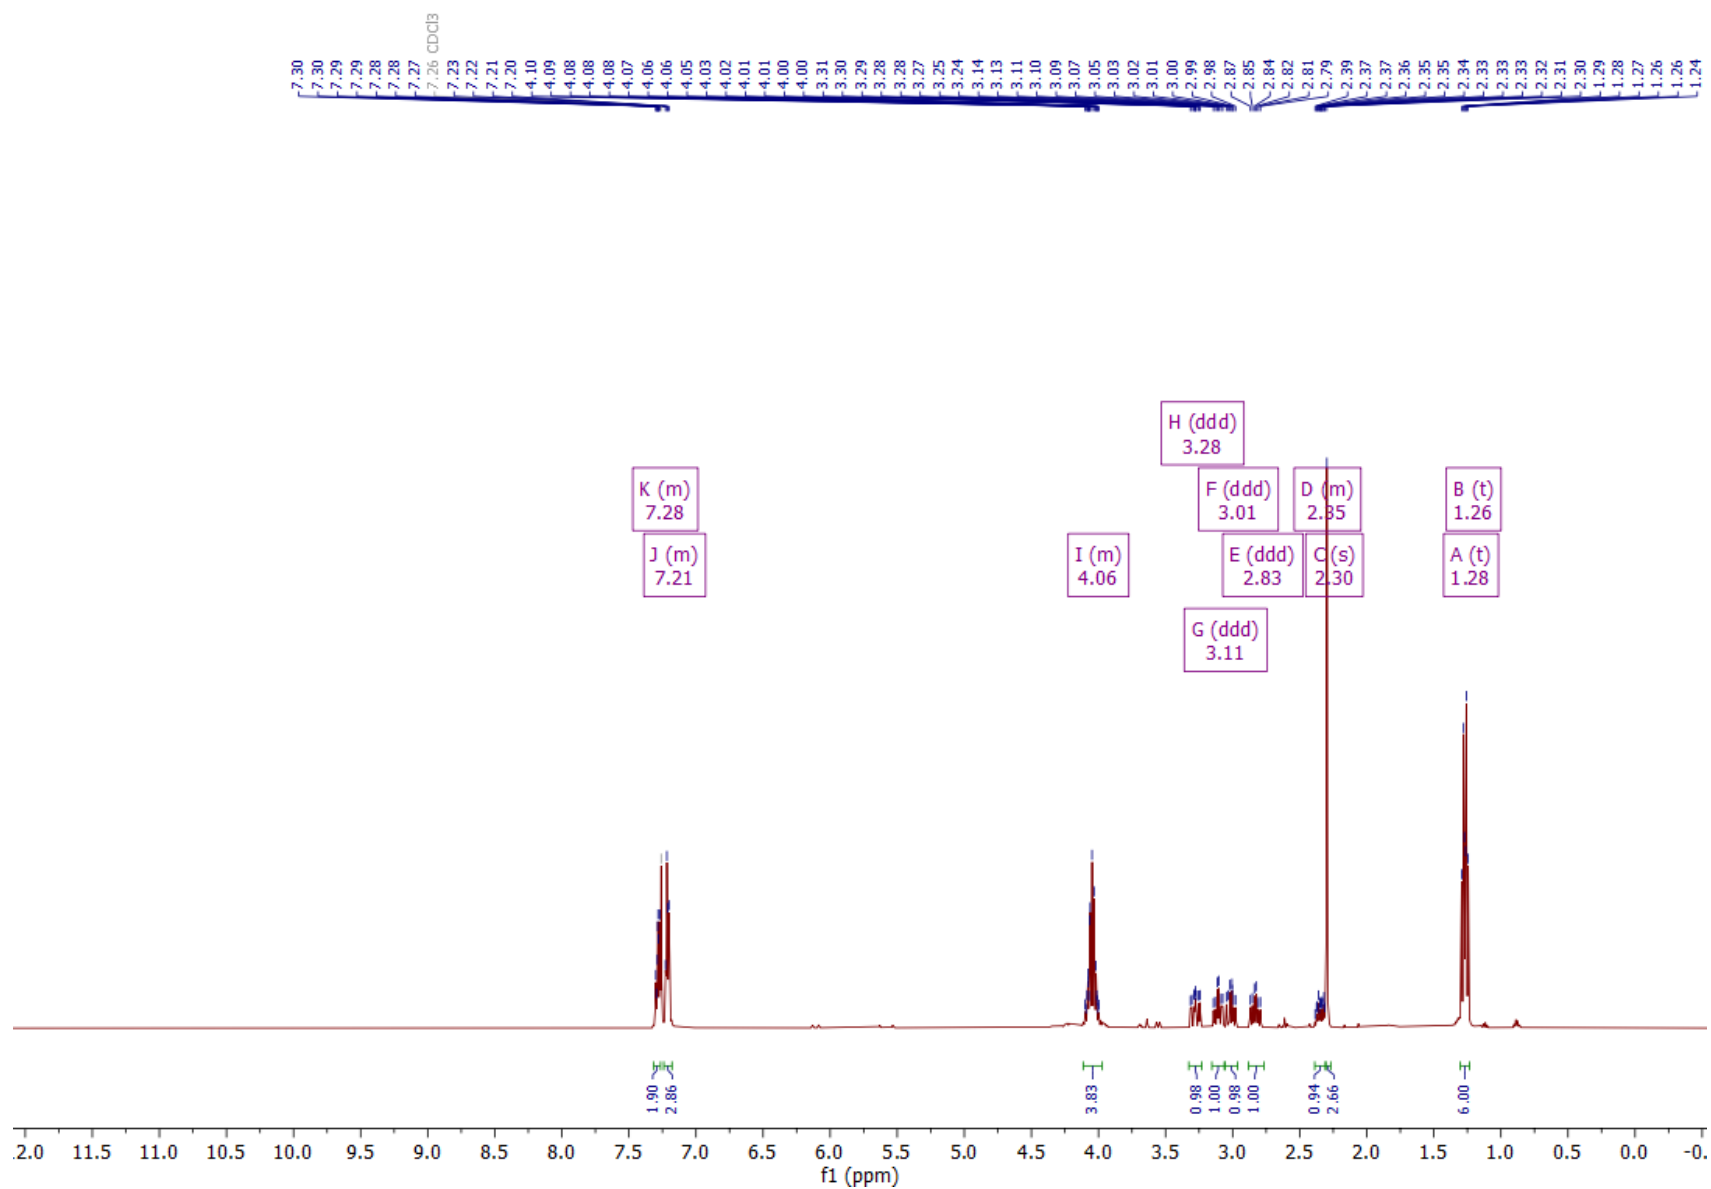

Figure S23. <sup>1</sup>H NMR spectrum of **9**.

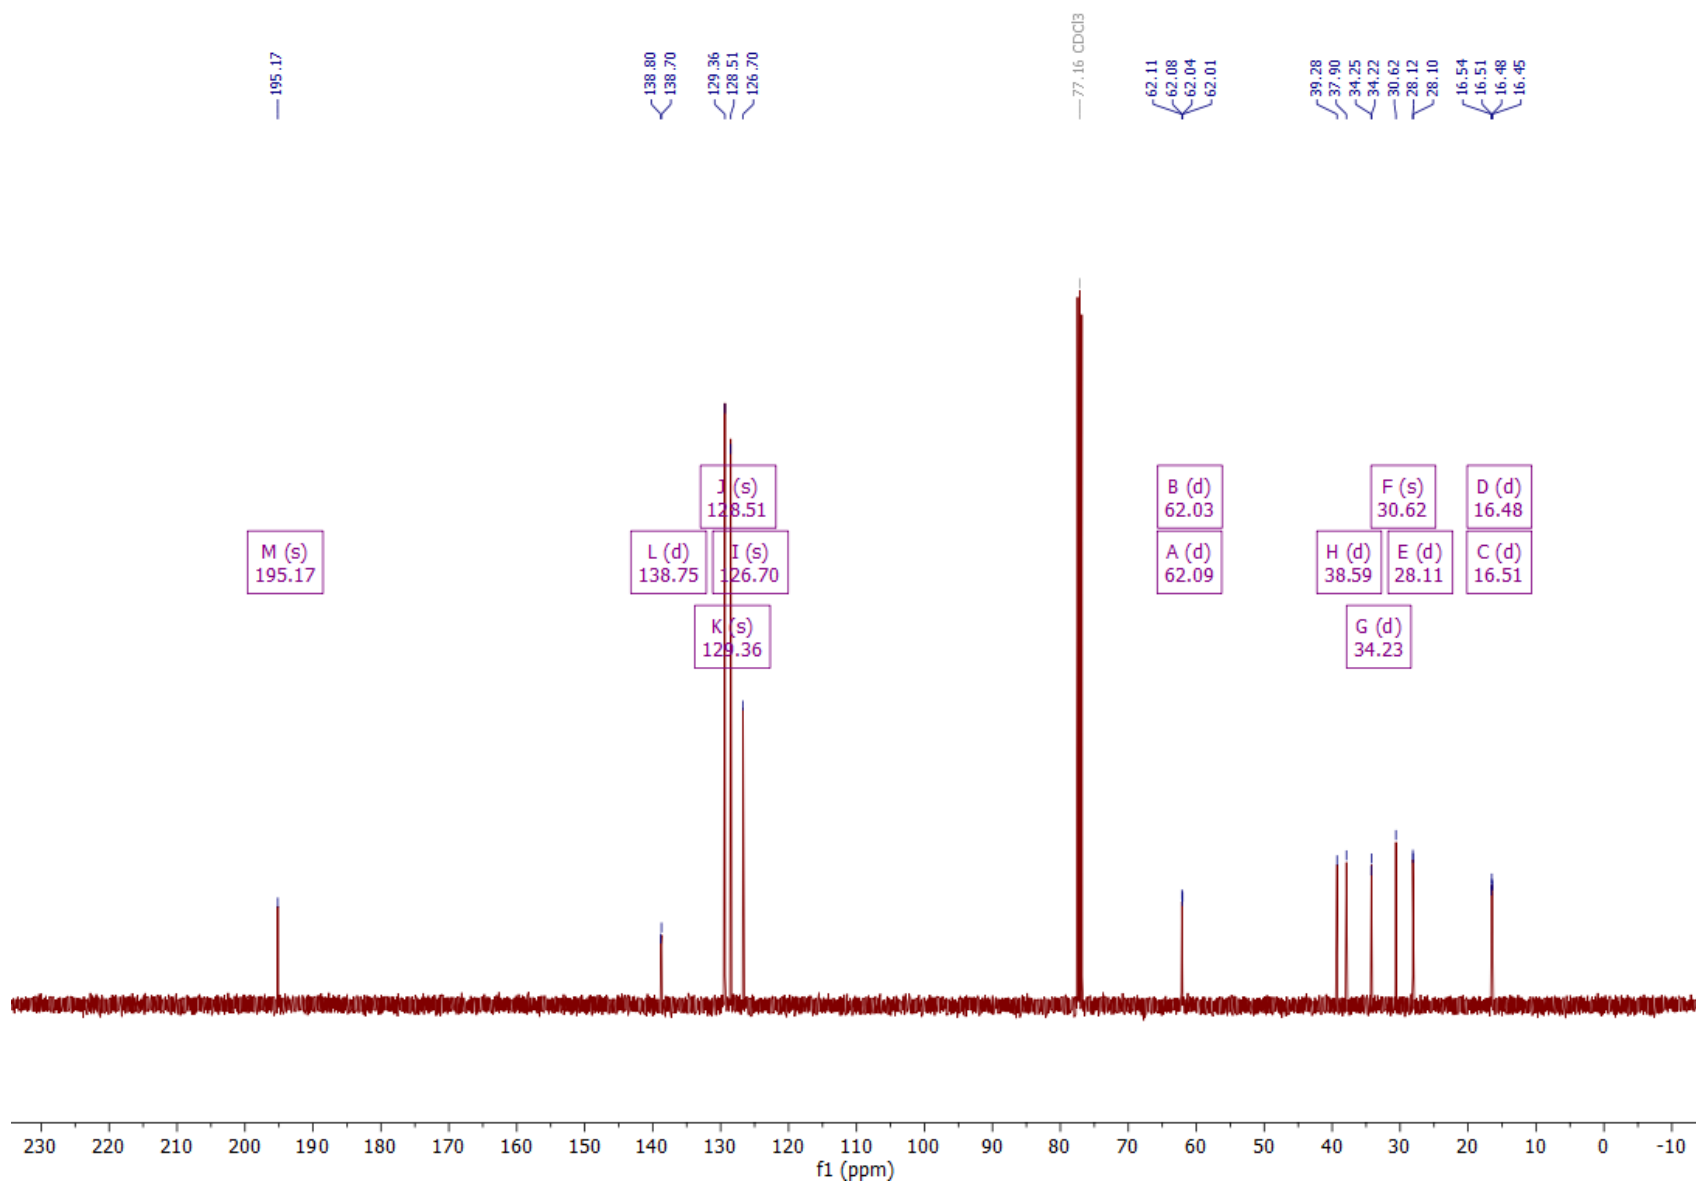

Figure S24. <sup>13</sup>C NMR spectrum of **9**.



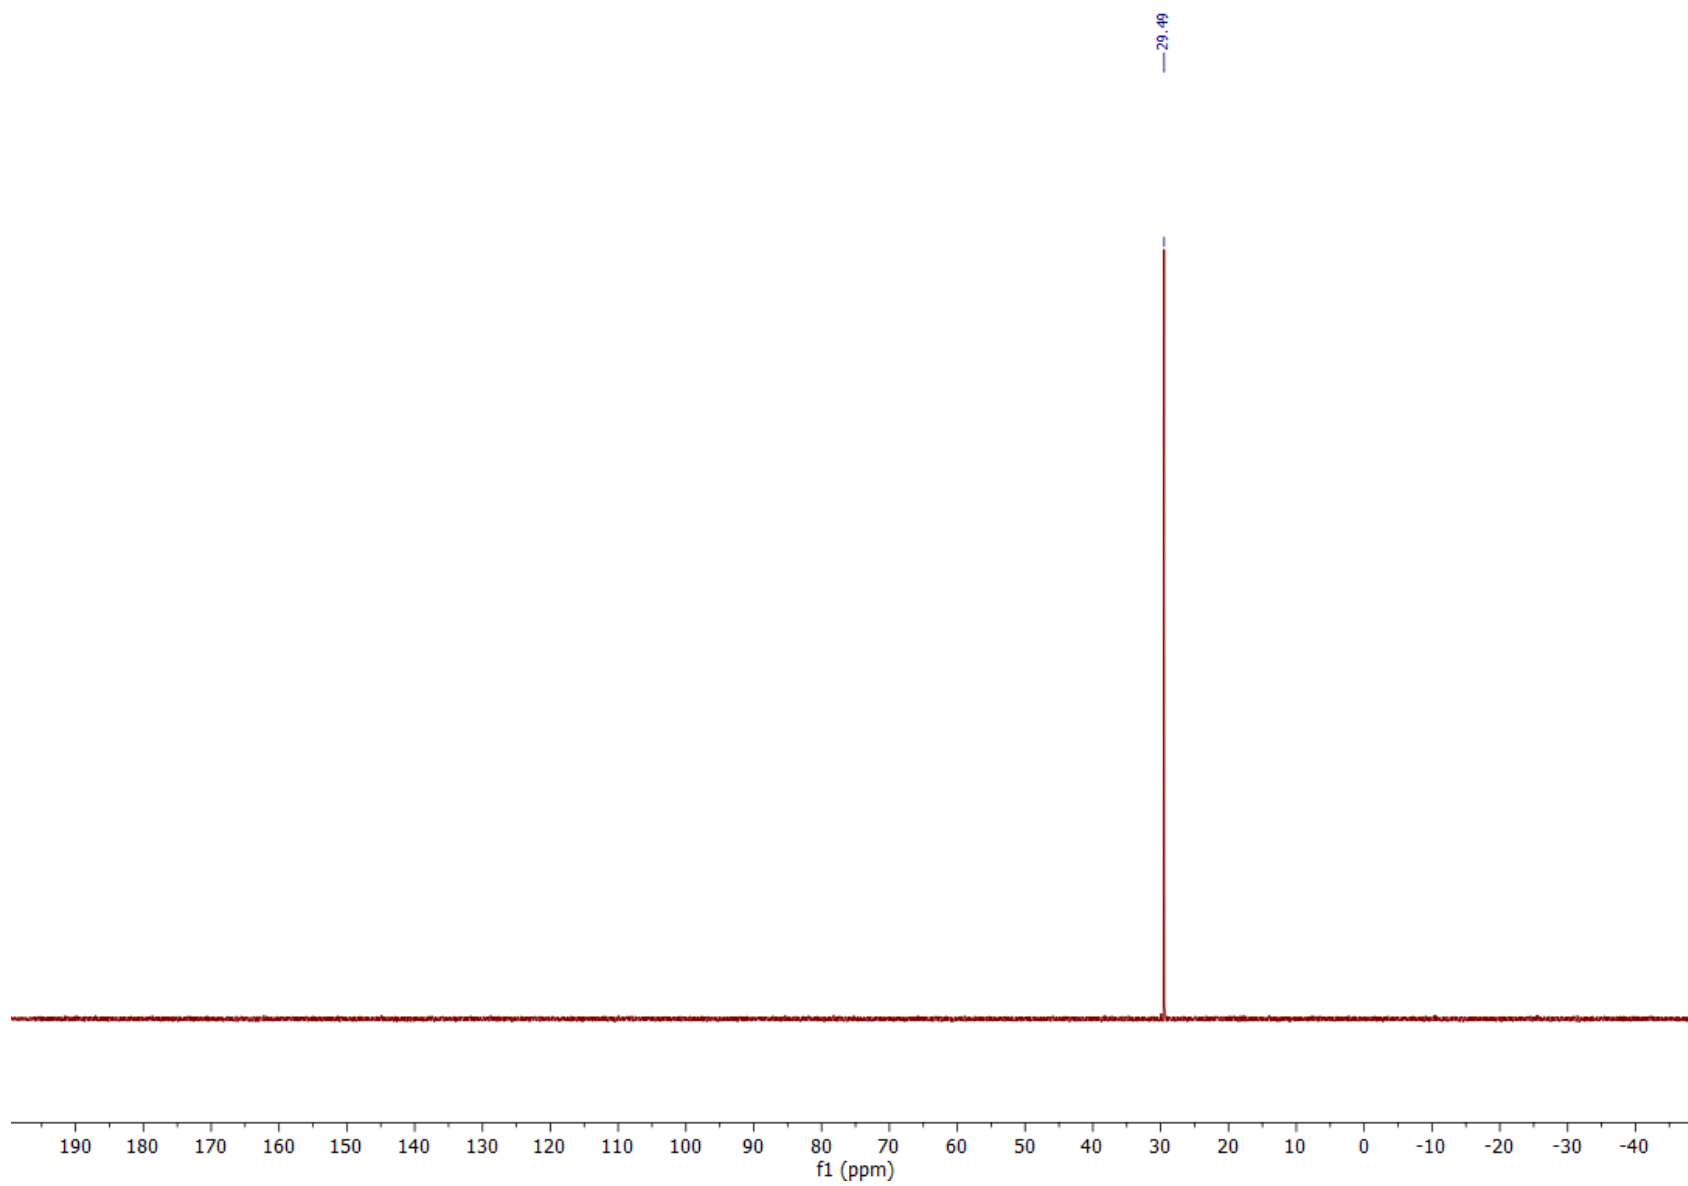

**Figure S25.**  $^{31}\text{P}$  NMR spectrum of **9**.

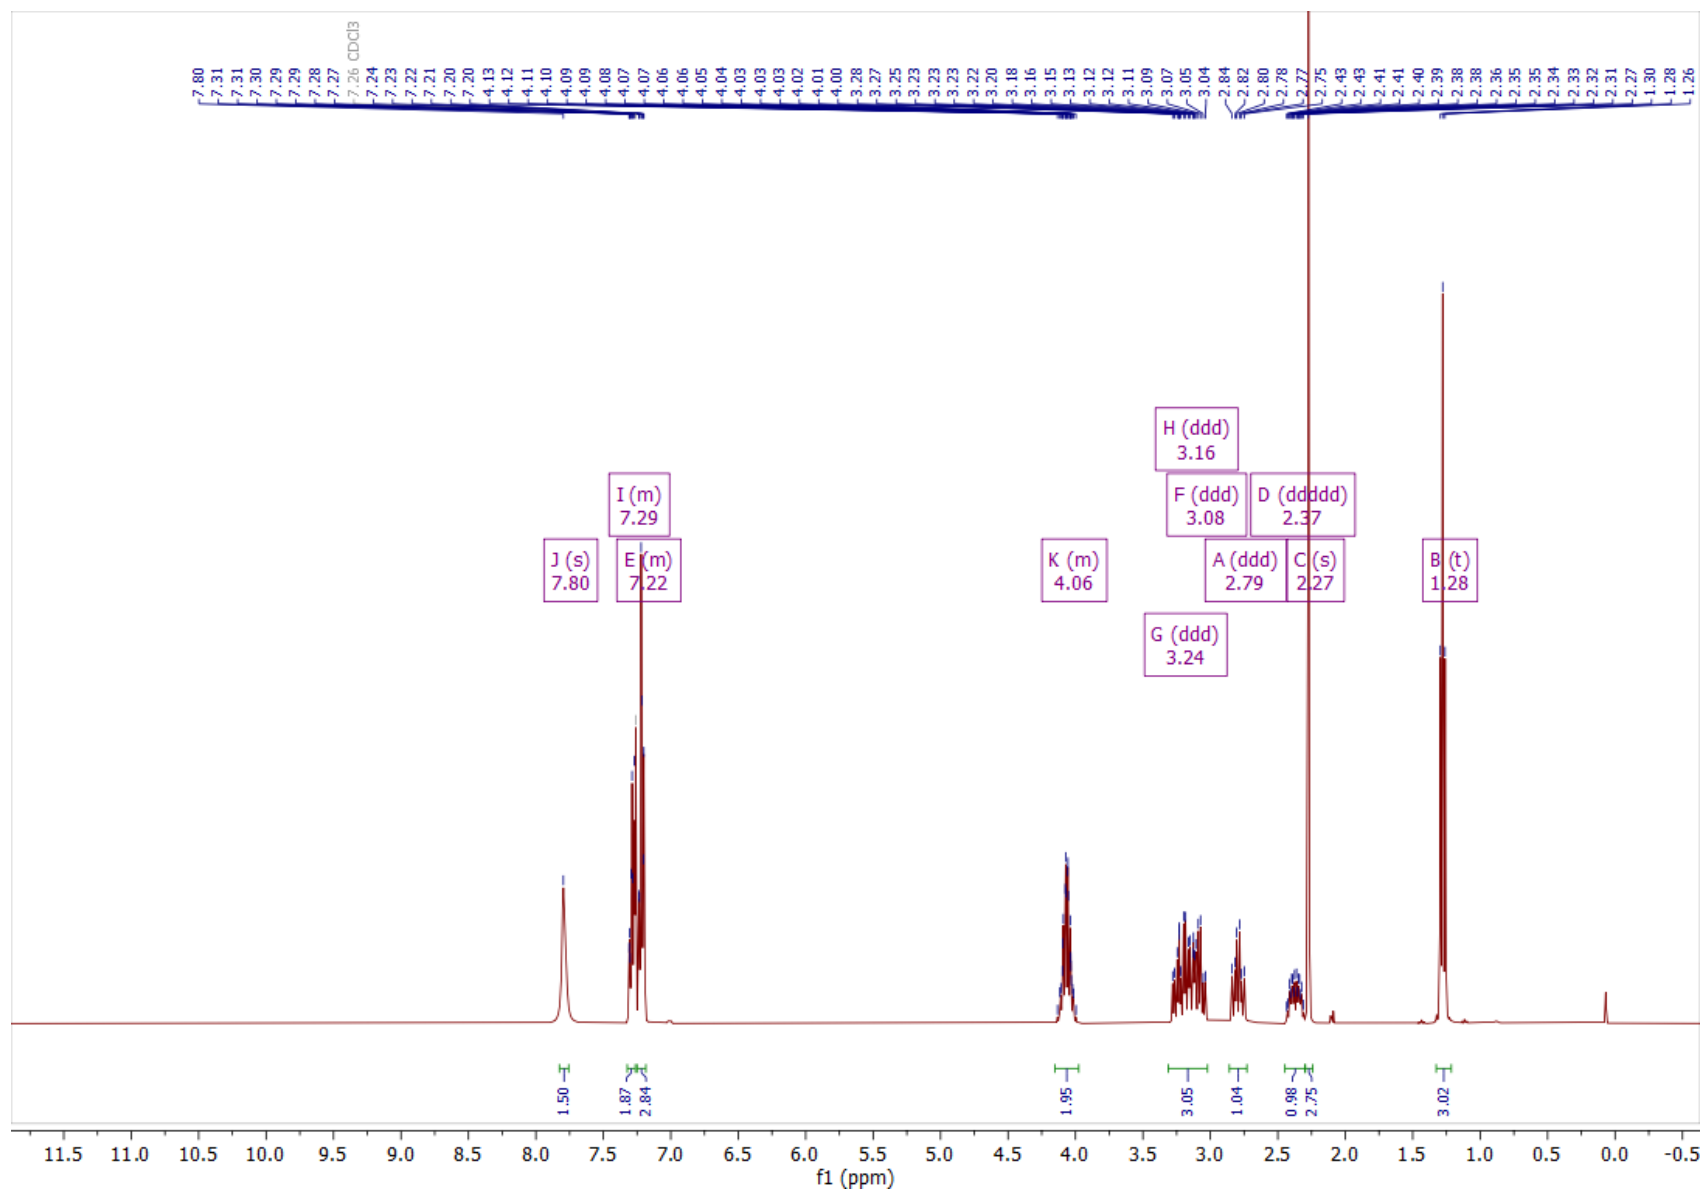

Figure S26. <sup>1</sup>H NMR spectrum of **10**.

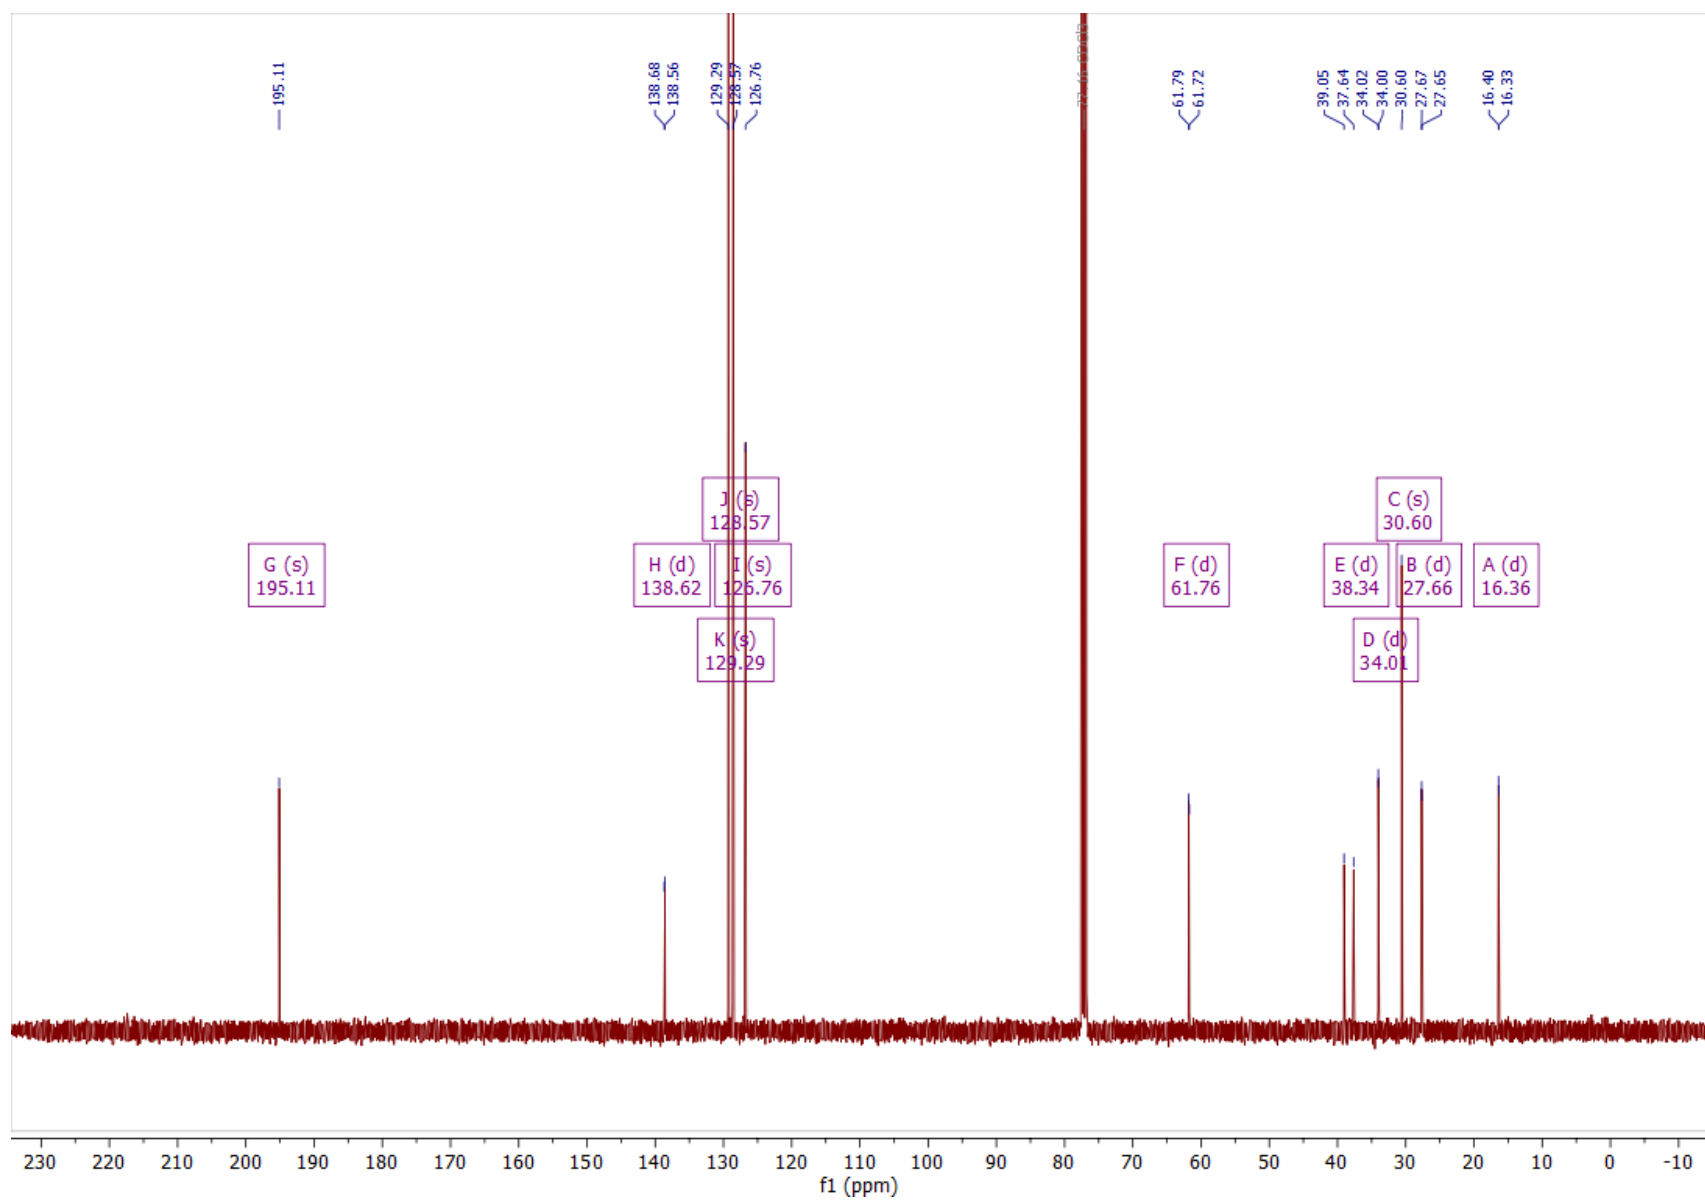

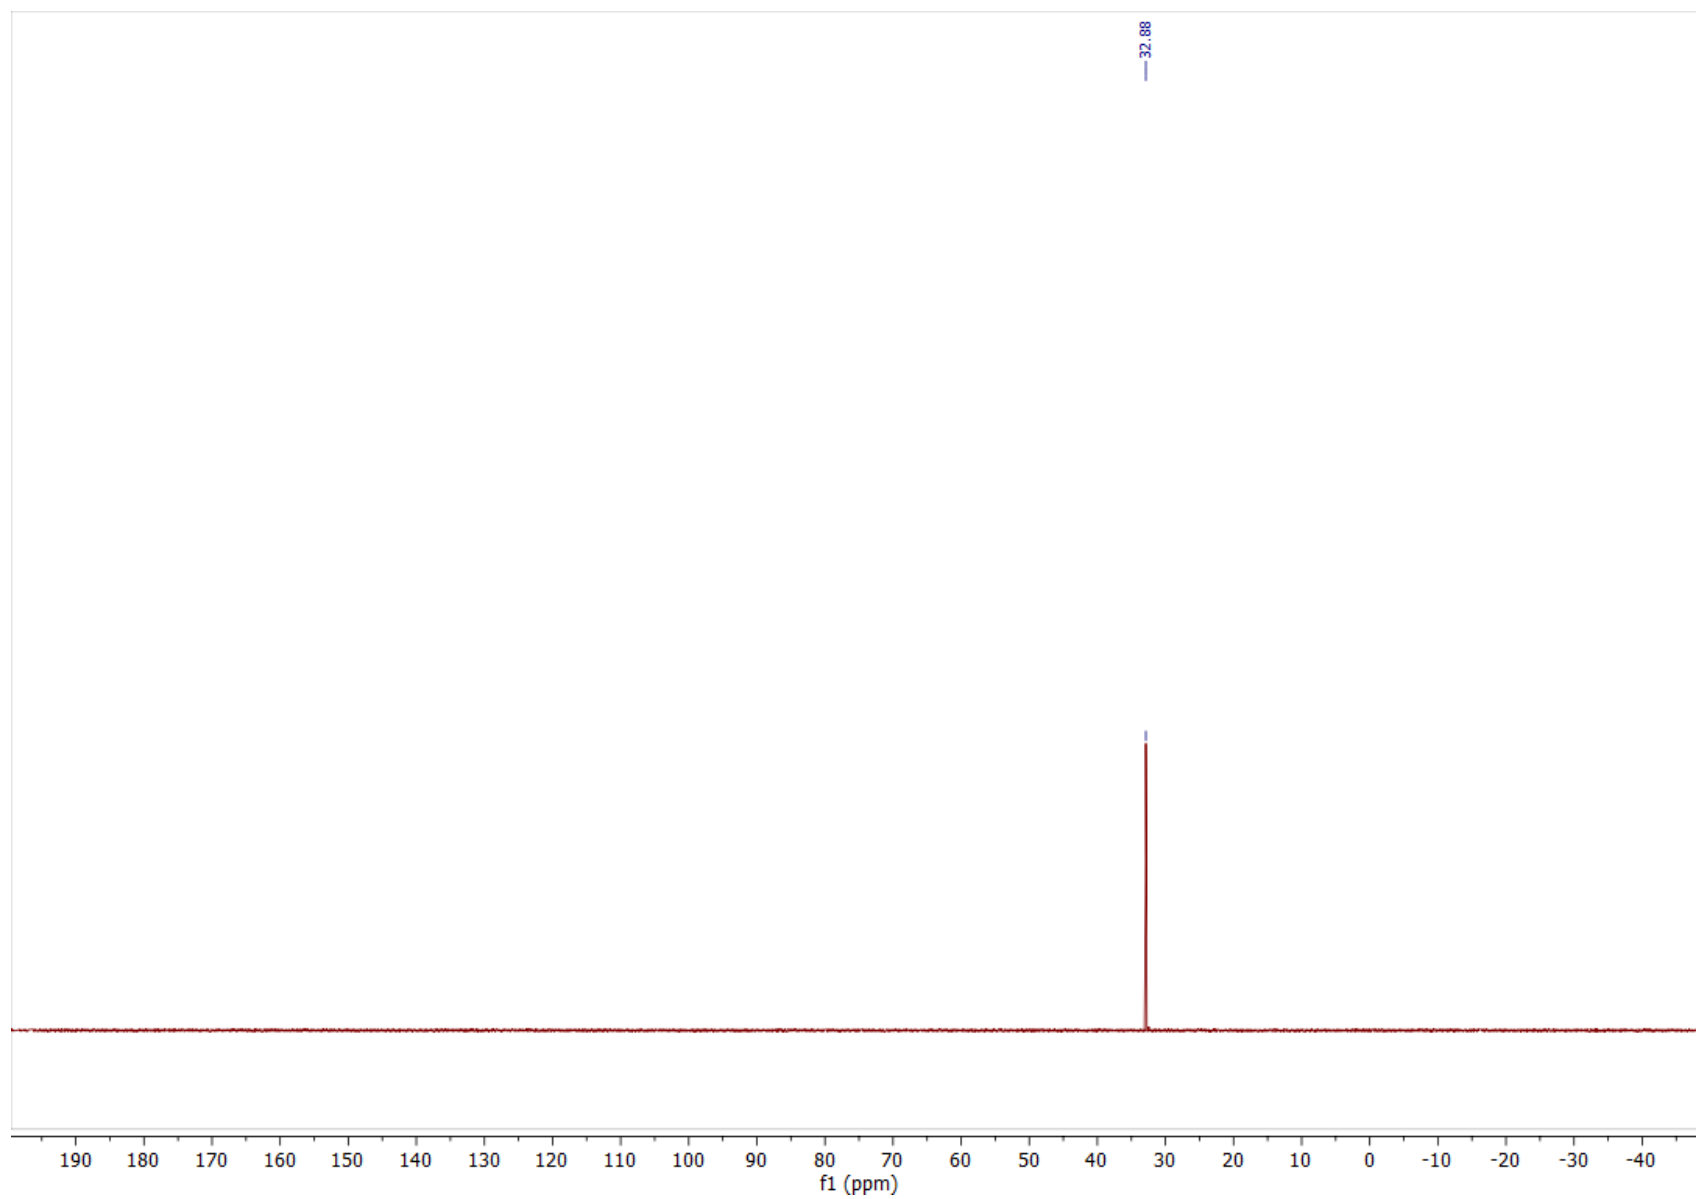

**Figure S28.**  $^{31}\text{P}$  NMR spectrum of **10**.

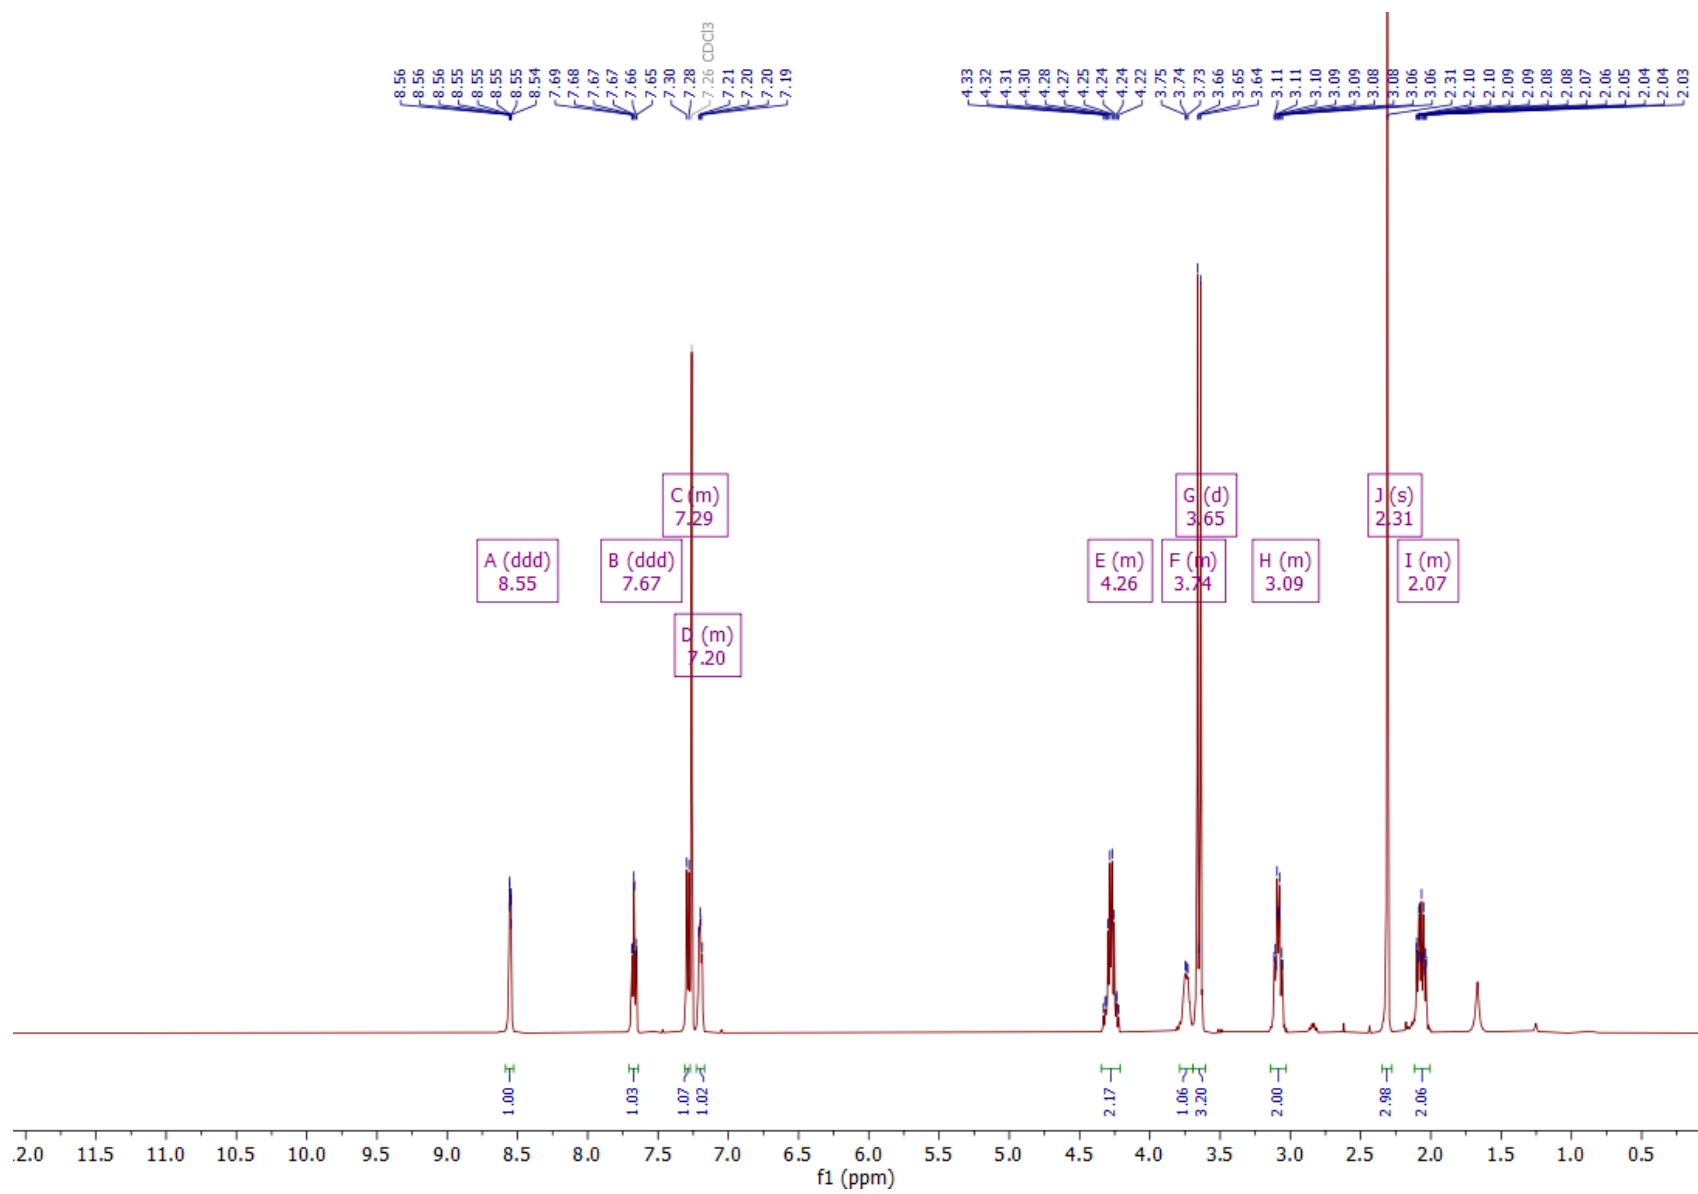

**Figure S29.** <sup>1</sup>H NMR spectrum of **1a**.

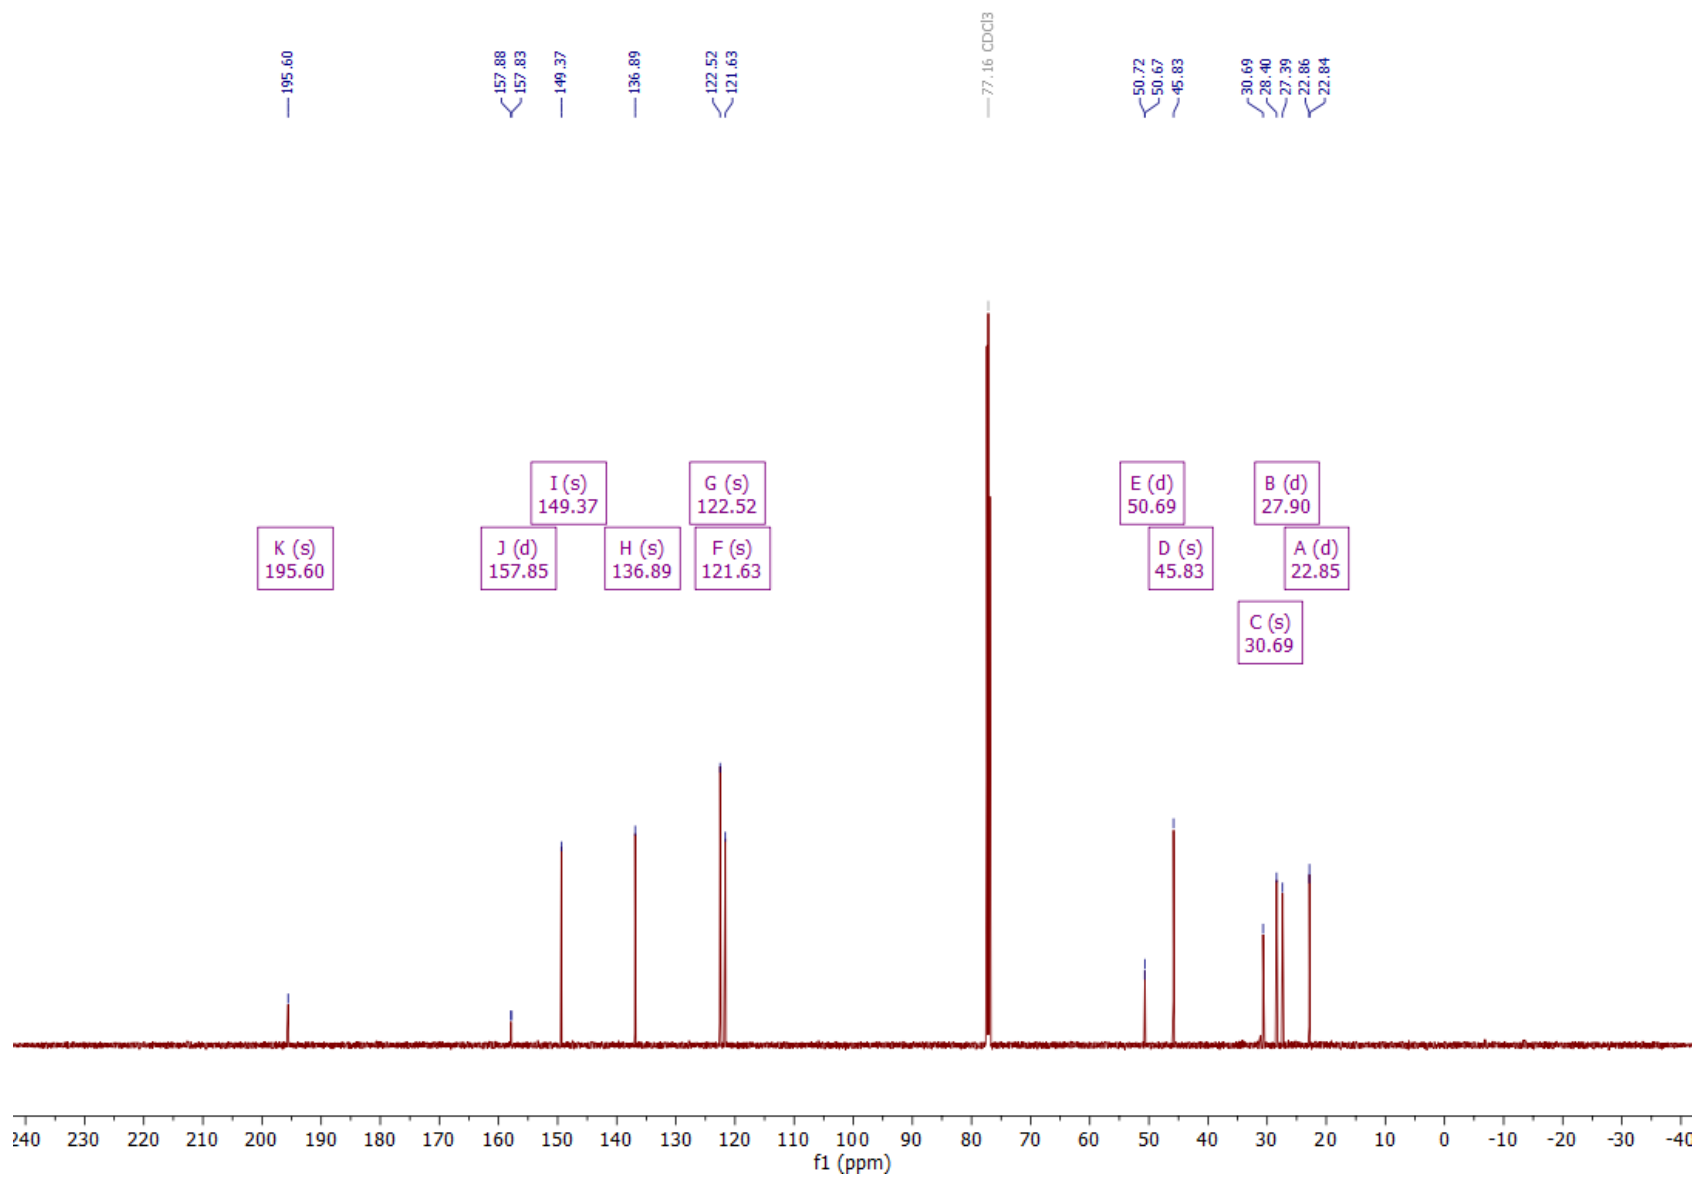

Figure S30.  $^{13}\text{C}$  NMR spectrum of 1a.

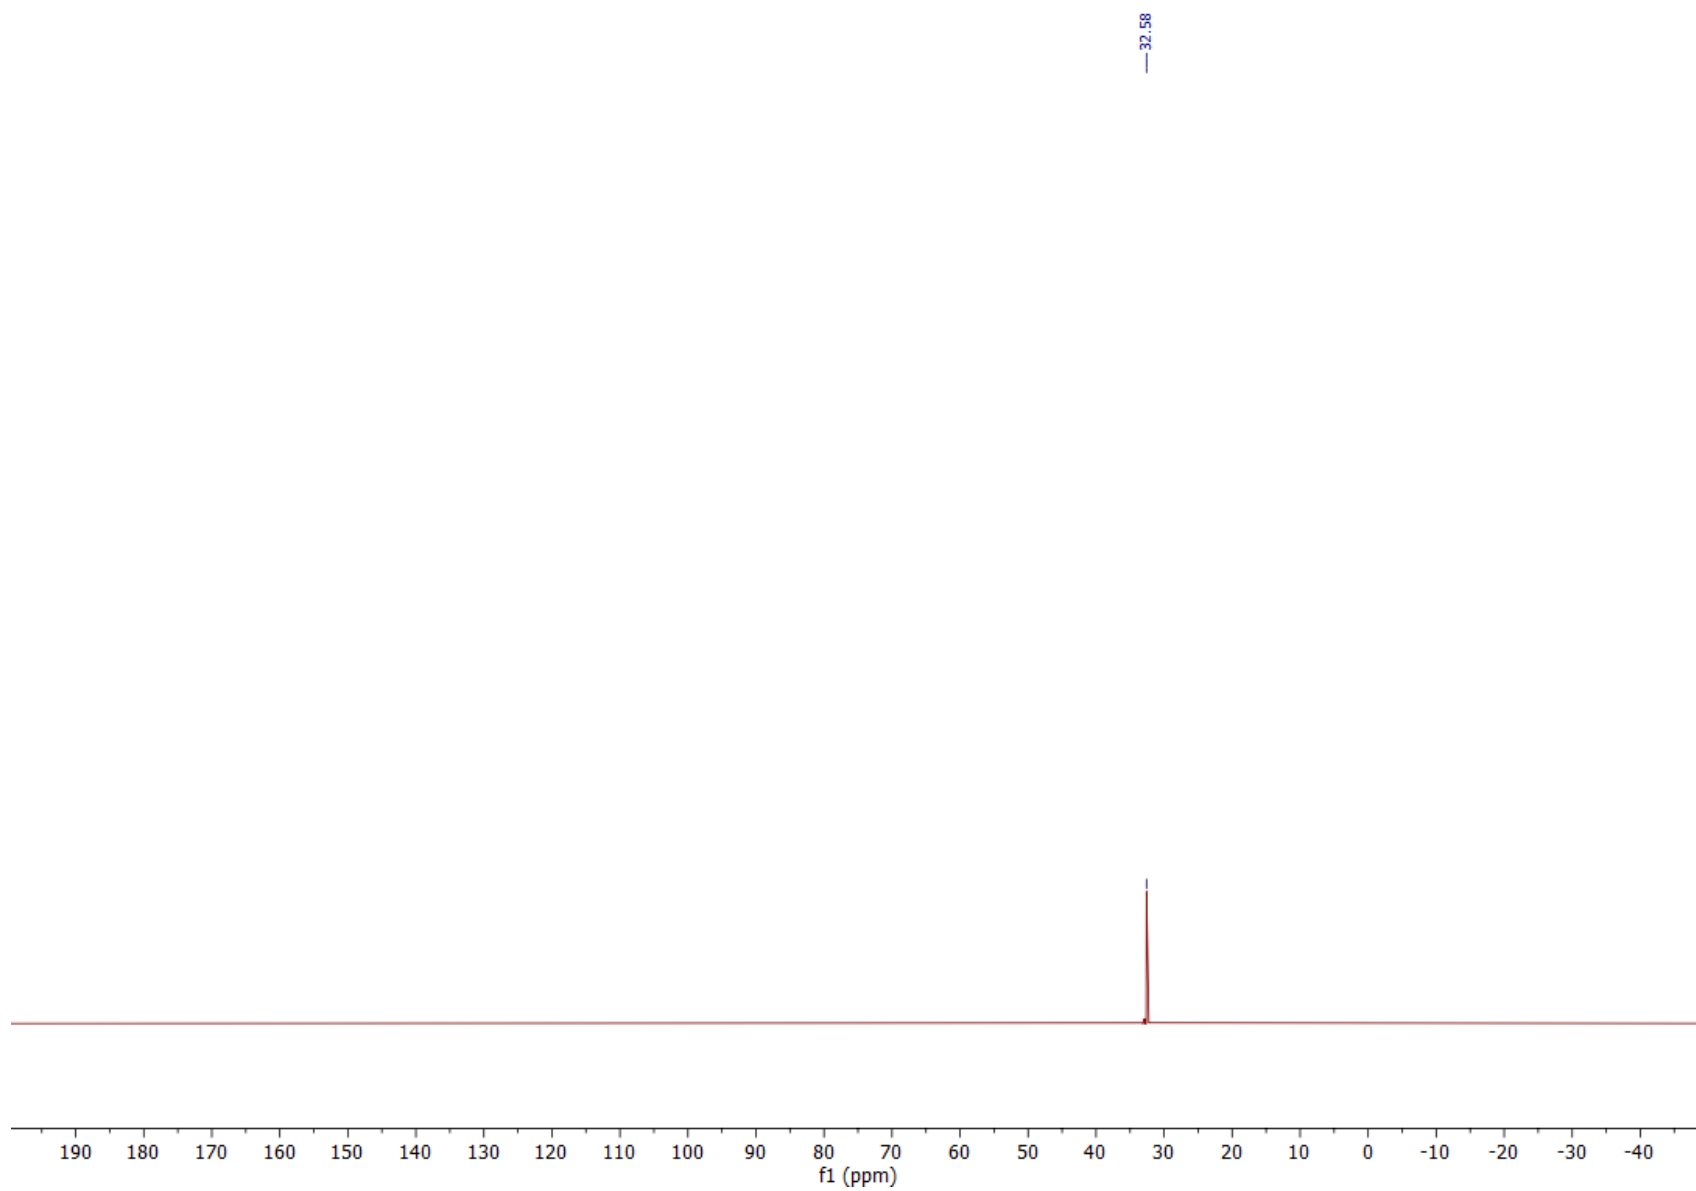

**Figure S31.**  $^{31}\text{P}$  NMR spectrum of **1a**.

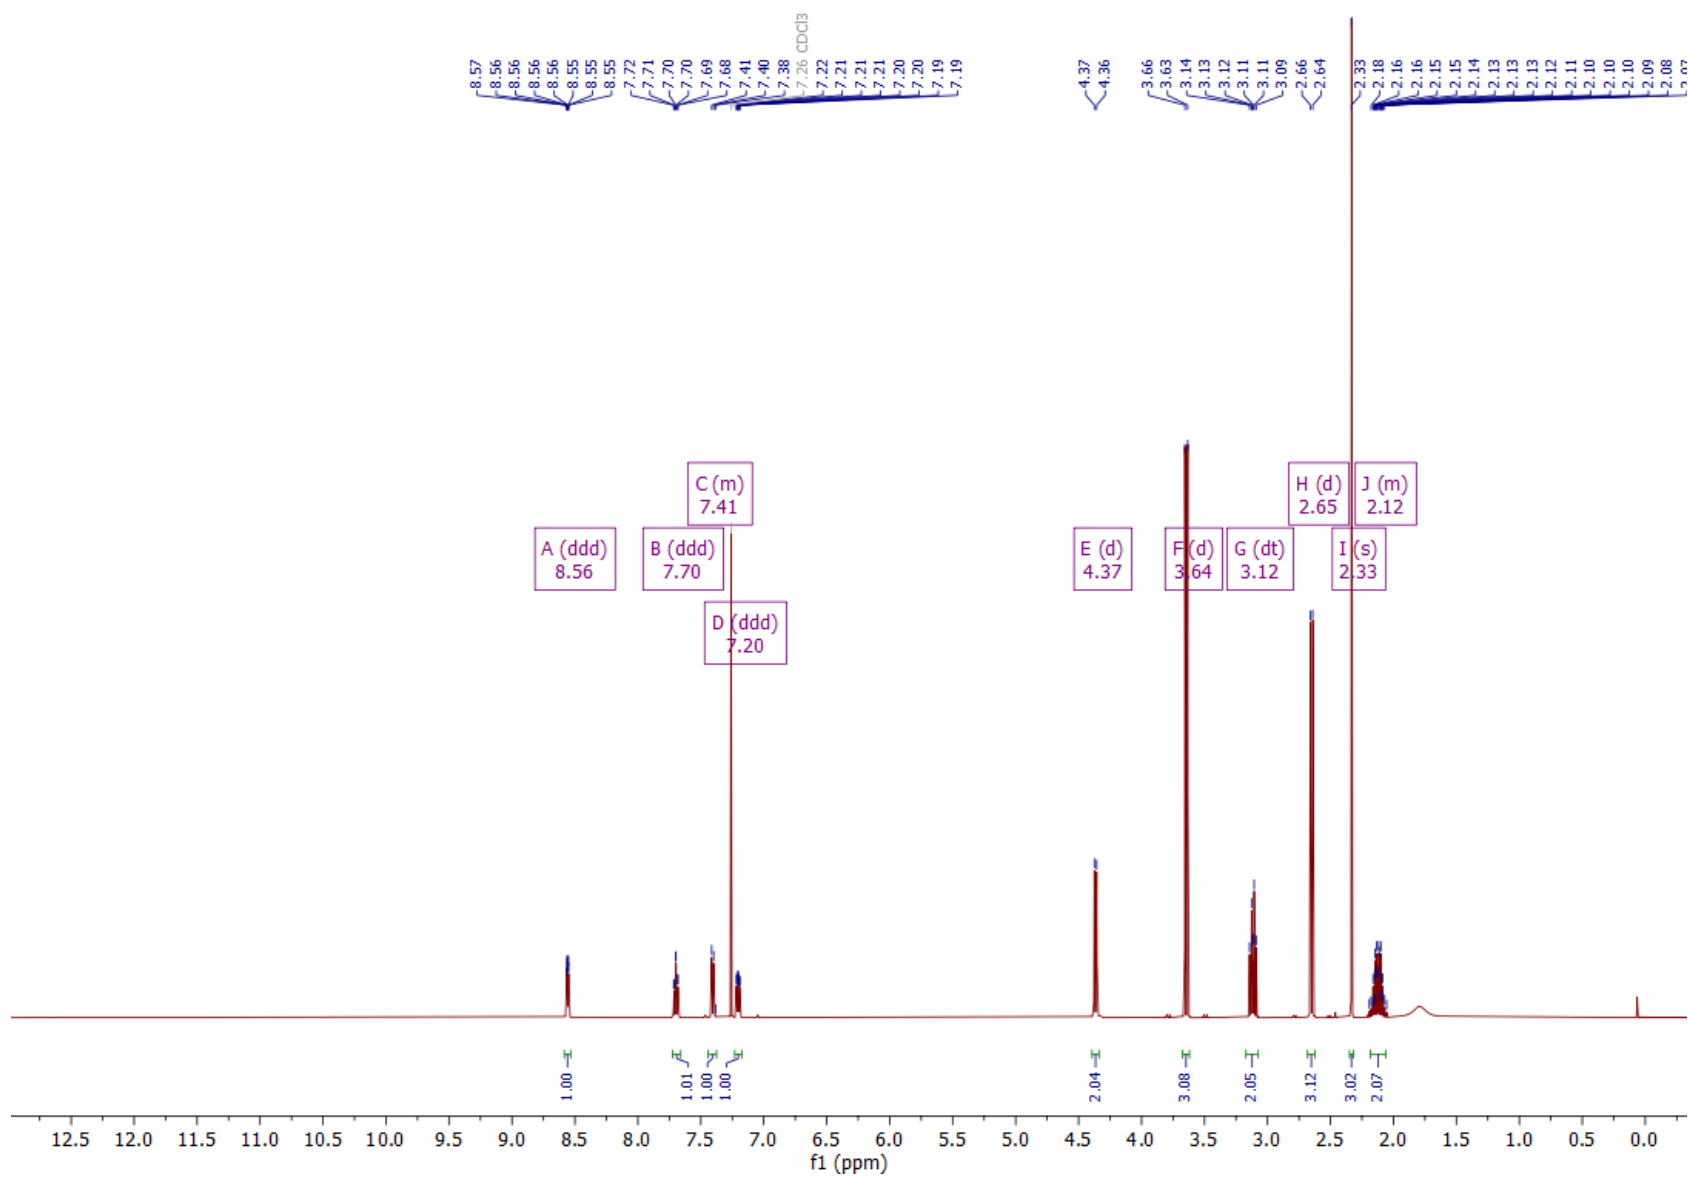

Figure S32. <sup>1</sup>H NMR spectrum of **1b**.



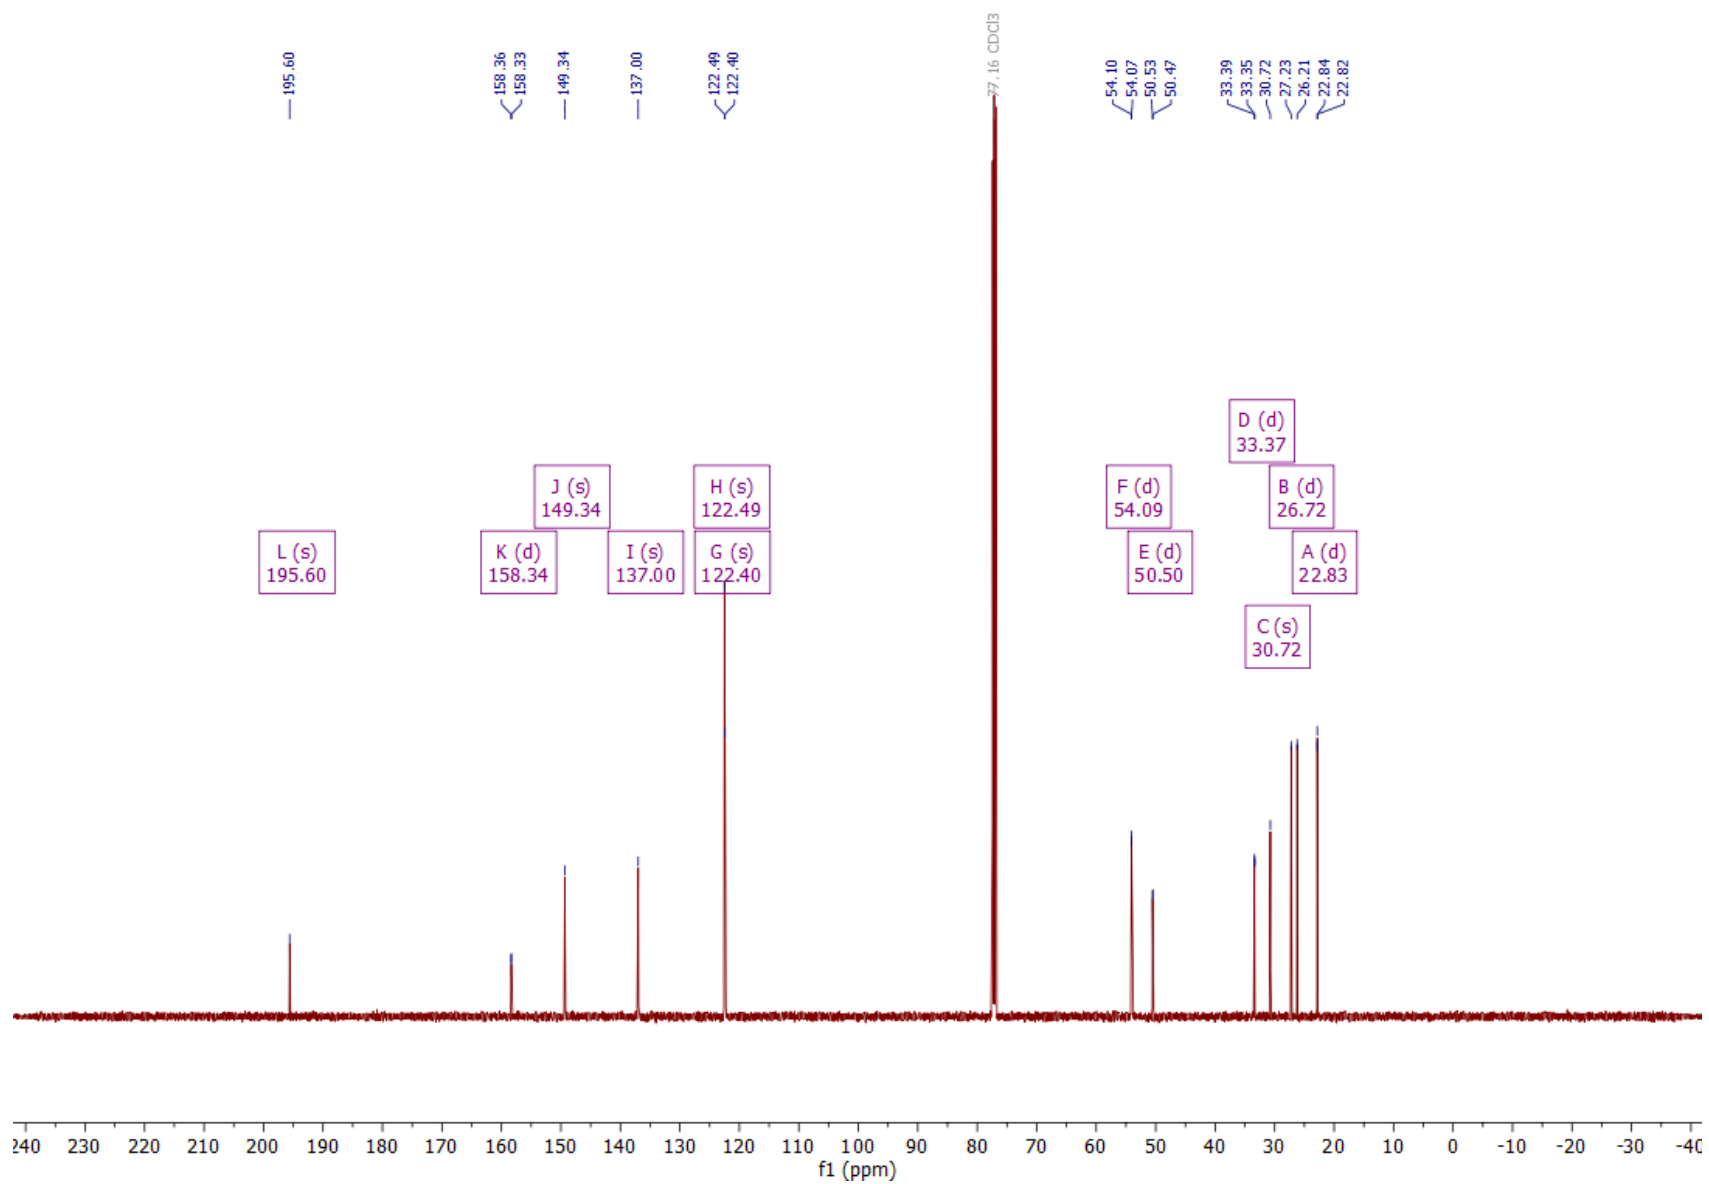

Figure S33. <sup>13</sup>C NMR spectrum of **1b**.

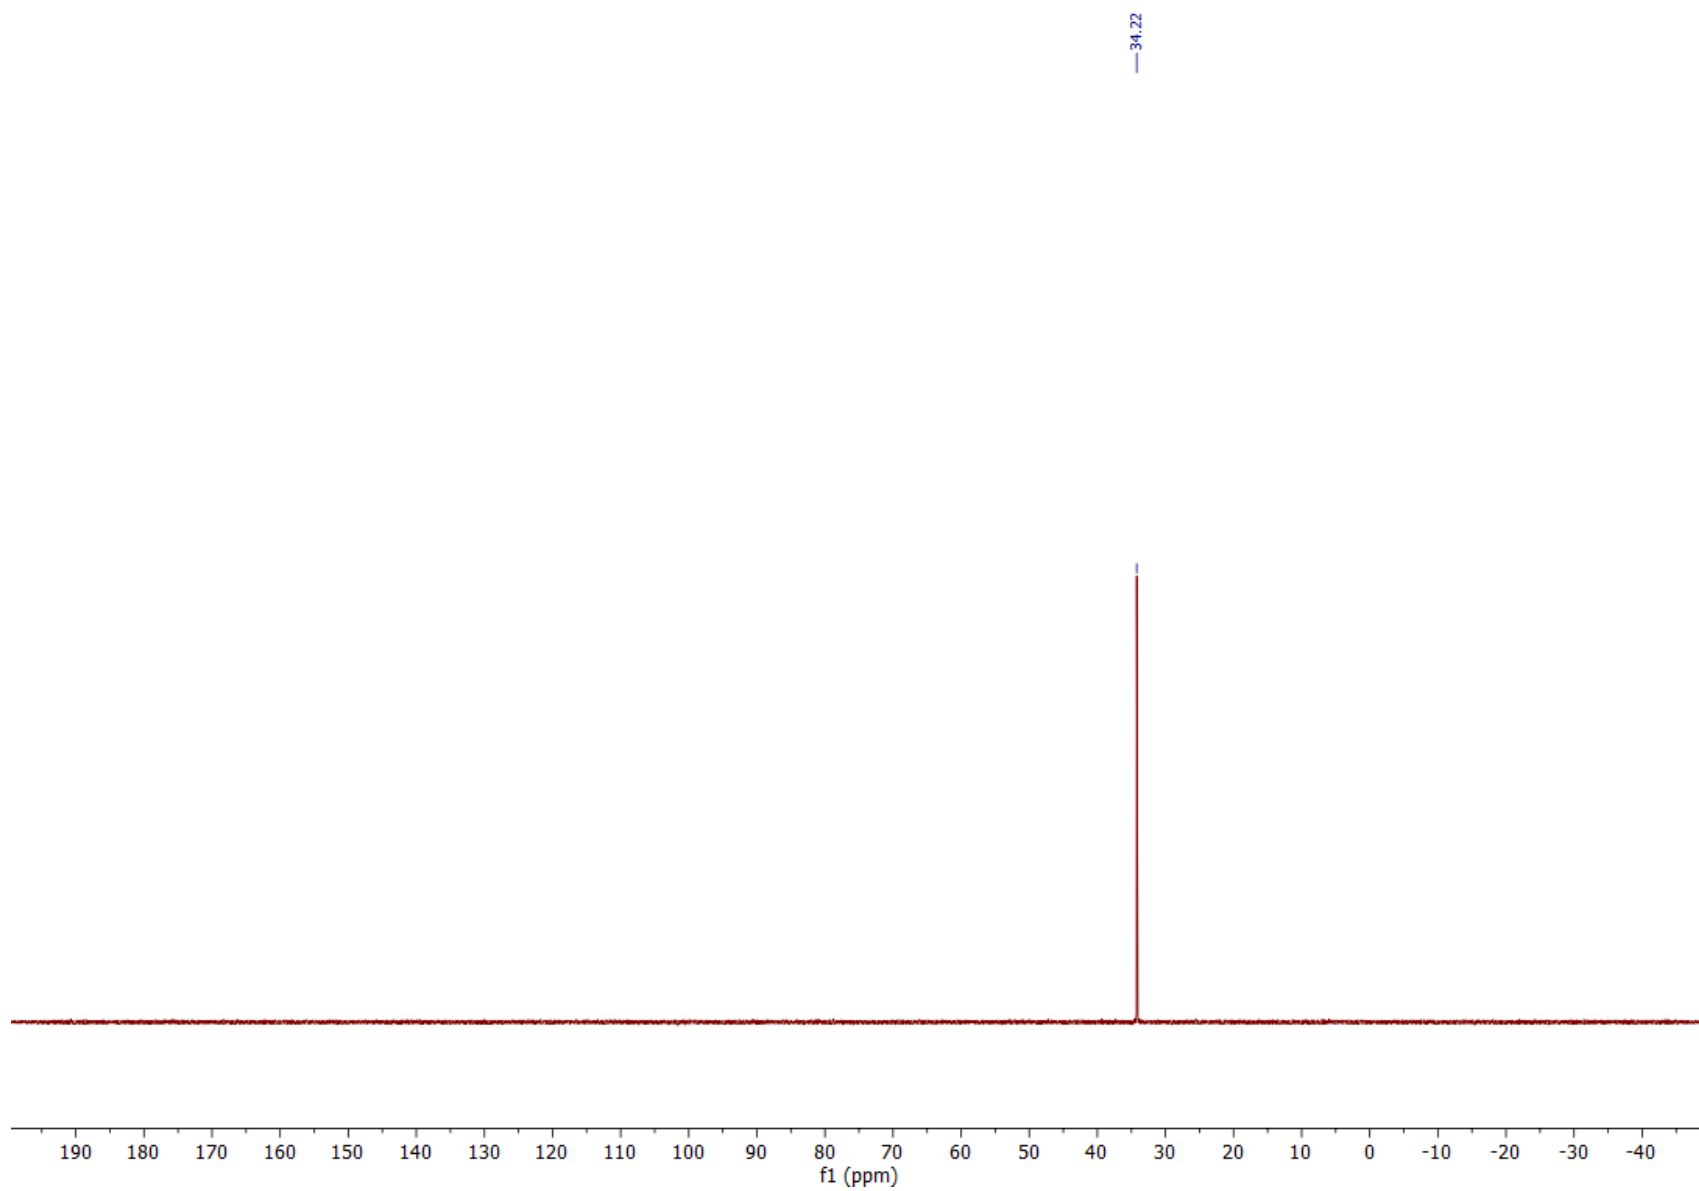

**Figure S34.**  $^{31}\text{P}$  NMR spectrum of **1b**.

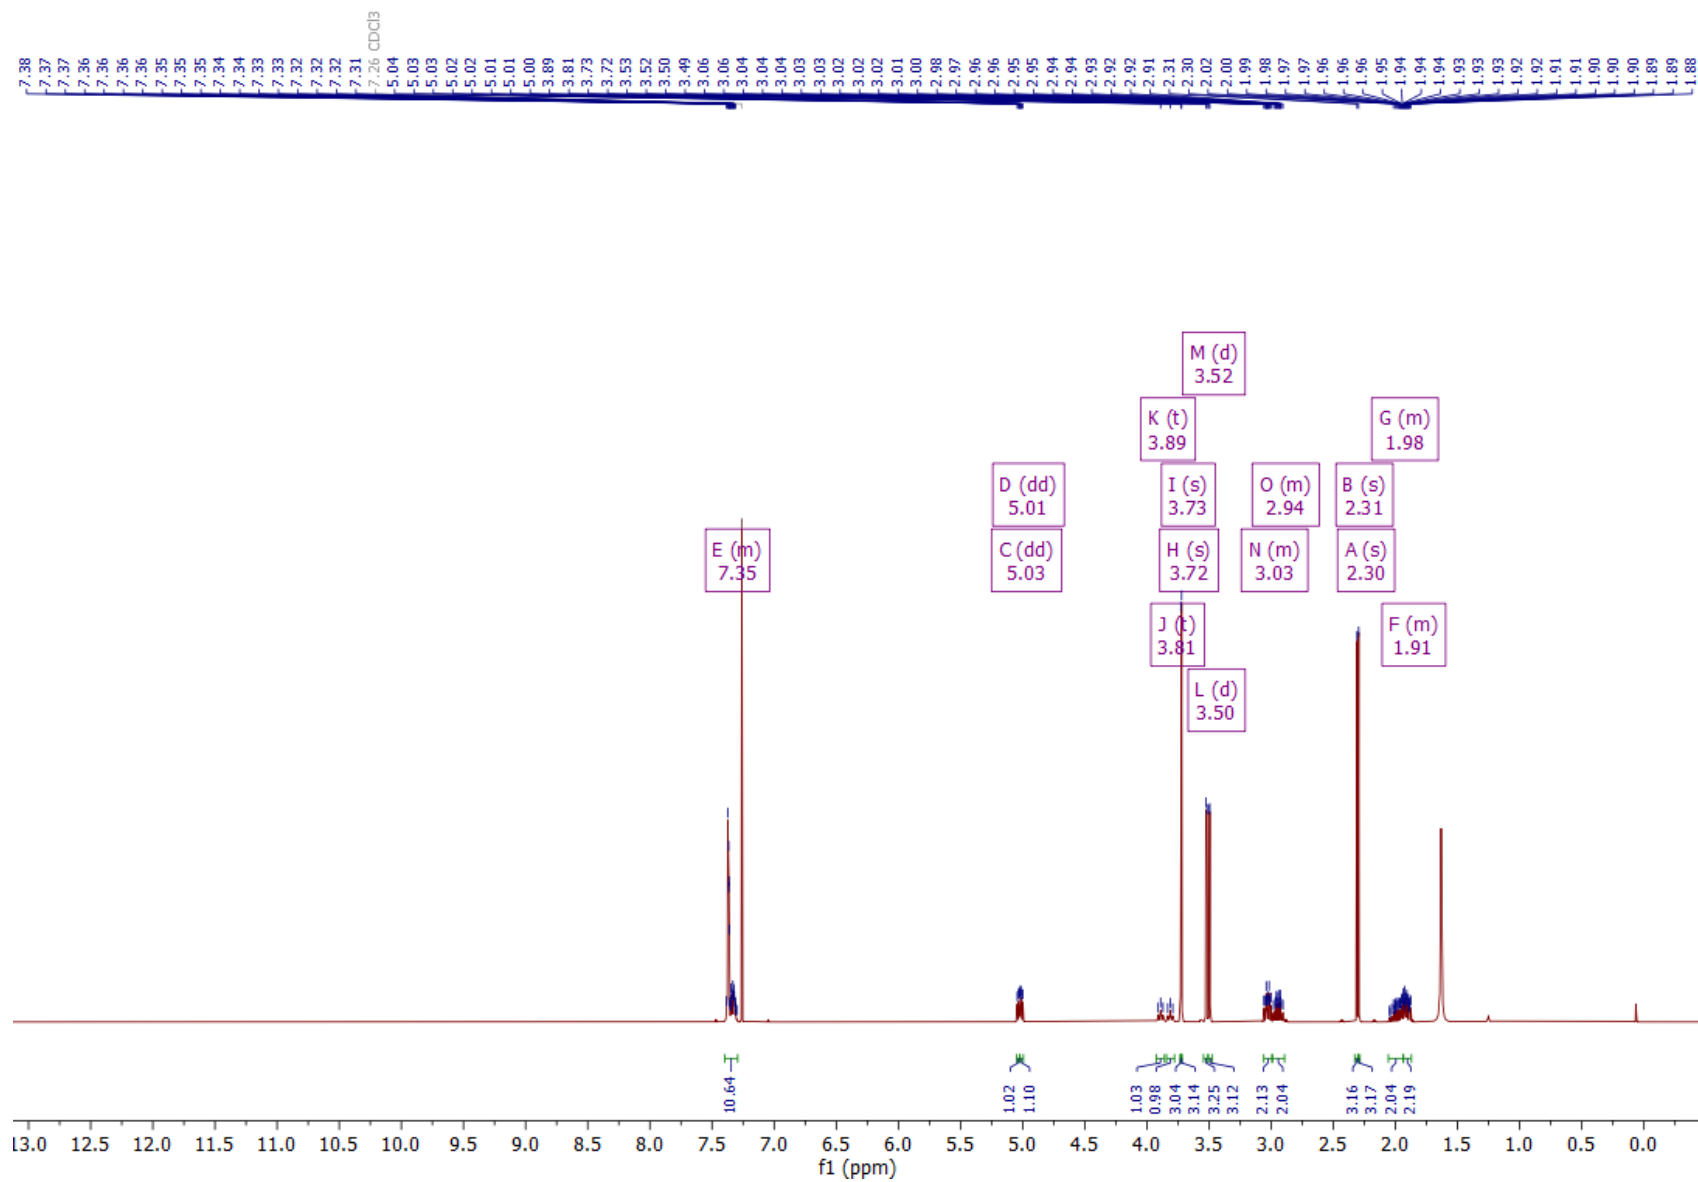

Figure S35. <sup>1</sup>H NMR spectrum of 1c.

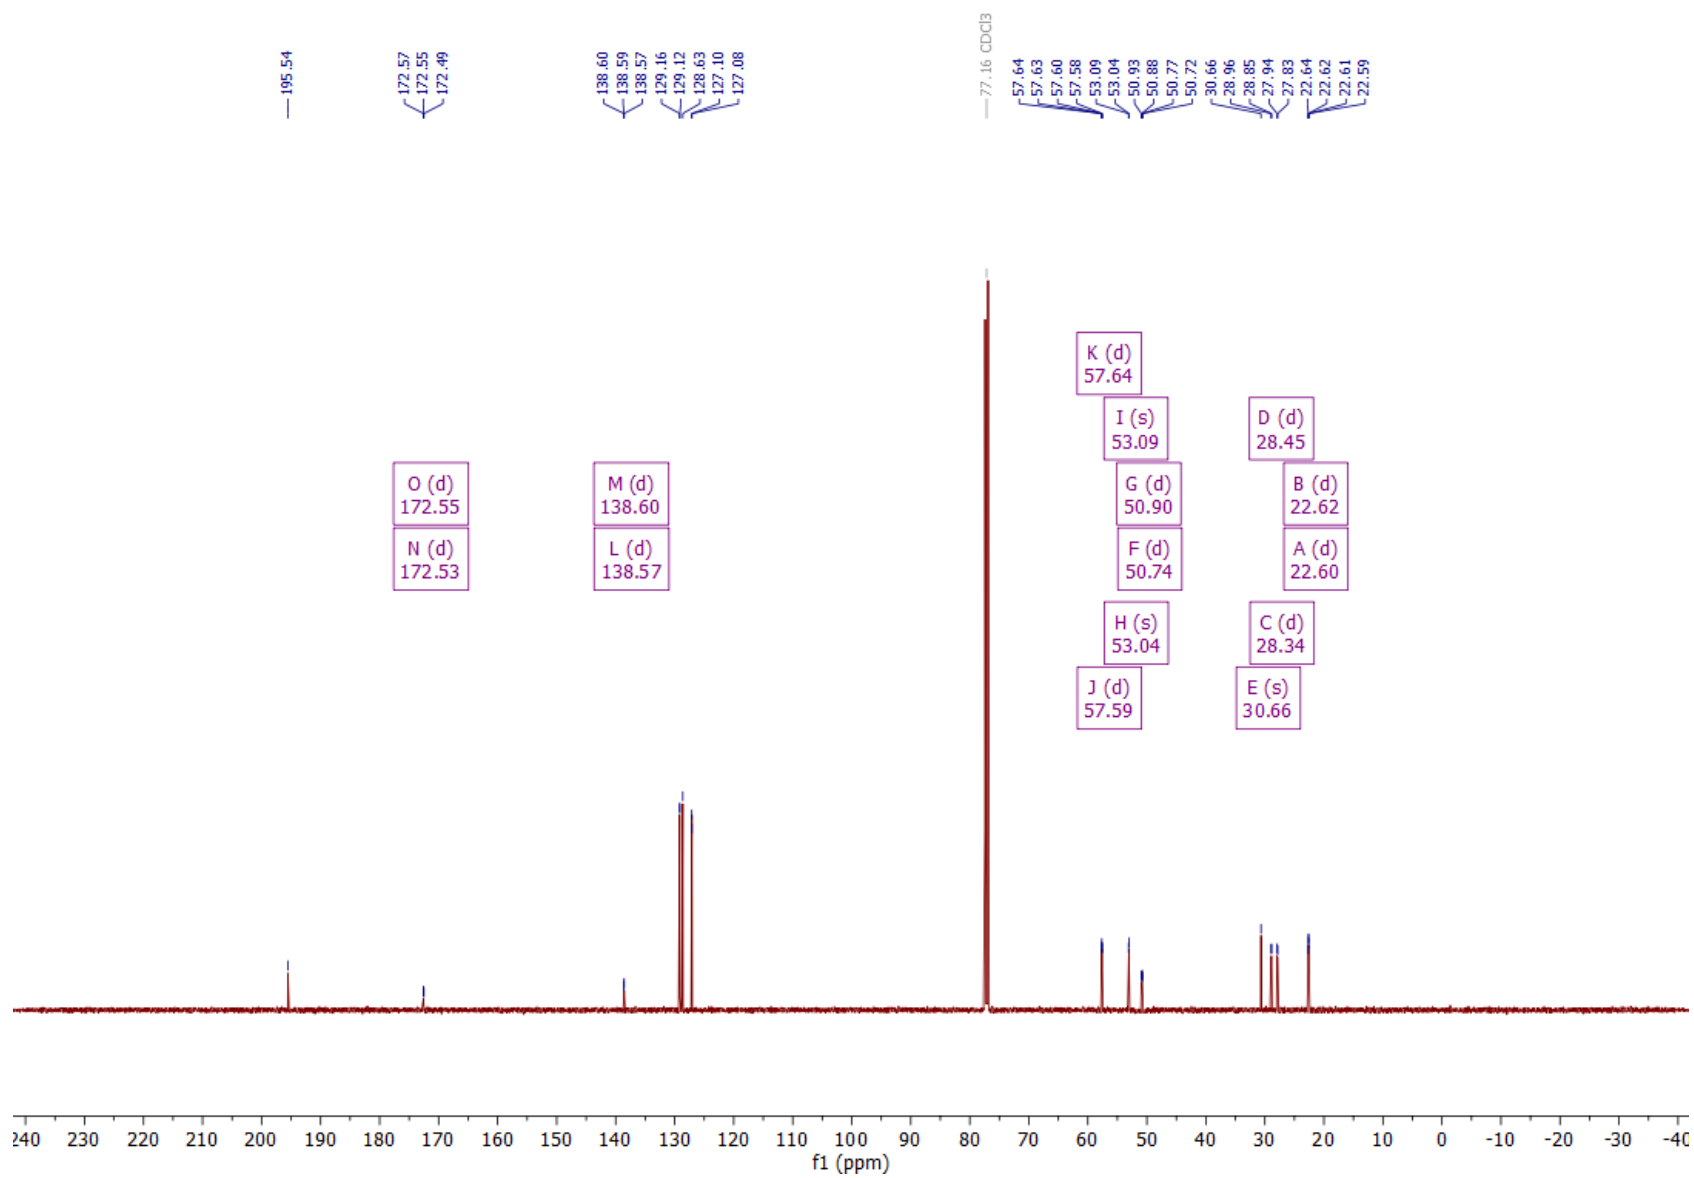

Figure S36. <sup>13</sup>C NMR spectrum of **1c**.

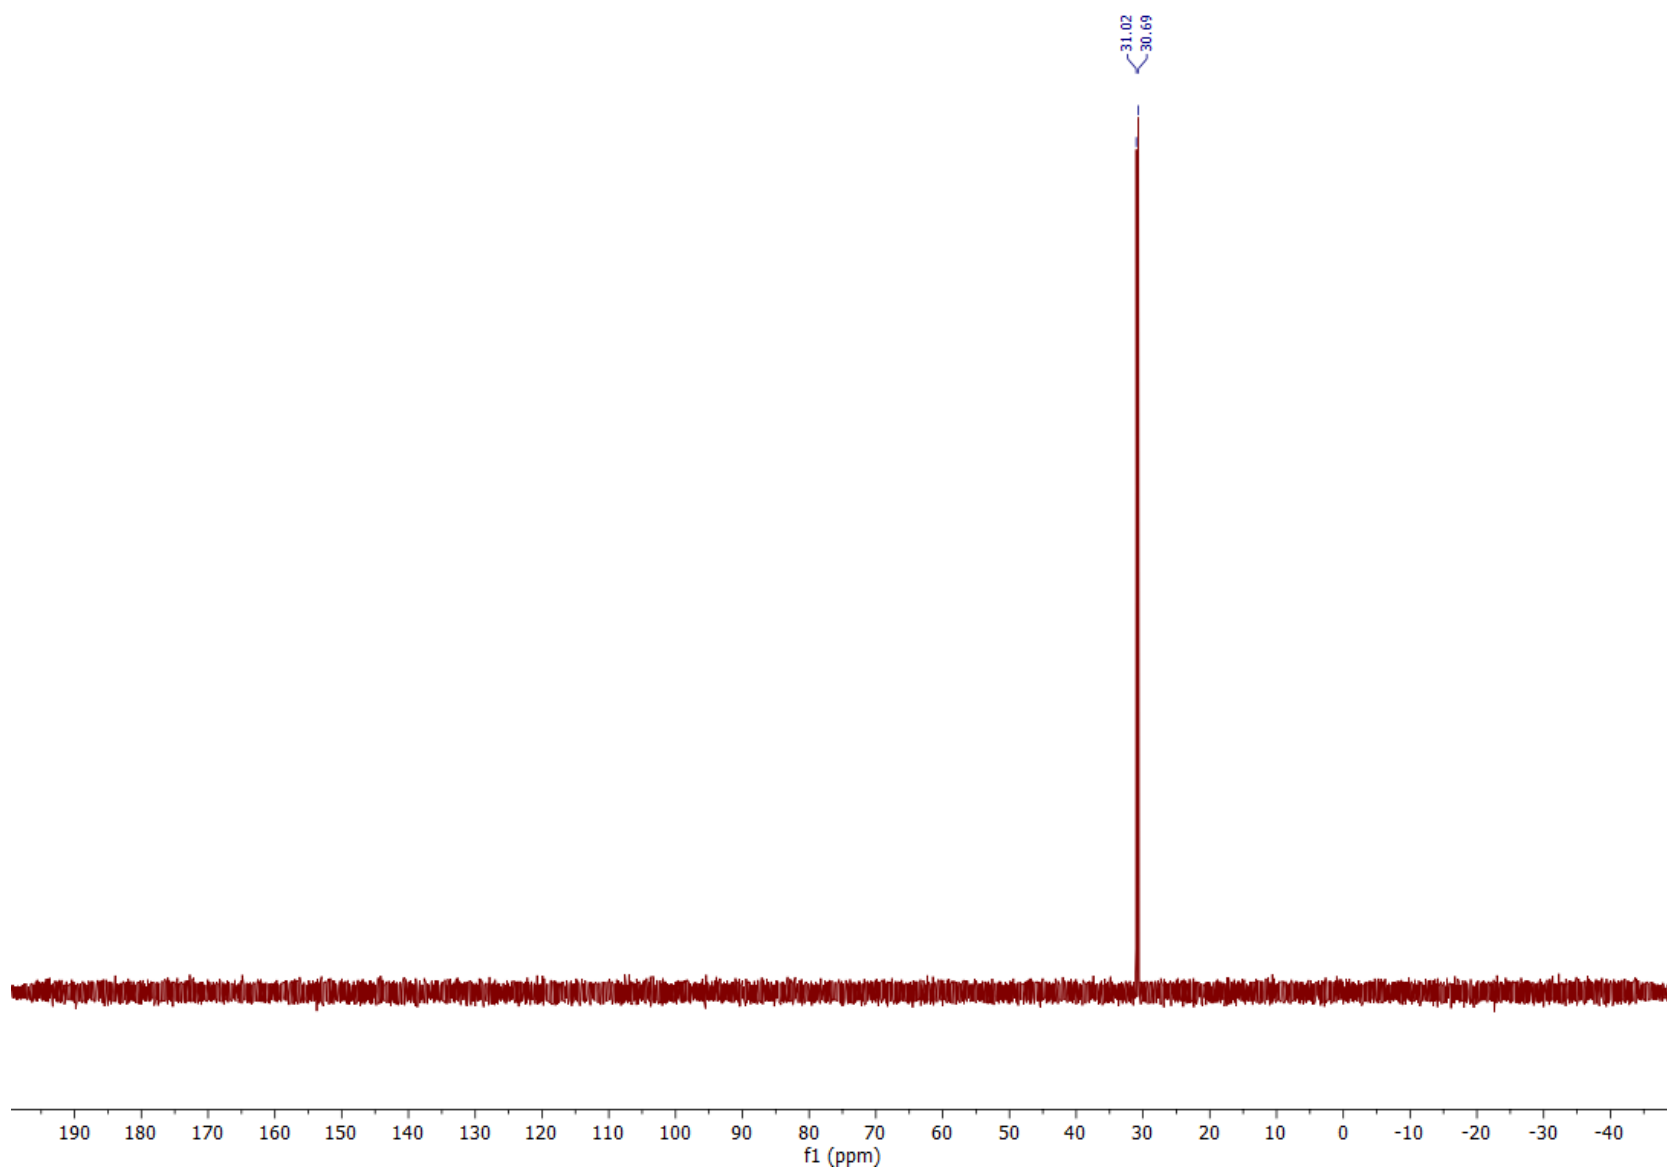

**Figure S37.**  $^{31}\text{P}$  NMR spectrum of **1c**.

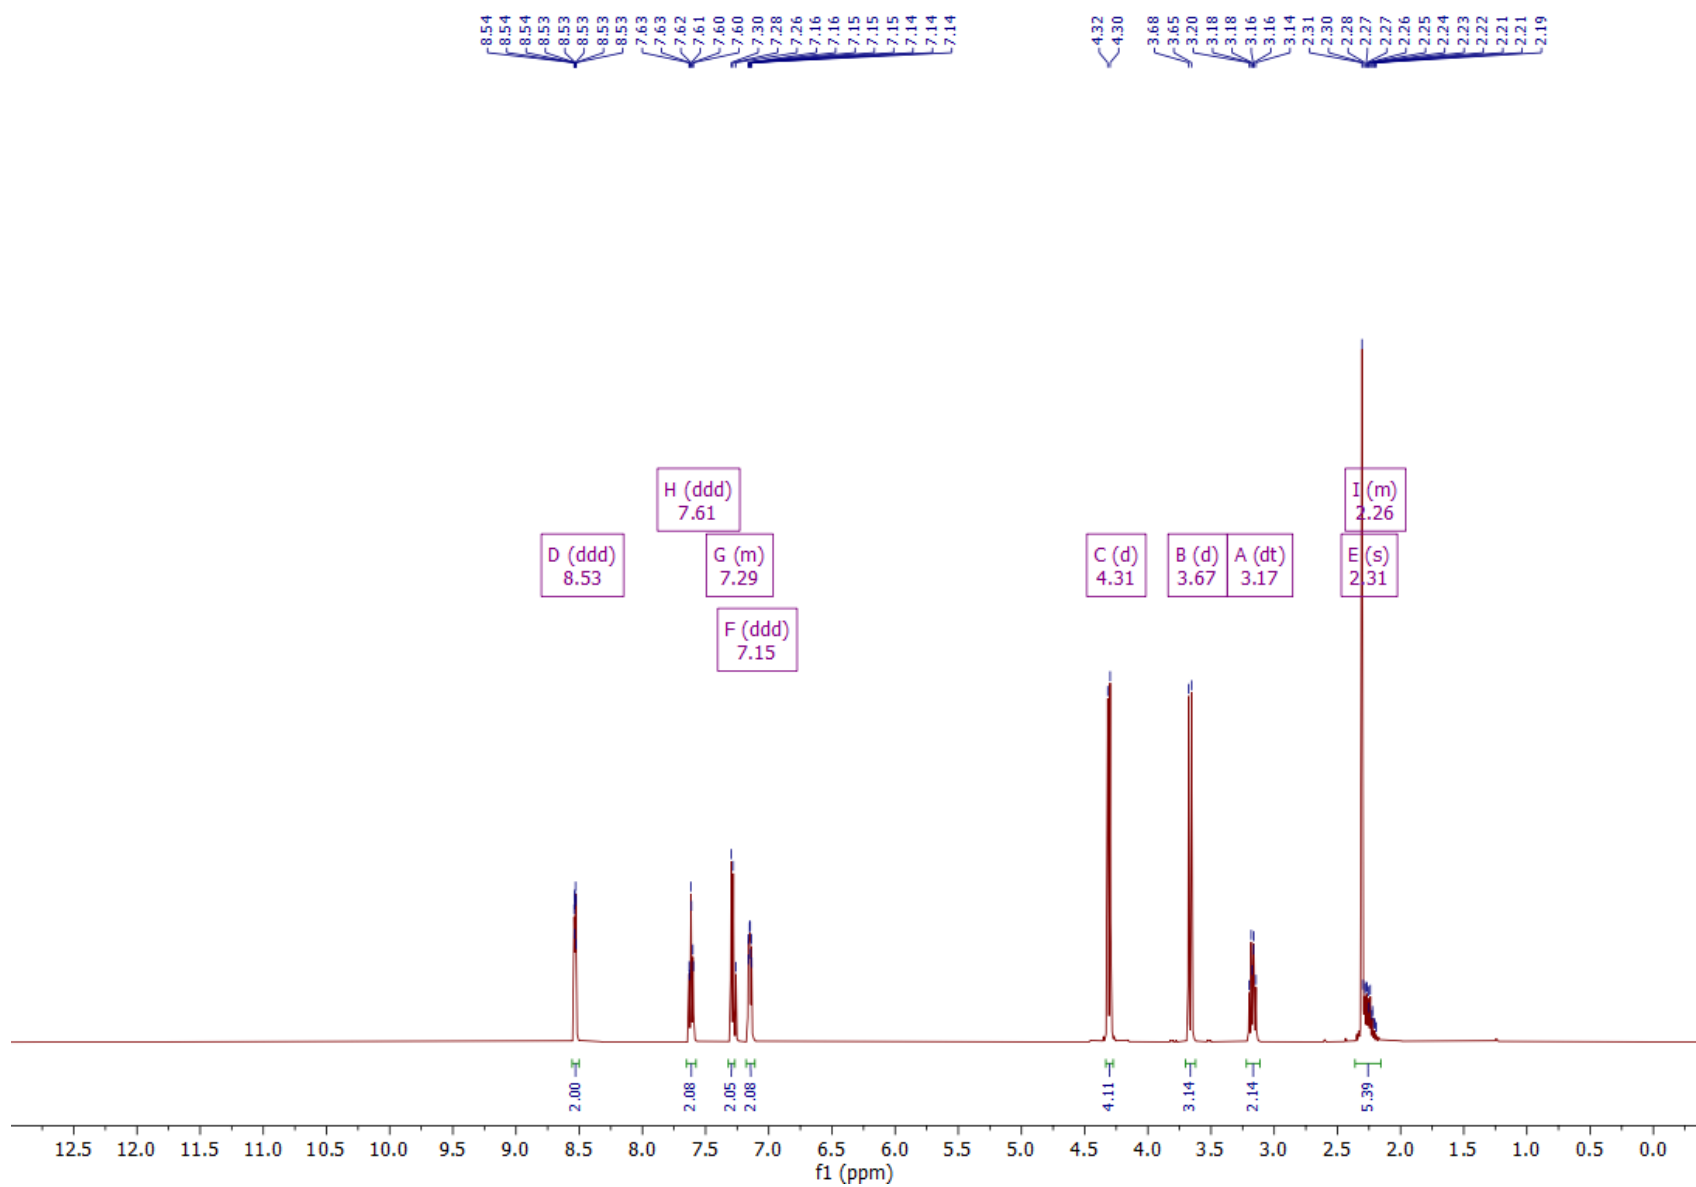

Figure S38.  $^1\text{H}$  NMR spectrum of **1d**.

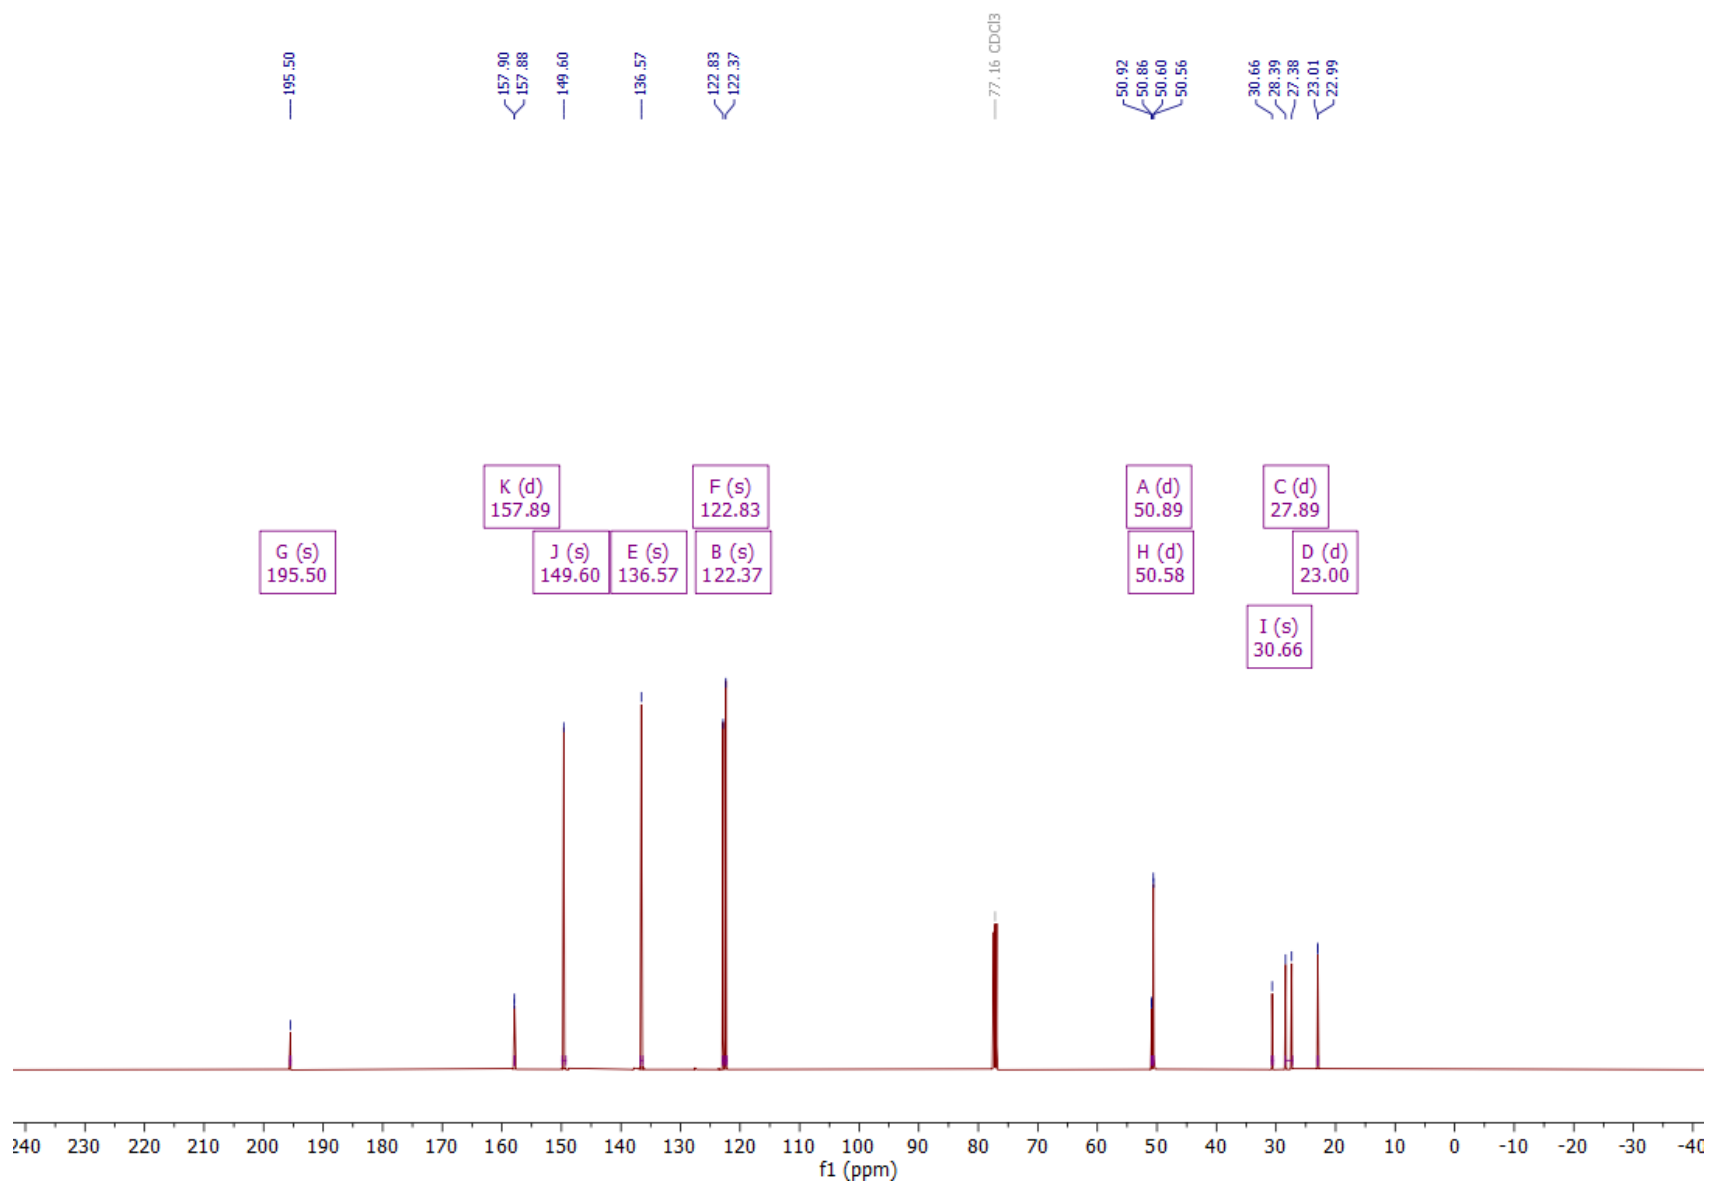

**Figure S39.** <sup>13</sup>C NMR spectrum of **1d**.

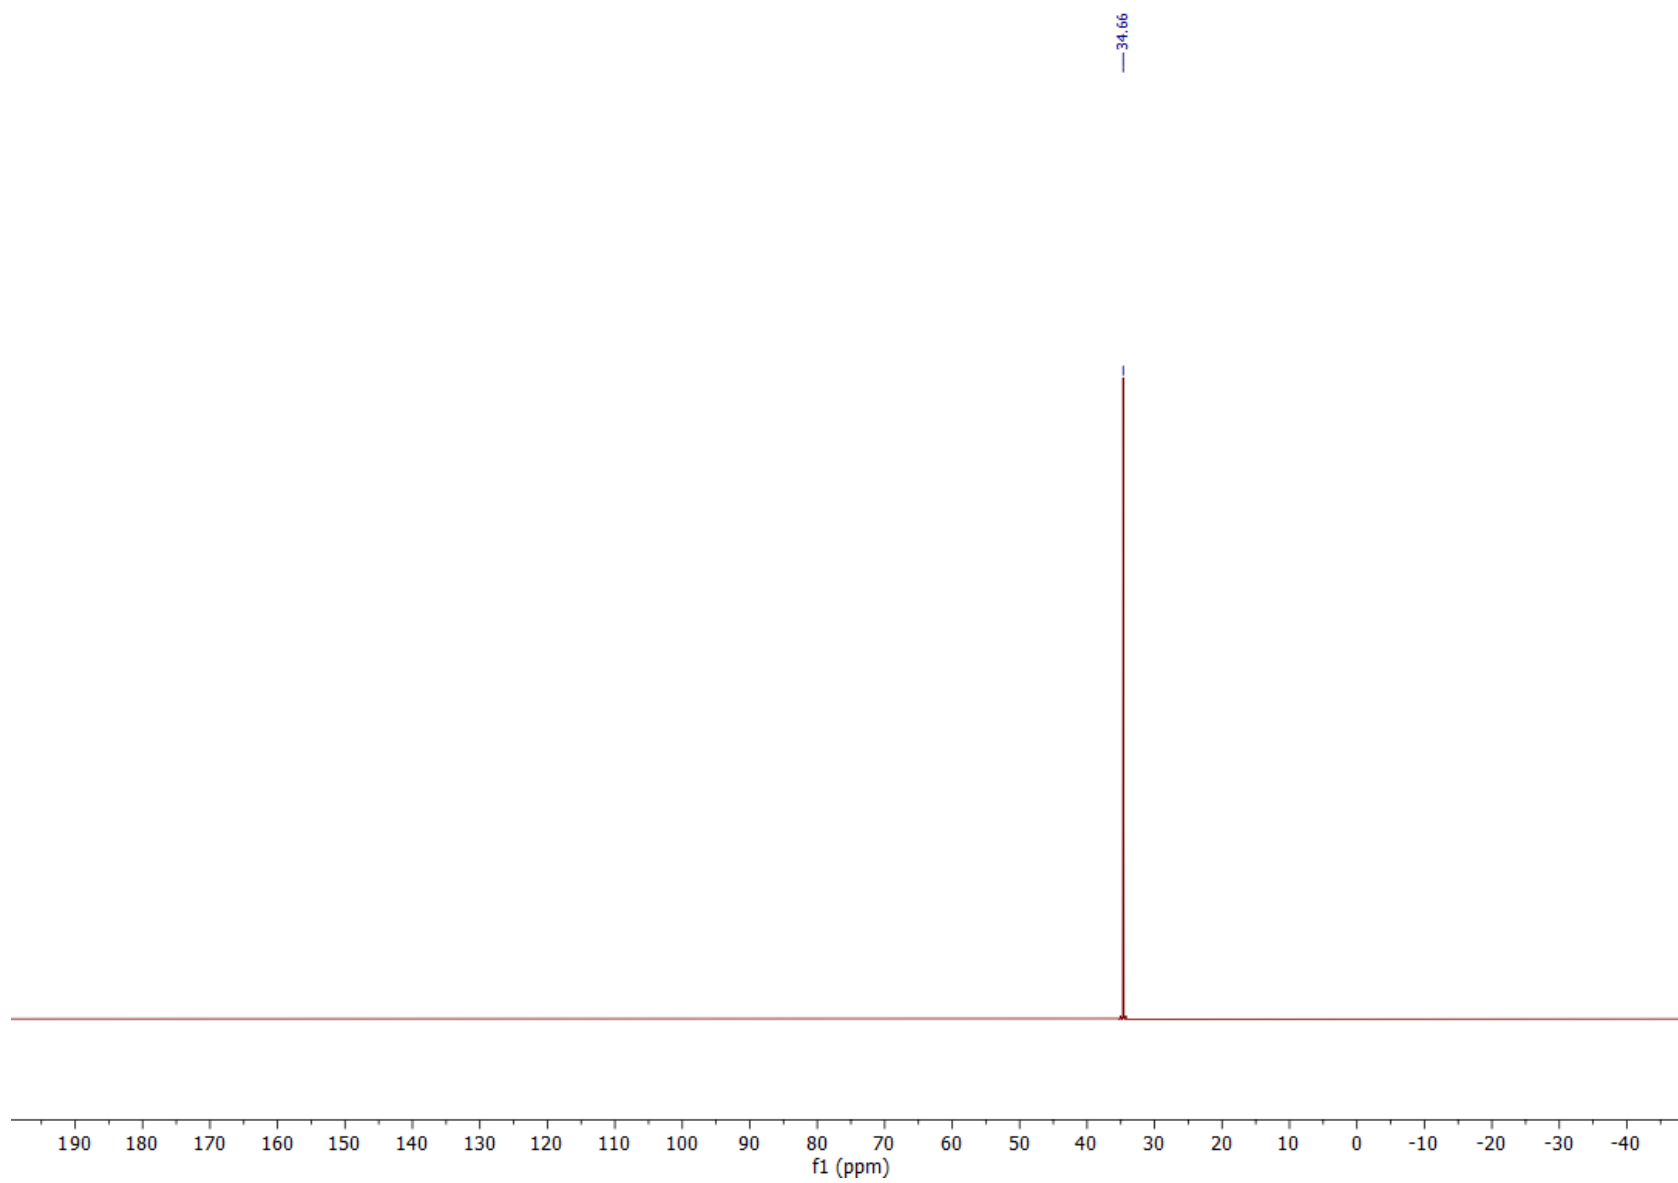

**Figure S40.**  $^{31}\text{P}$  NMR spectrum of **1d**.



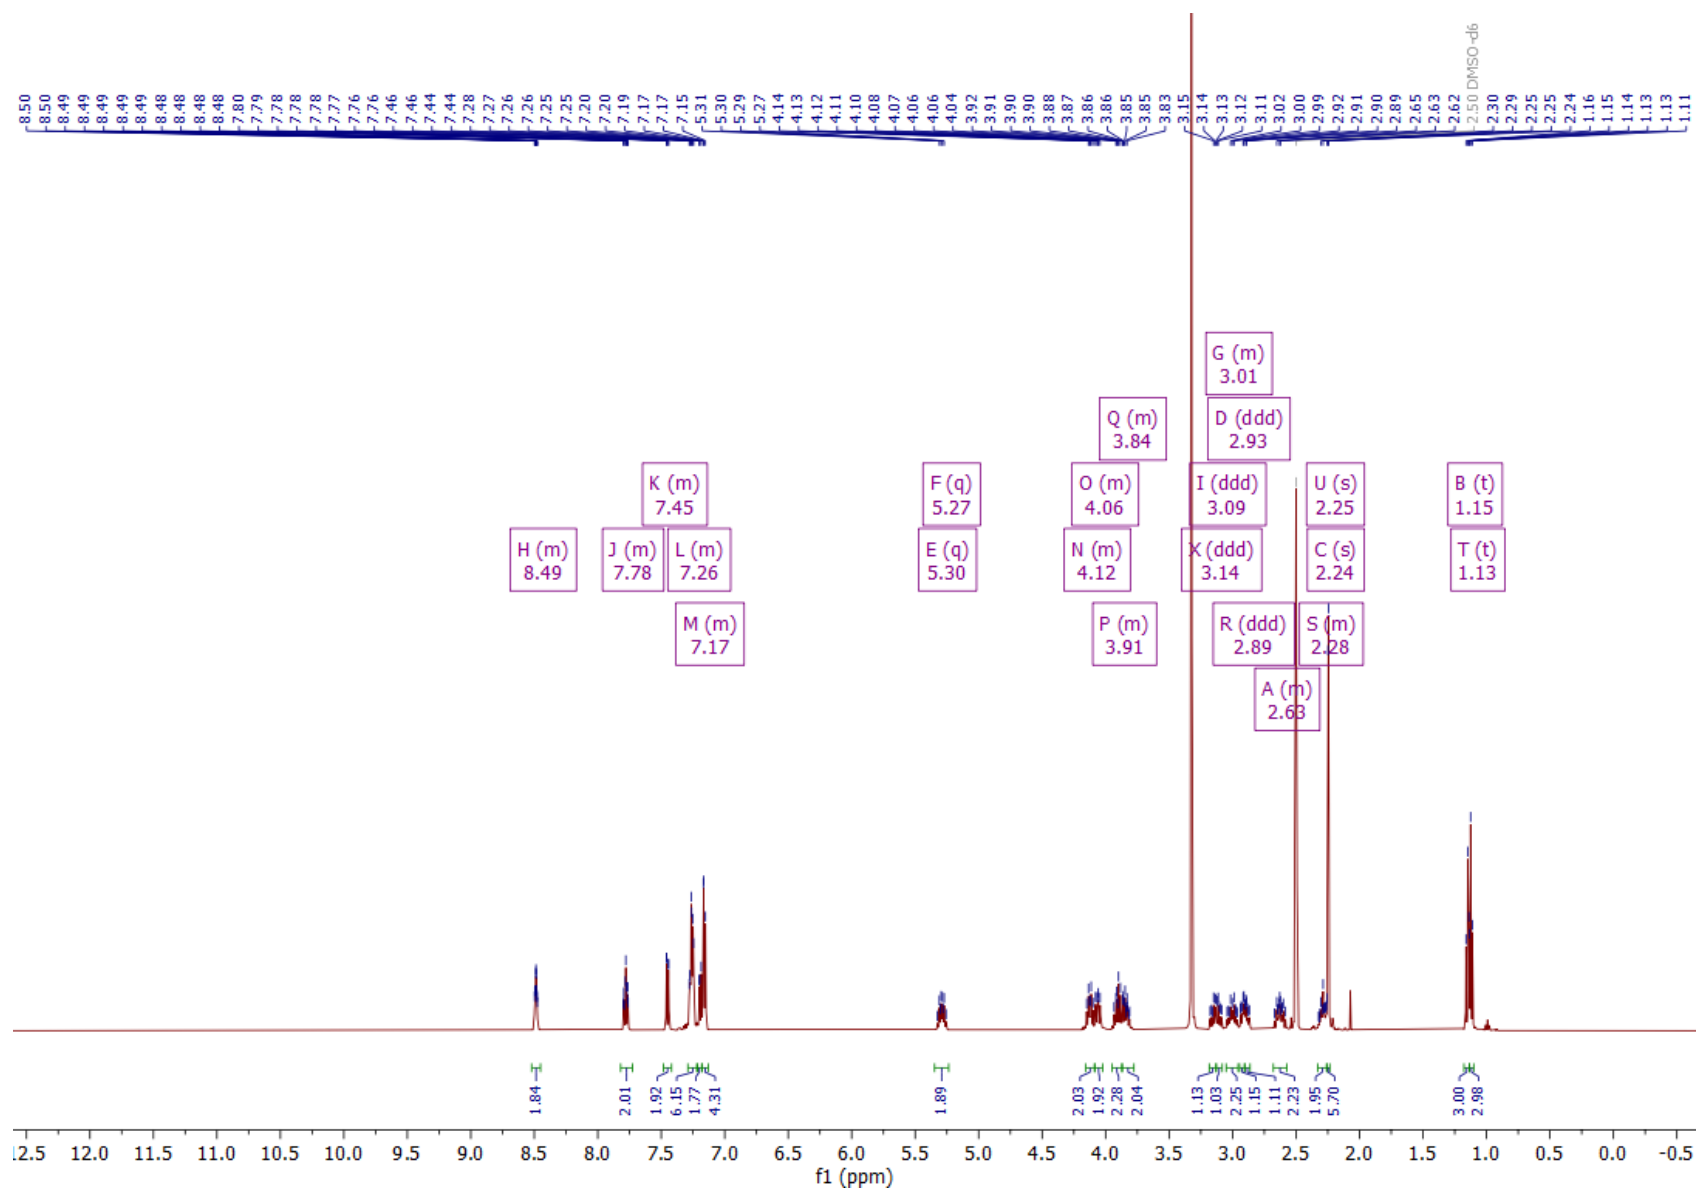

Figure S41.  $^1\text{H}$  NMR spectrum of **1e**.

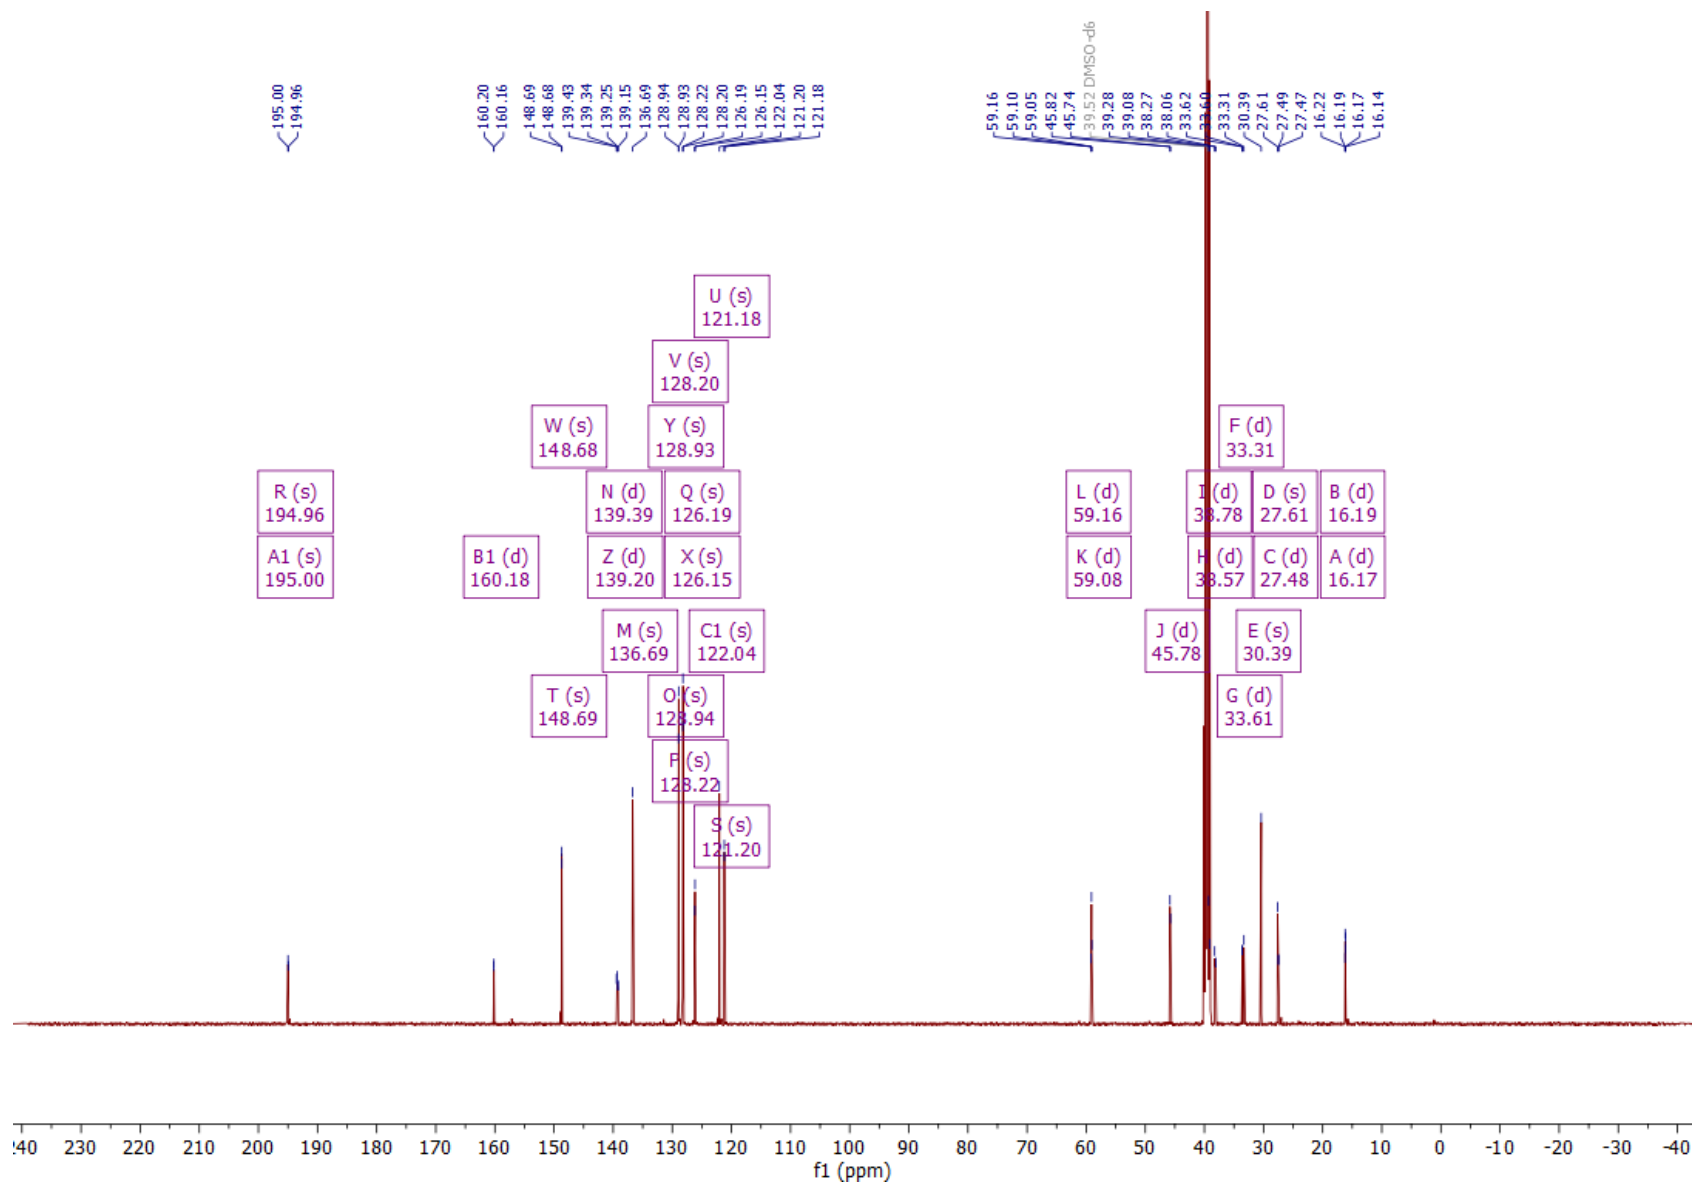

Figure S42.  $^{13}\text{C}$  NMR spectrum of **1e**.

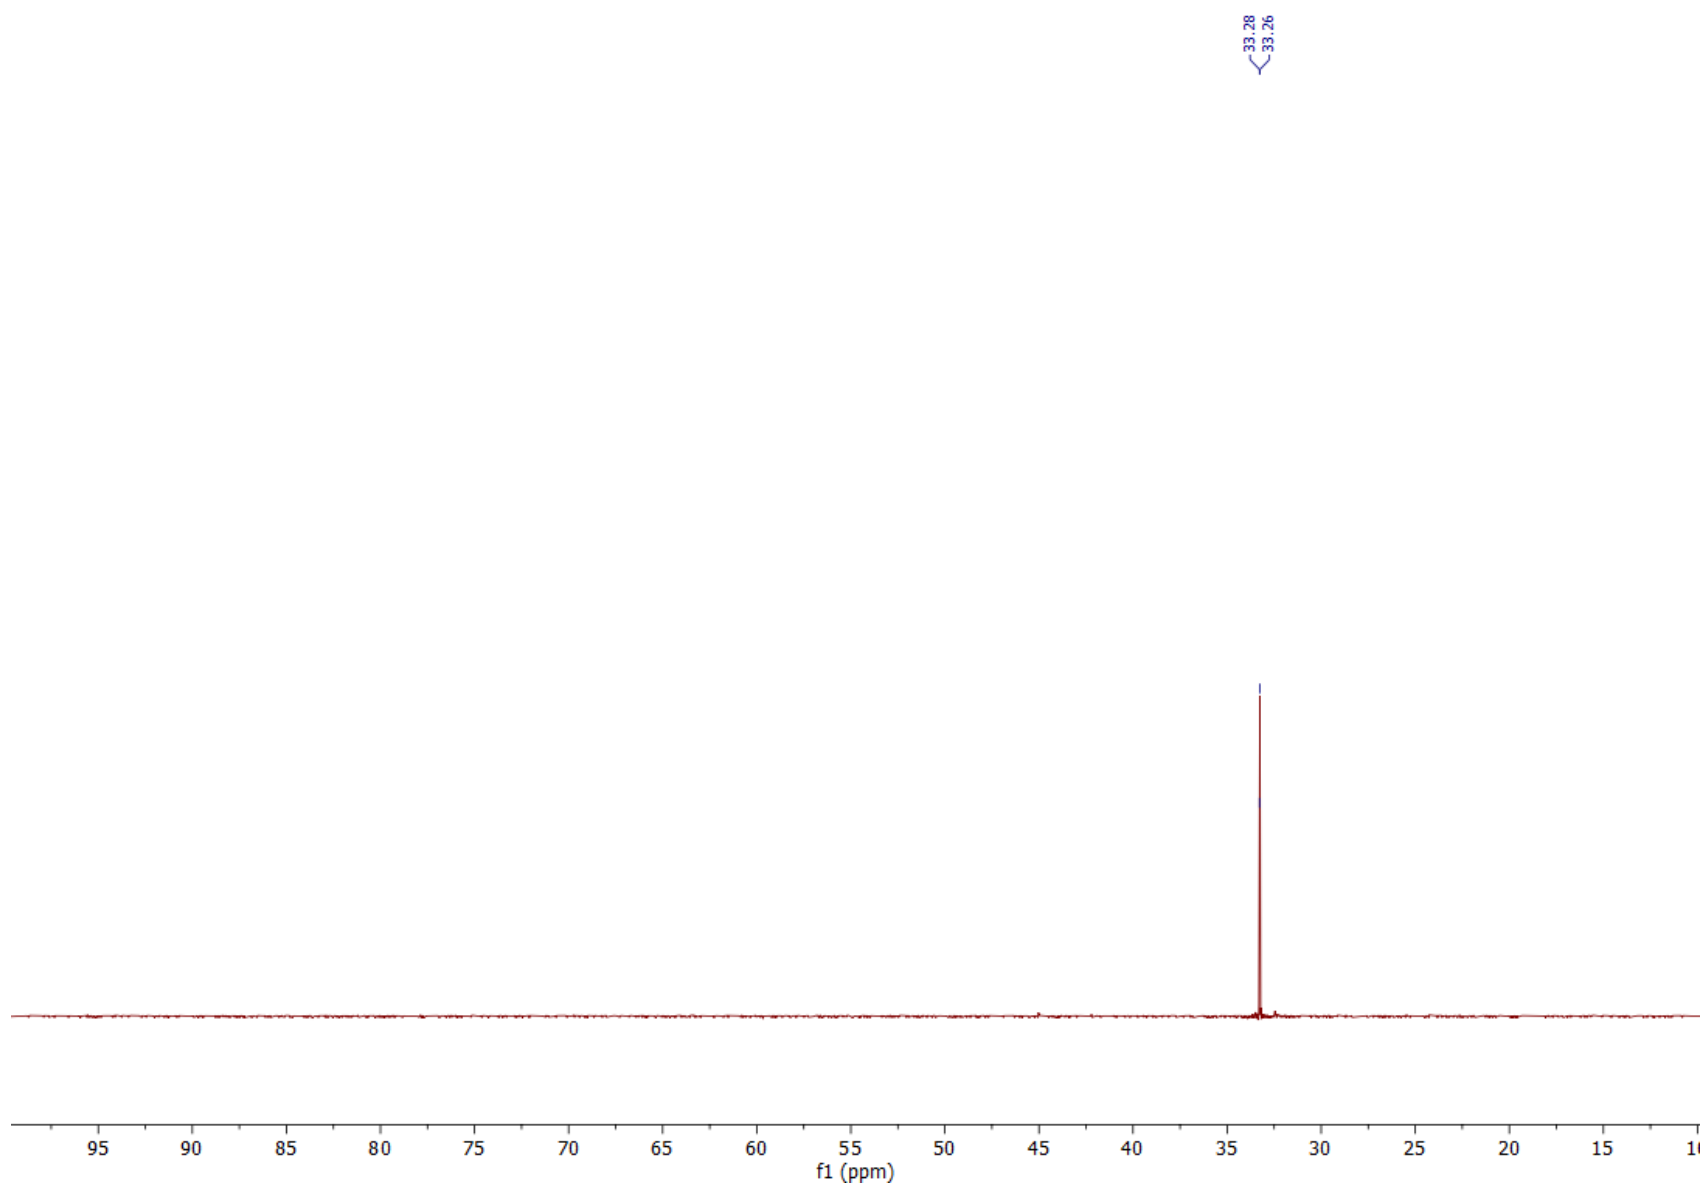

**Figure S43.**  $^{31}\text{P}$  NMR spectrum of **1e**.

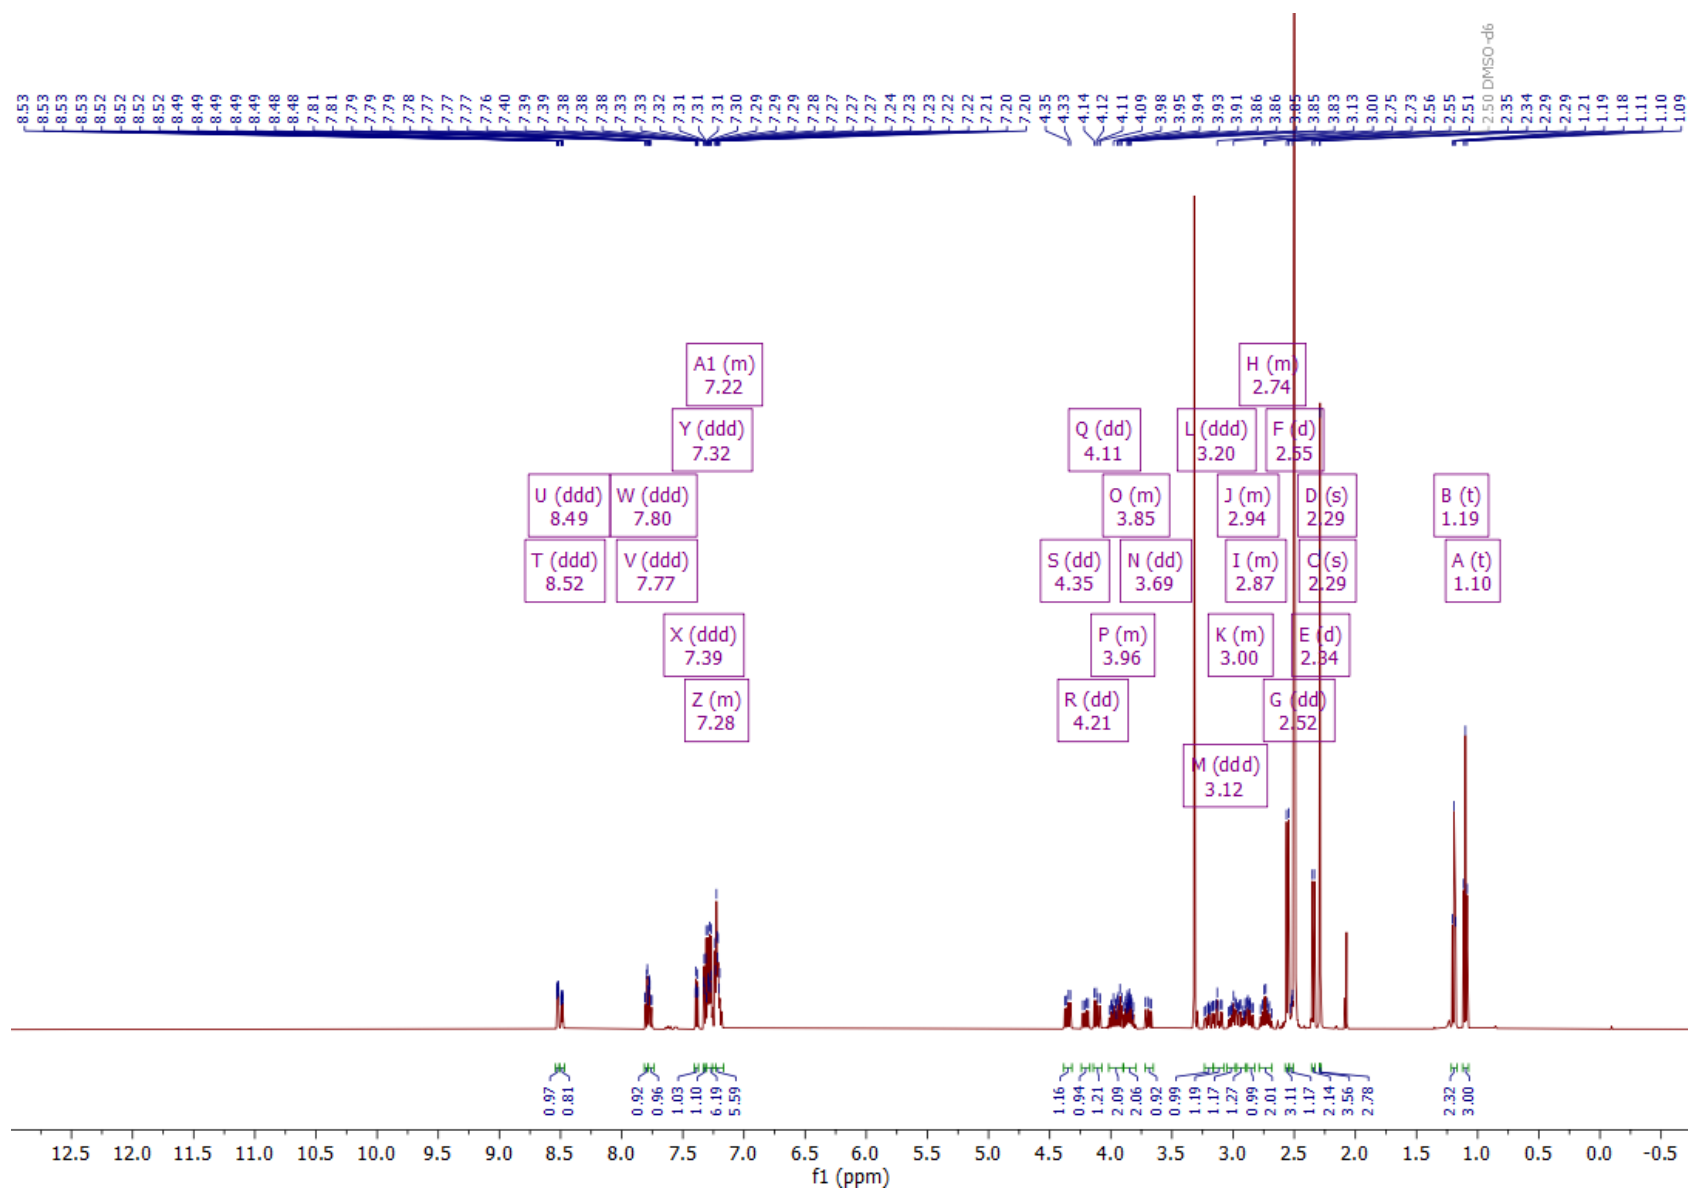

Figure S44. <sup>1</sup>H NMR spectrum of **1f**.

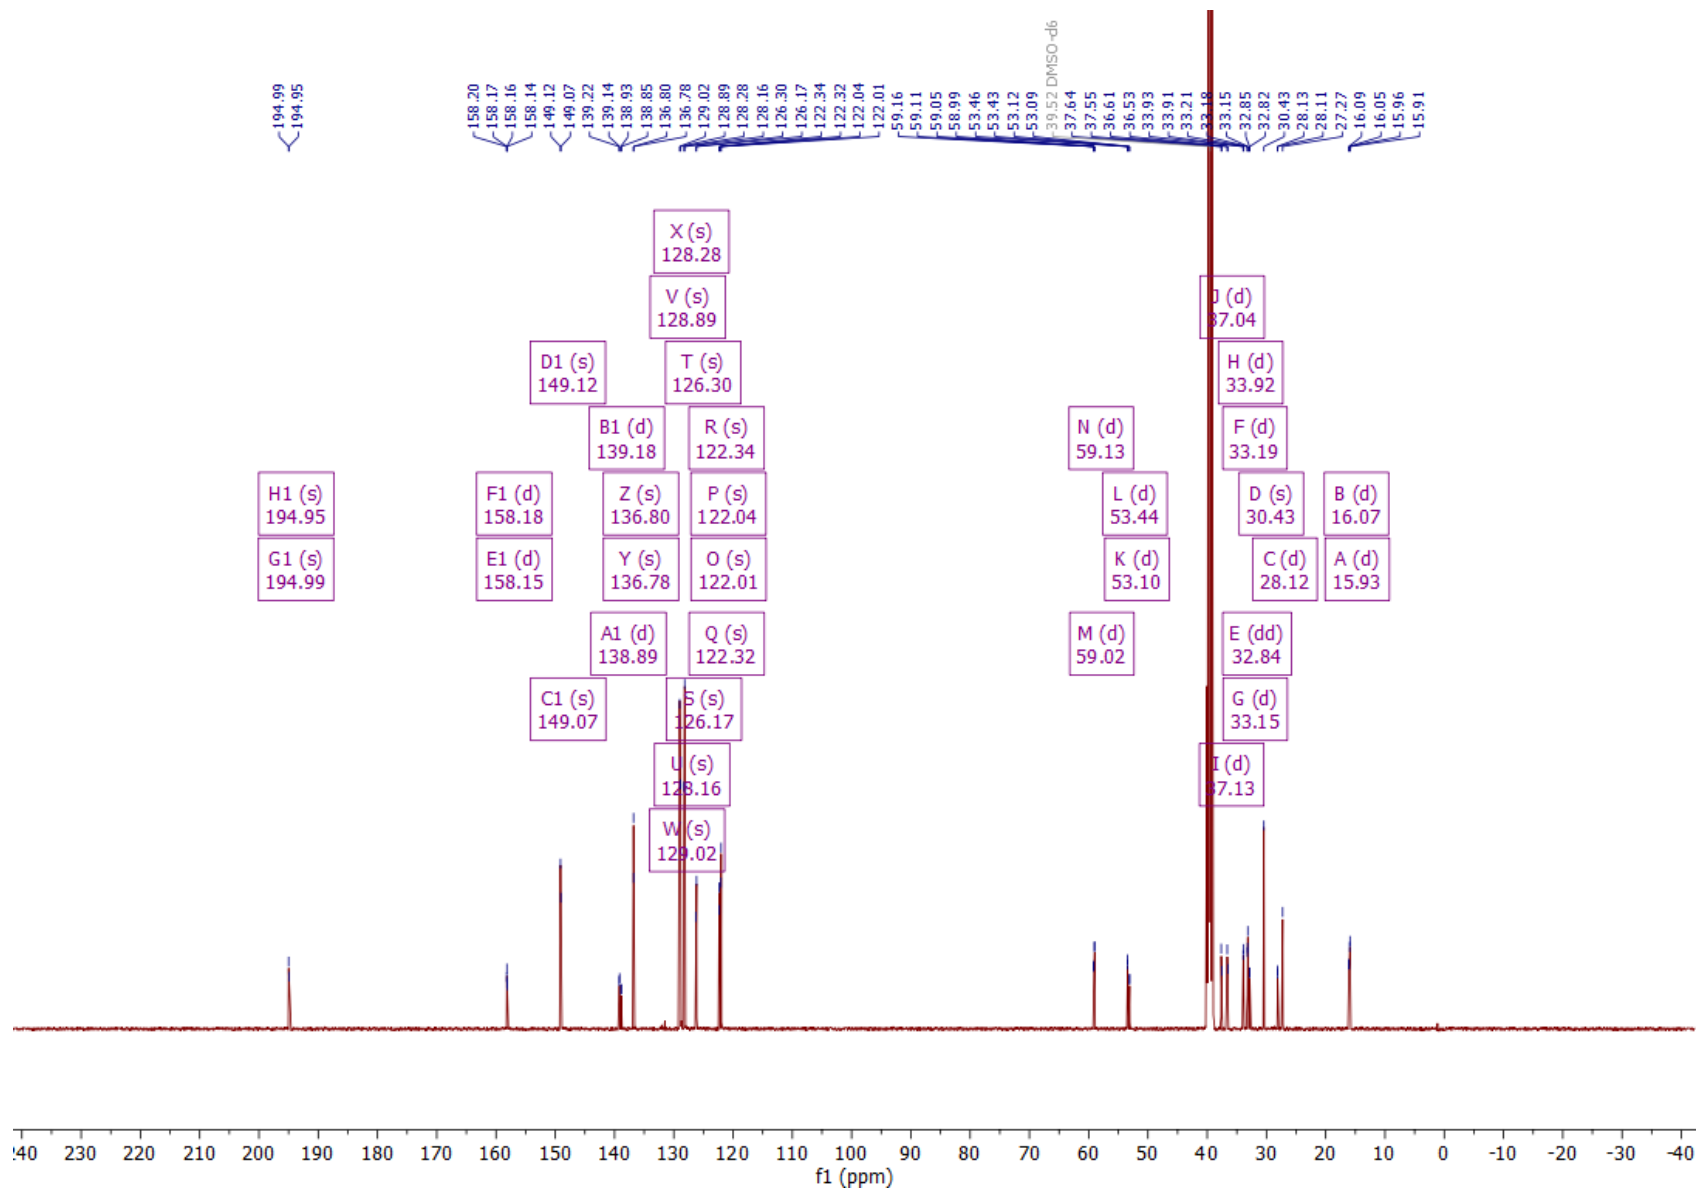

Figure S45.  $^{13}\text{C}$  NMR spectrum of **1f**.

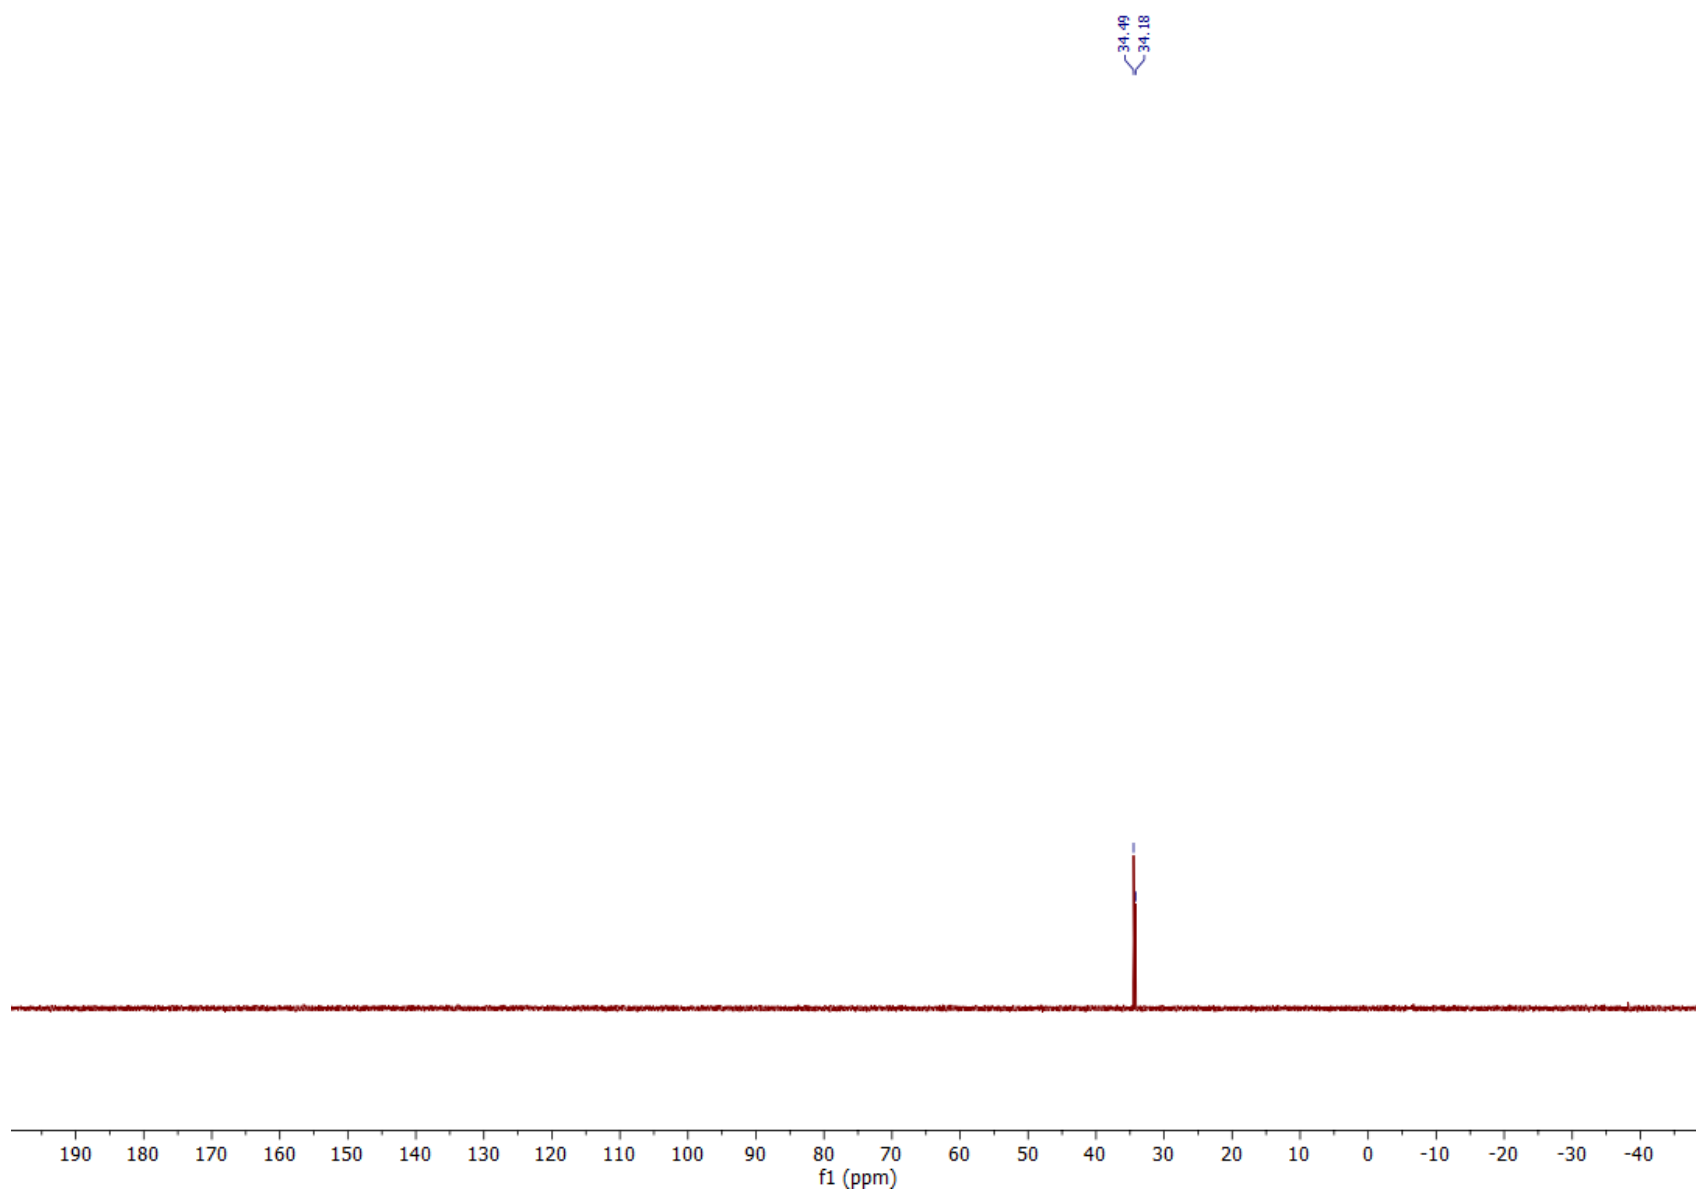

**Figure S46.**  $^{31}\text{P}$  NMR spectrum of **1f**.

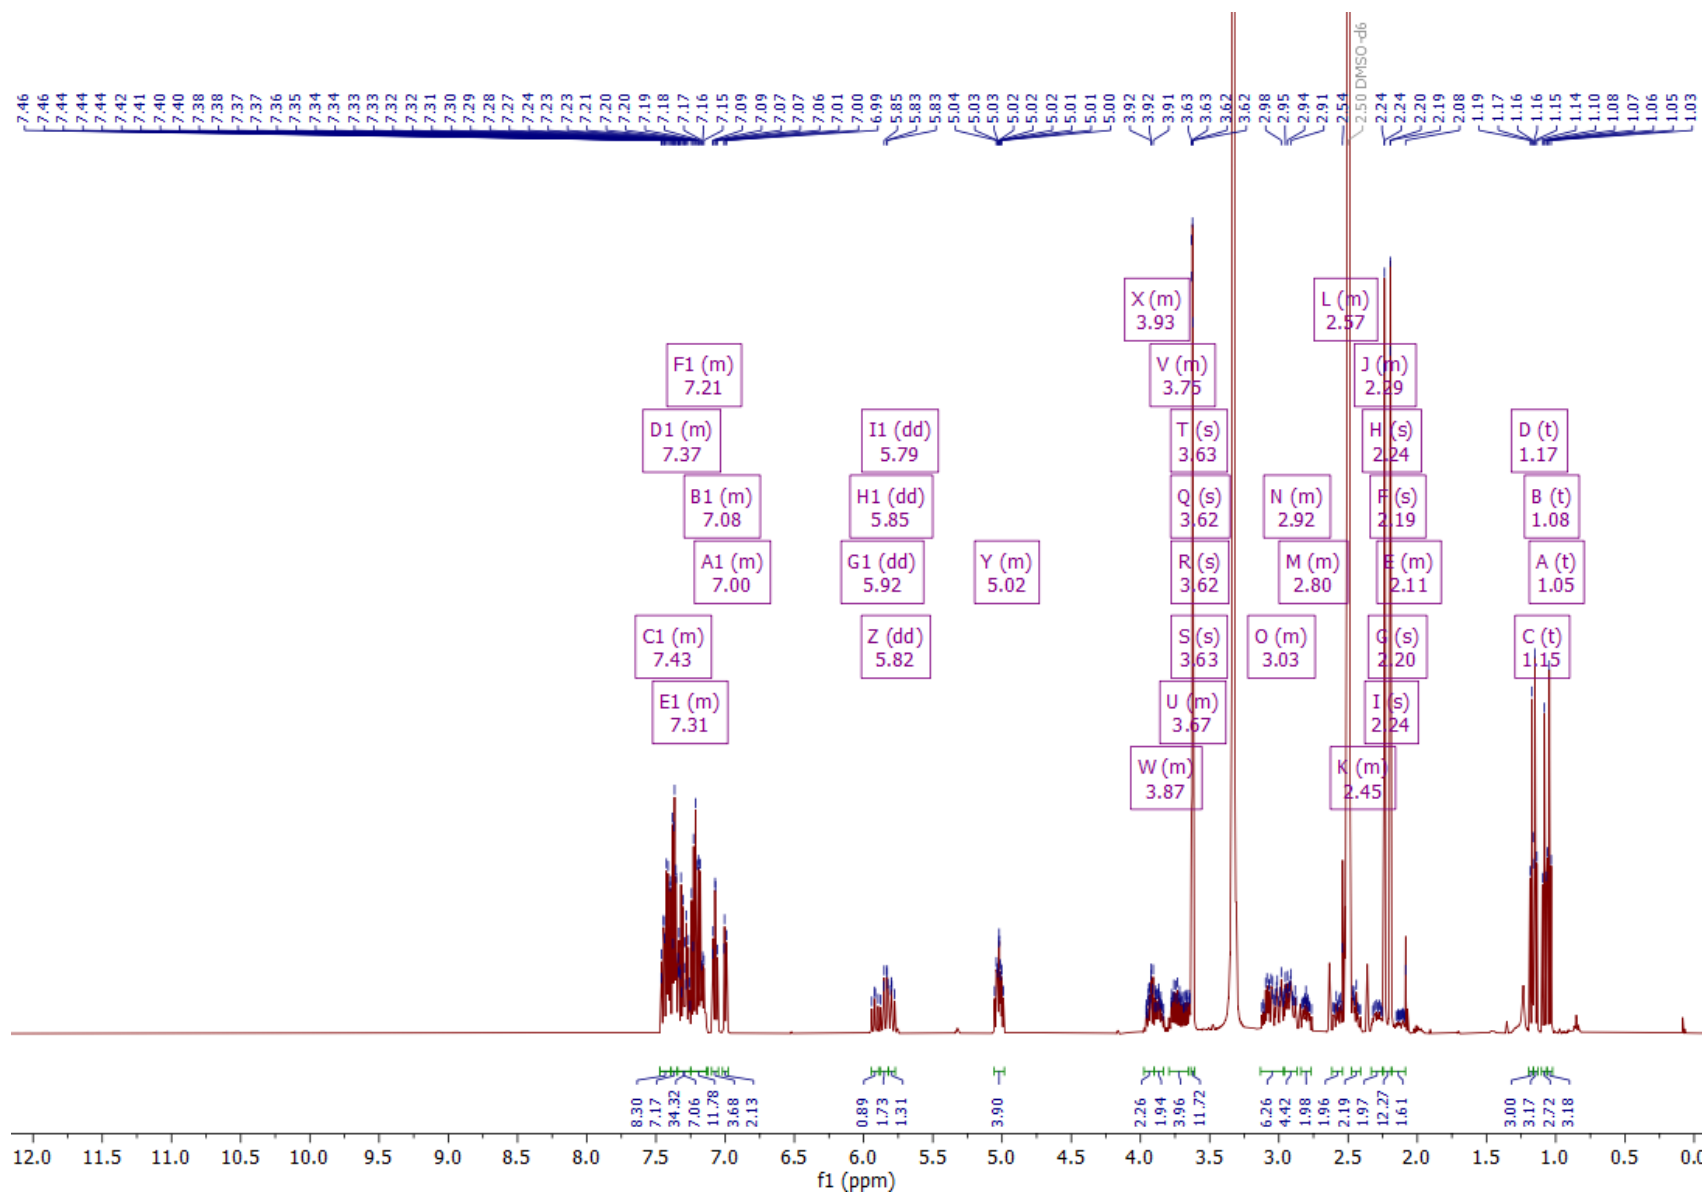

Figure S47. <sup>1</sup>H NMR spectrum of **1g**.

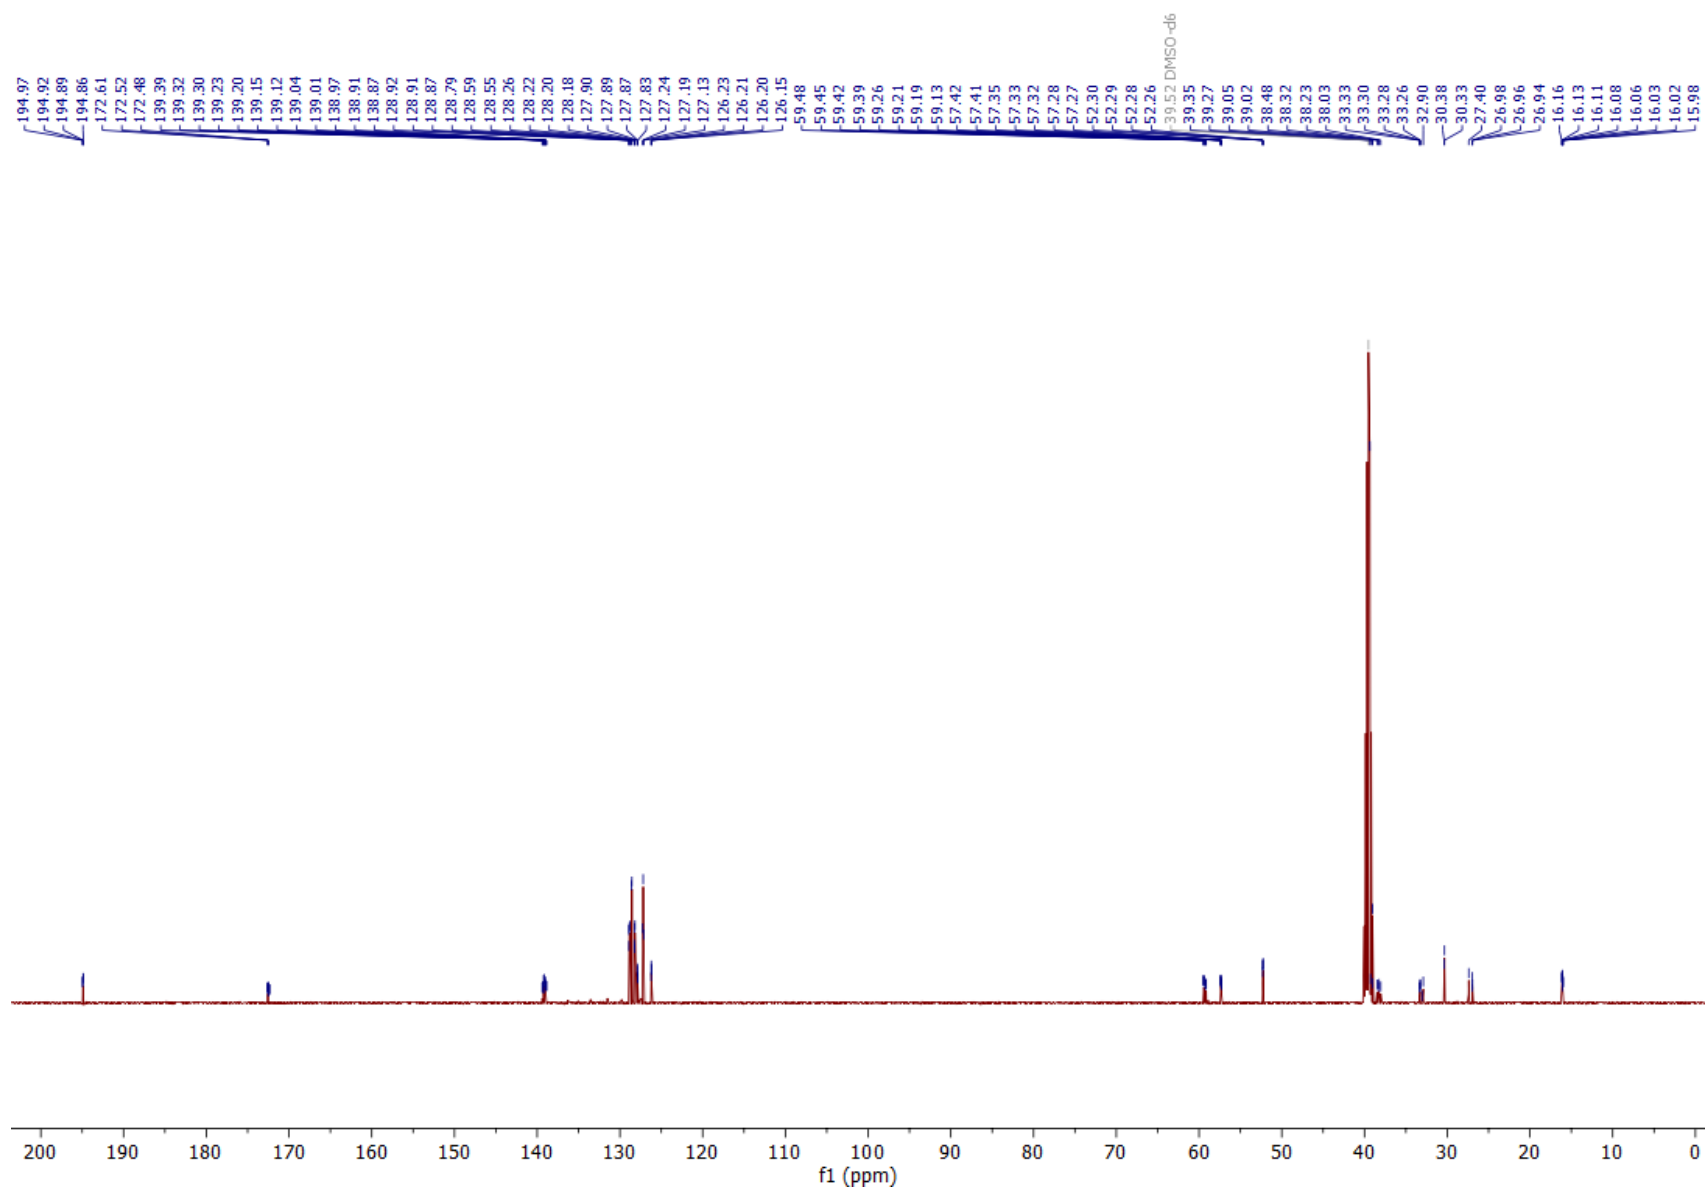

Figure S48. <sup>13</sup>C NMR spectrum of **1g**.



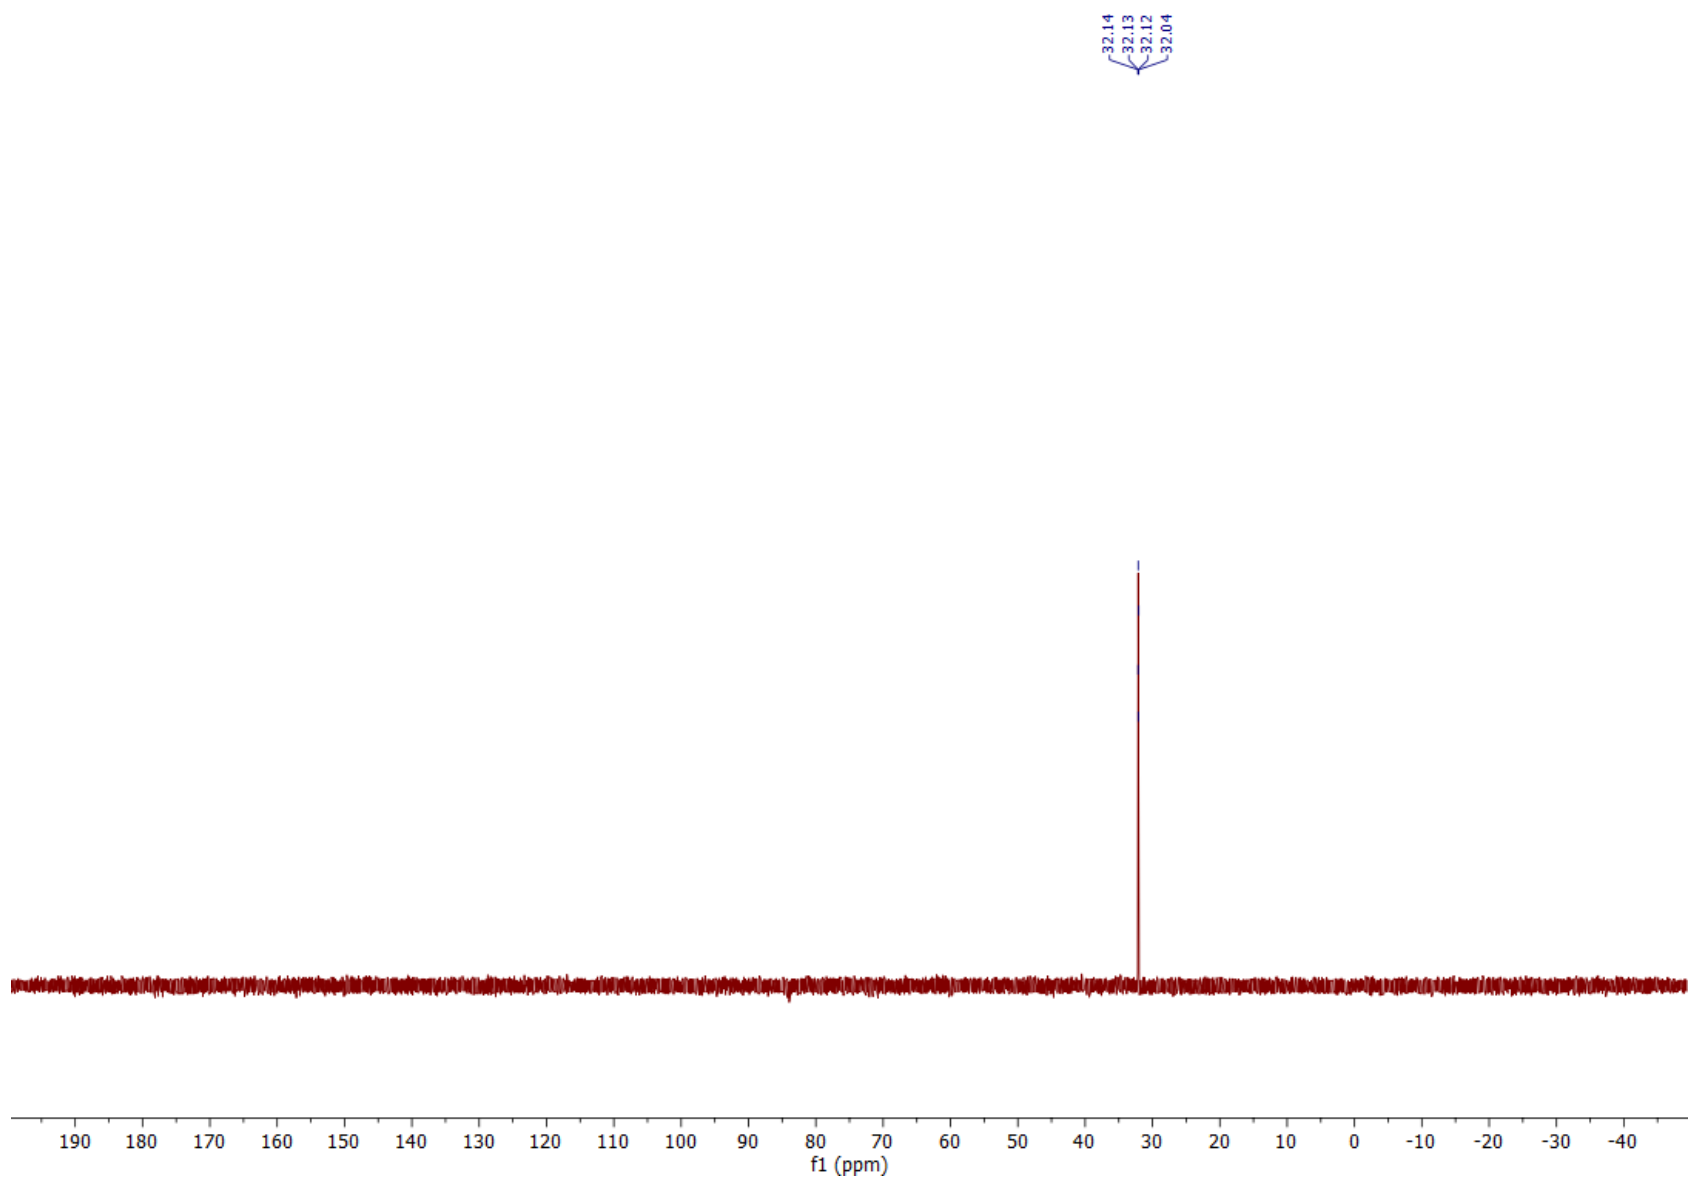

Figure S49.  $^{31}\text{P}$  NMR spectrum of **1g**.

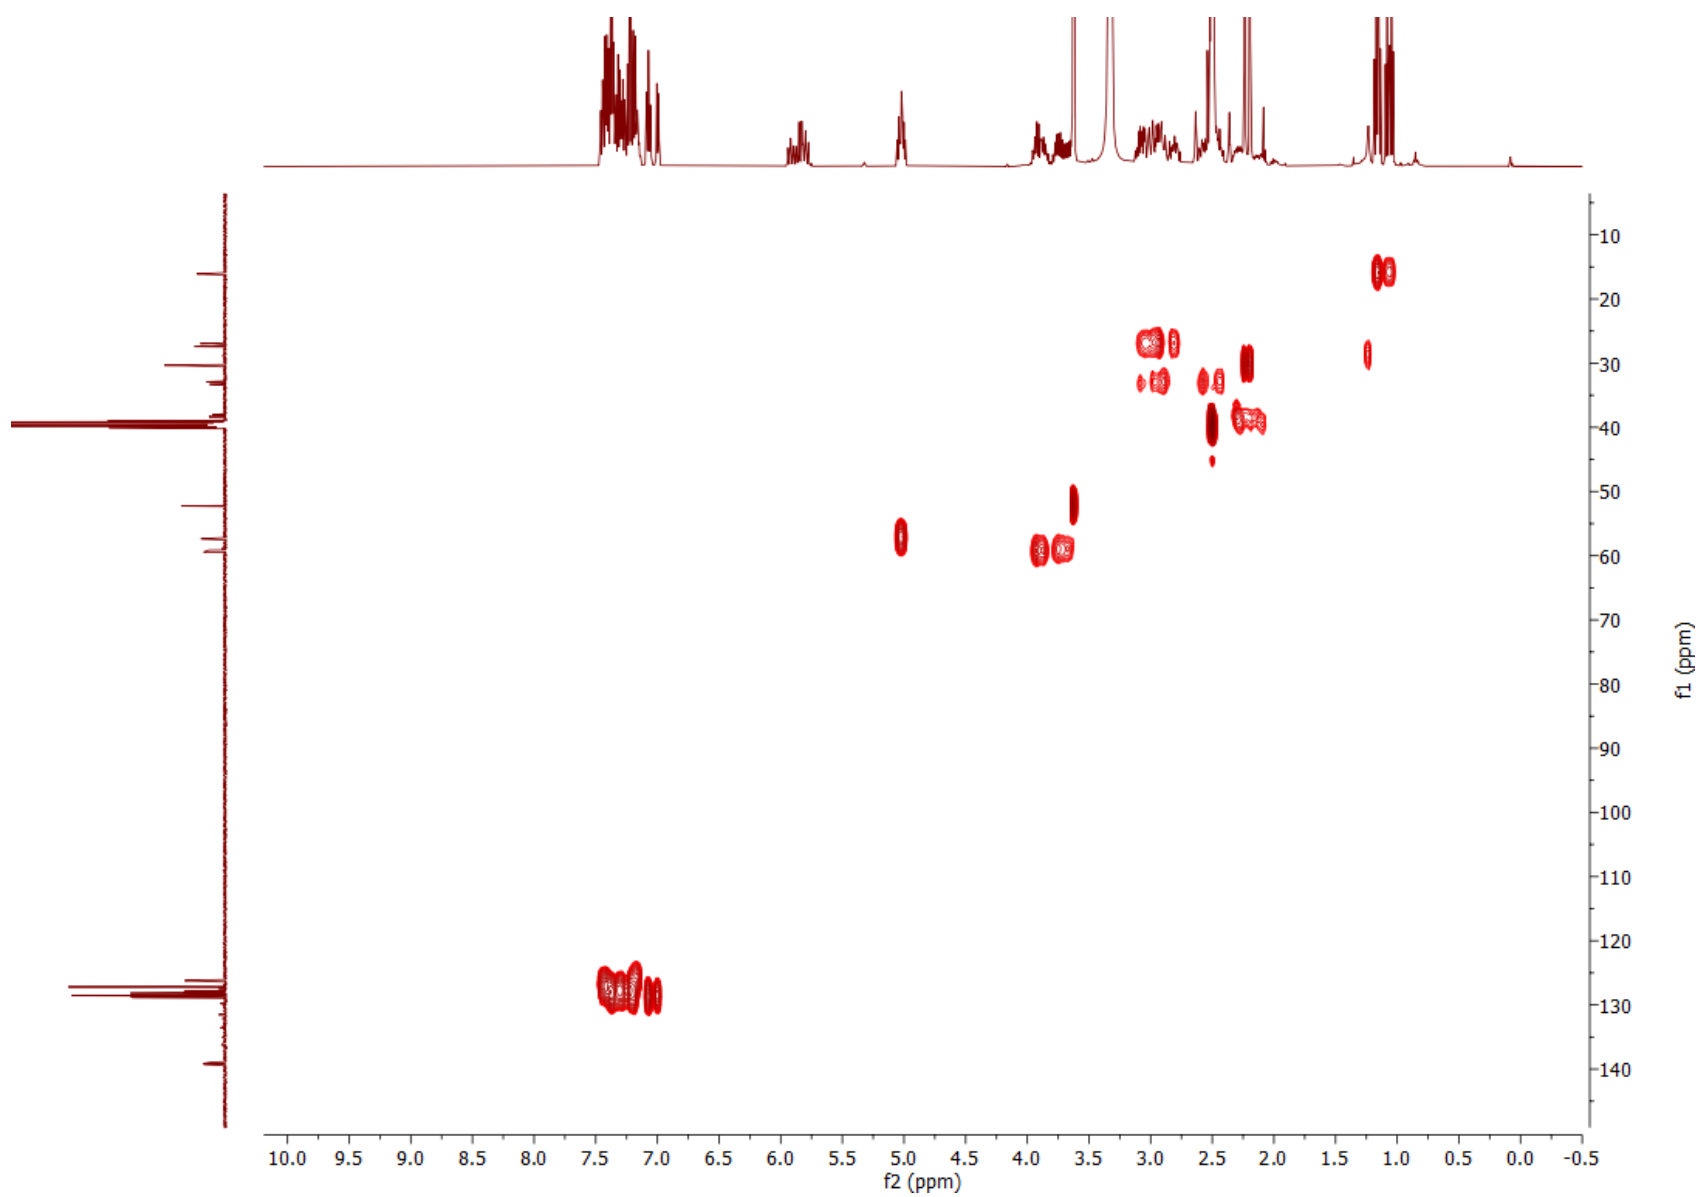

**Figure S50.**  $^1\text{H}$ - $^{13}\text{C}$  HSQC NMR spectrum of **1g**.

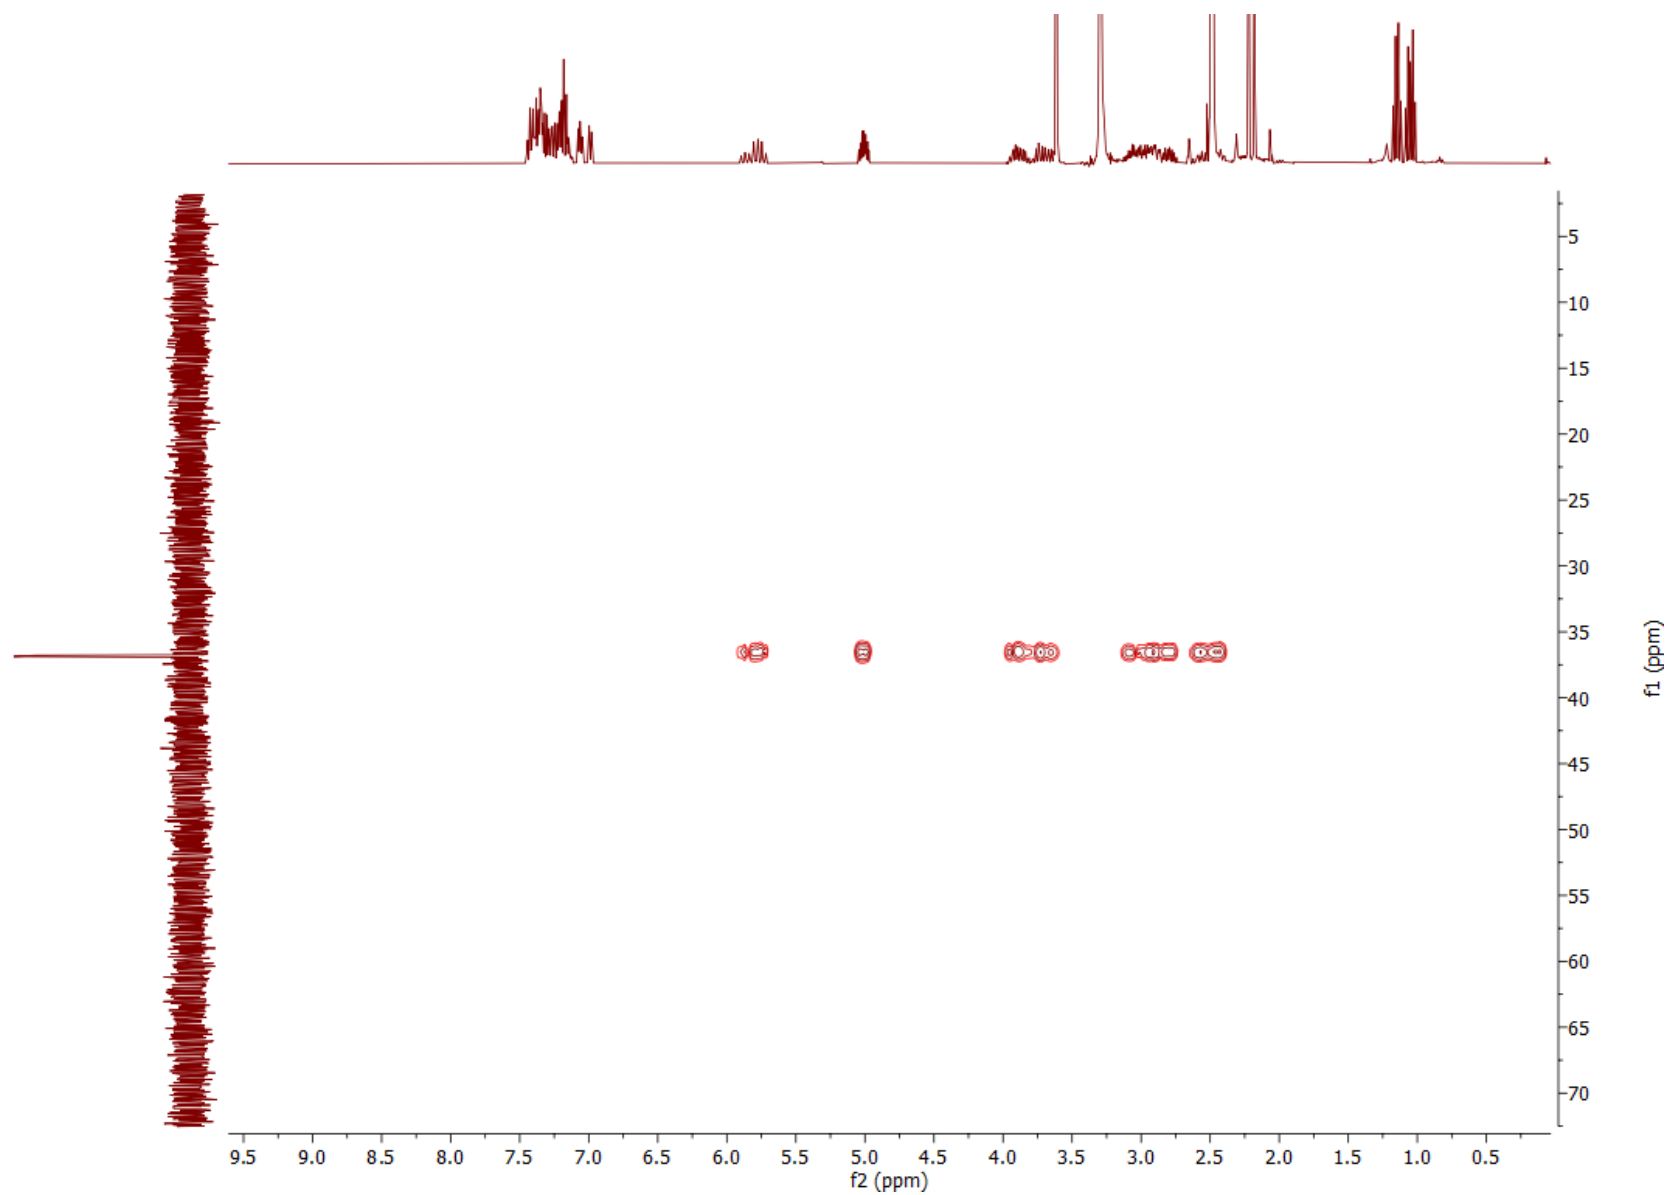

Figure S51.  $^1\text{H}$ - $^{31}\text{P}$  HMBC NMR spectrum of **1g**.

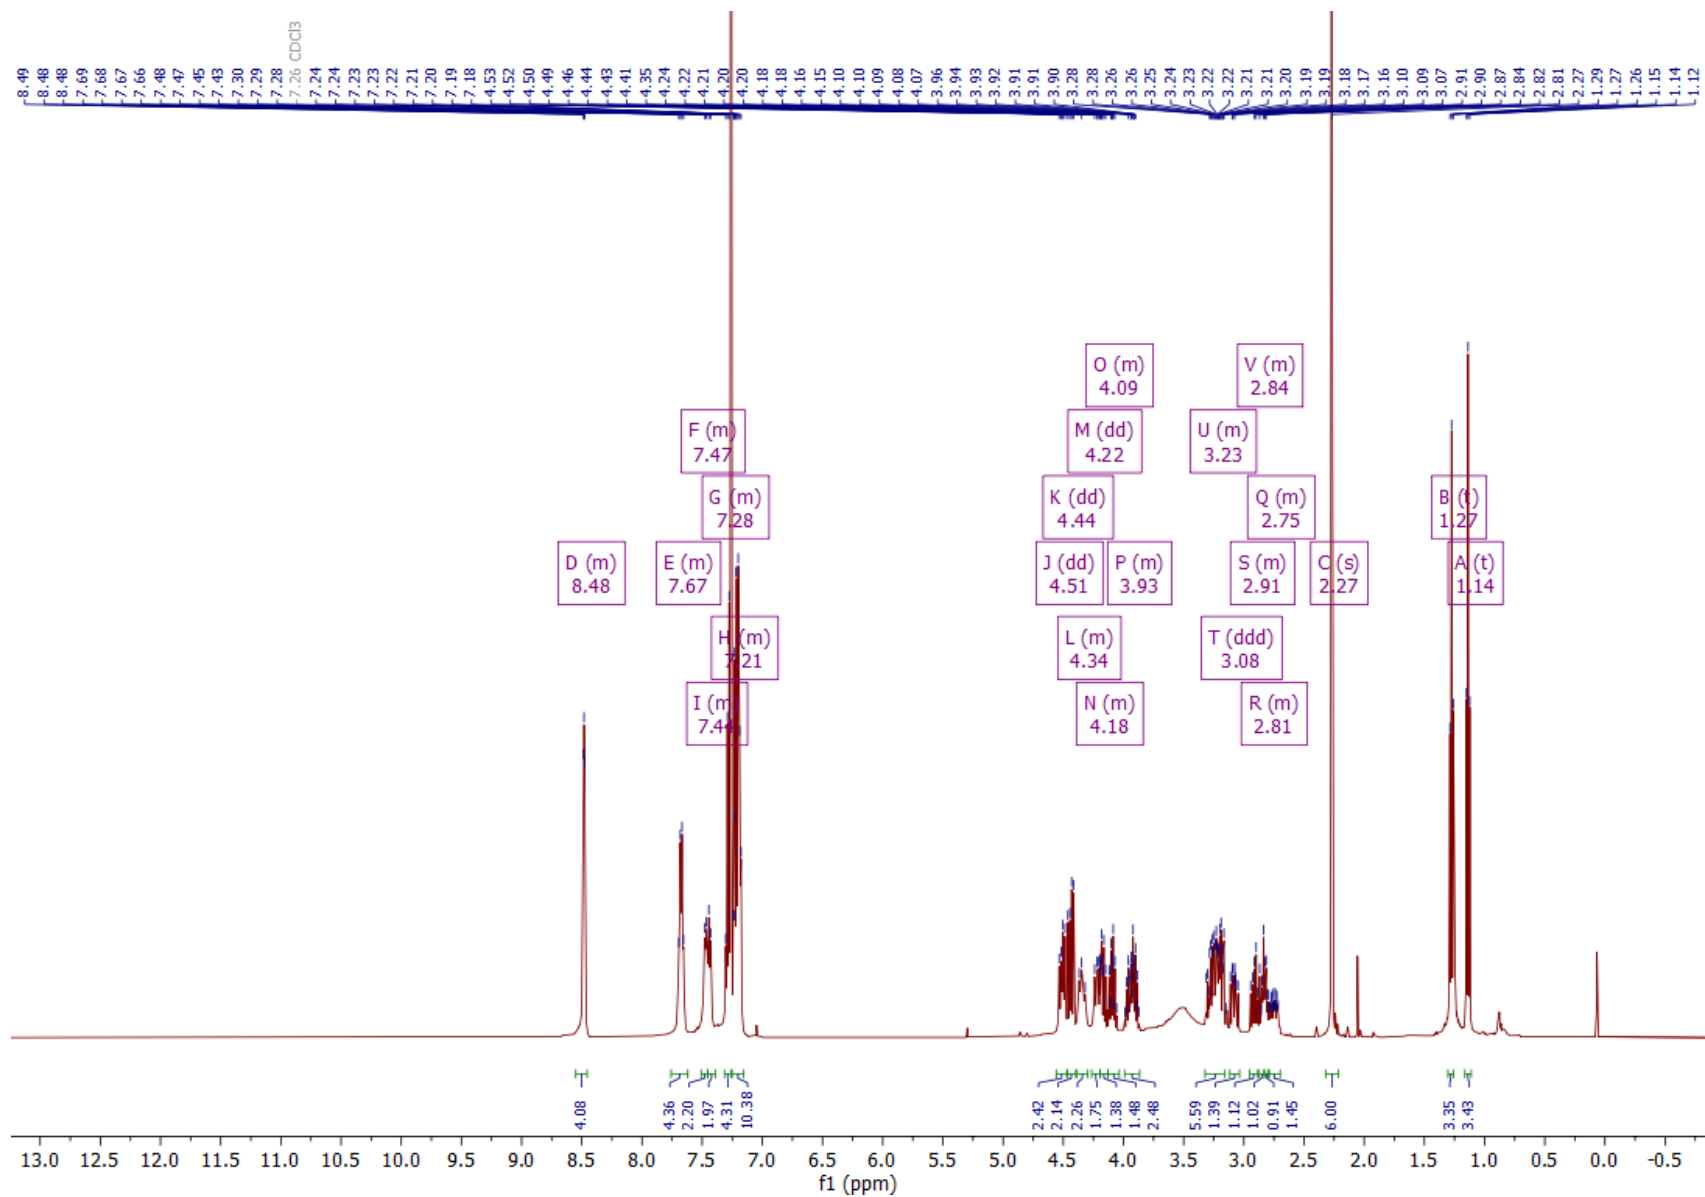

Figure S52.  $^1\text{H}$  NMR spectrum of **1h**.

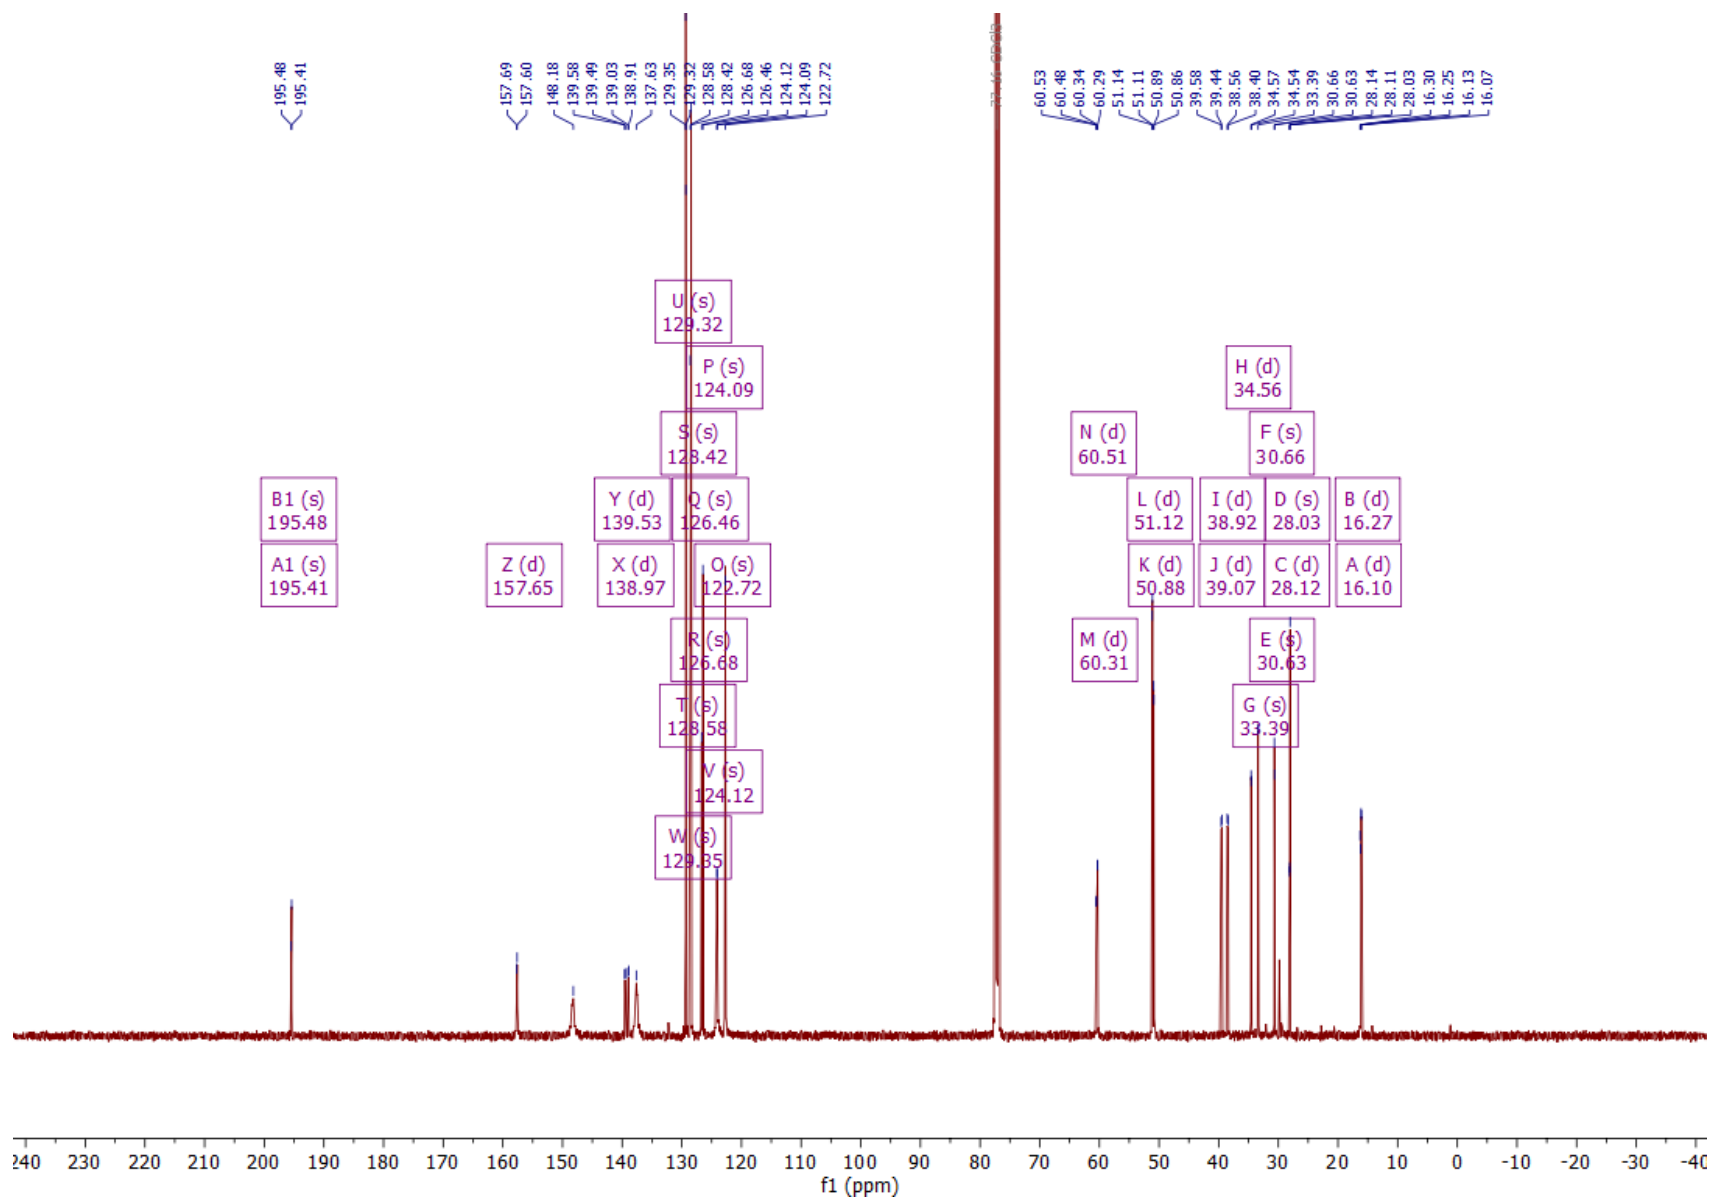

Figure S53. <sup>13</sup>C NMR spectrum of **1h**.

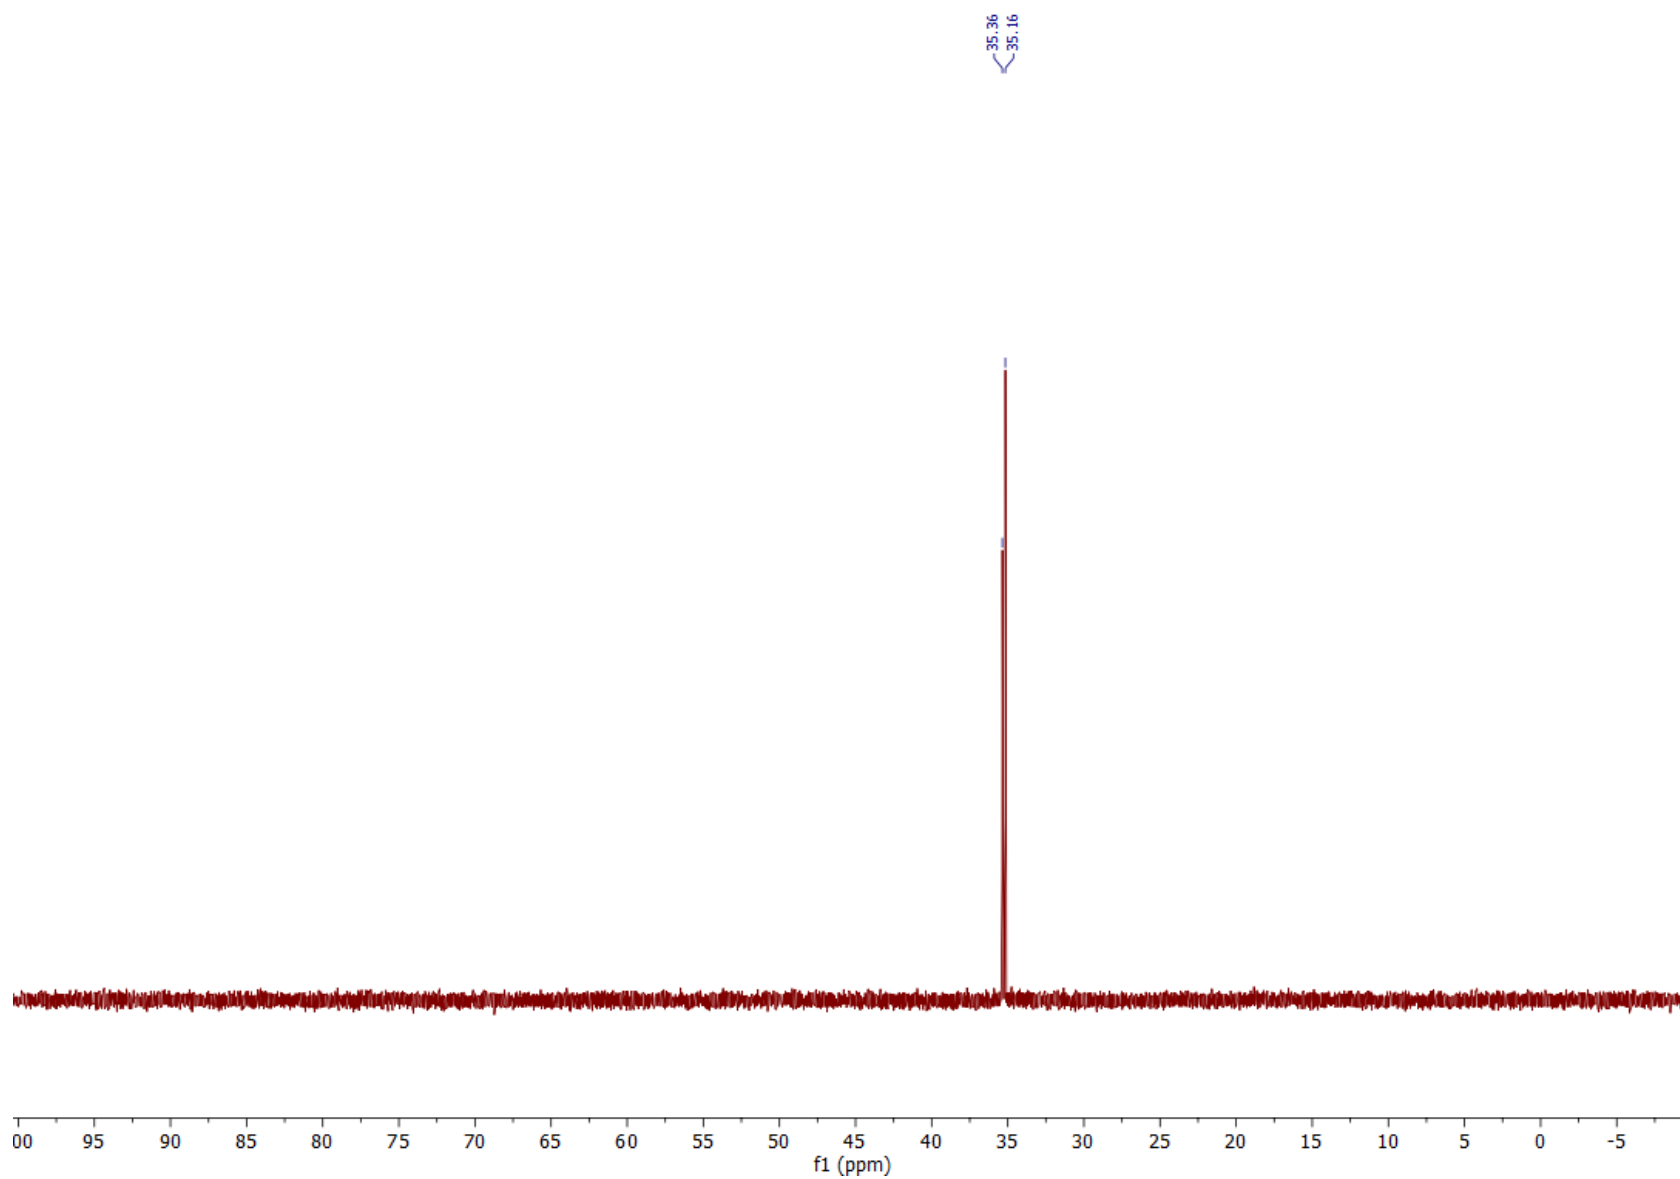

**Figure S54.**  $^{31}\text{P}$  NMR spectrum of **1h**.
